# Supplementary material
Source: publisher figshare collection journal article supplement (https://gsajournals.figshare.com/ndownloader/files/13238867)
Supplement: Supplementary file 1 [file 13238867]

## Sheet: OrthoMCL
Table S4 - OrthoMCL grouping of the T. urticae proteome (version of August 11, 2016; Jonckheere 2018, PhD dissertation, ISBN: 9789491407543). A summary of the number of T. urticae proteins in each OrthoMCL can be found in the worksheet 'OrthoMCL summary'.
T. urticae gene ID*	OrthoMCL group
tetur01g01690	Tetra_1
tetur01g01910	Tetra_1
tetur01g05350	Tetra_1
tetur01g11810	Tetra_1
tetur01g11610	Tetra_1
tetur01g14990	Tetra_1
tetur01g13080	Tetra_1
tetur01g13090	Tetra_1
tetur01g13100	Tetra_1
tetur01g13110	Tetra_1
tetur01g13120	Tetra_1
tetur01g13130	Tetra_1
tetur01g07920	Tetra_1
tetur01g07970	Tetra_1
tetur01g07990	Tetra_1
tetur01g08000	Tetra_1
tetur01g08030	Tetra_1
tetur01g08040	Tetra_1
tetur01g08070	Tetra_1
tetur01g08080	Tetra_1
tetur01g08090	Tetra_1
tetur01g08100	Tetra_1
tetur01g08130	Tetra_1
tetur01g08140	Tetra_1
tetur01g08150	Tetra_1
tetur01g08170	Tetra_1
tetur01g08180	Tetra_1
tetur01g08240	Tetra_1
tetur01g08370	Tetra_1
tetur01g15020	Tetra_1
tetur01g92400	Tetra_1
tetur01g92403	Tetra_1
tetur01g16554	Tetra_1
tetur01g17294	Tetra_1
tetur01g17304	Tetra_1
tetur01g17314	Tetra_1
tetur02g03970	Tetra_1
tetur02g11000	Tetra_1
tetur03g02870	Tetra_1
tetur04g09557	Tetra_1
tetur04g02810	Tetra_1
tetur04g07600	Tetra_1
tetur05g09535	Tetra_1
tetur05g09545	Tetra_1
tetur05g92637	Tetra_1
tetur05g05460	Tetra_1
tetur05g06290	Tetra_1
tetur05g02110	Tetra_1
tetur05g02140	Tetra_1
tetur05g02160	Tetra_1
tetur05g02210	Tetra_1
tetur05g02230	Tetra_1
tetur05g02260	Tetra_1
tetur05g02280	Tetra_1
tetur05g02300	Tetra_1
tetur05g02310	Tetra_1
tetur05g02320	Tetra_1
tetur05g02370	Tetra_1
tetur05g02400	Tetra_1
tetur05g02410	Tetra_1
tetur05g02430	Tetra_1
tetur05g02460	Tetra_1
tetur05g02470	Tetra_1
tetur05g02480	Tetra_1
tetur05g02490	Tetra_1
tetur05g02500	Tetra_1
tetur06g02370	Tetra_1
tetur06g02640	Tetra_1
tetur06g02690	Tetra_1
tetur06g03470	Tetra_1
tetur07g01300	Tetra_1
tetur07g01450	Tetra_1
tetur07g01460	Tetra_1
tetur07g02180	Tetra_1
tetur07g02190	Tetra_1
tetur07g02210	Tetra_1
tetur07g02220	Tetra_1
tetur07g02230	Tetra_1
tetur07g02240	Tetra_1
tetur07g02250	Tetra_1
tetur07g02270	Tetra_1
tetur07g02290	Tetra_1
tetur07g02310	Tetra_1
tetur07g02340	Tetra_1
tetur07g02360	Tetra_1
tetur07g02370	Tetra_1
tetur07g02390	Tetra_1
tetur07g02400	Tetra_1
tetur07g02410	Tetra_1
tetur07g02420	Tetra_1
tetur07g02430	Tetra_1
tetur07g02600	Tetra_1
tetur07g02610	Tetra_1
tetur07g02630	Tetra_1
tetur07g02640	Tetra_1
tetur07g02650	Tetra_1
tetur07g02660	Tetra_1
tetur07g02680	Tetra_1
tetur07g02690	Tetra_1
tetur07g00490	Tetra_1
tetur07g00610	Tetra_1
tetur07g00670	Tetra_1
tetur07g00680	Tetra_1
tetur07g00690	Tetra_1
tetur07g00700	Tetra_1
tetur07g00710	Tetra_1
tetur07g00730	Tetra_1
tetur07g00800	Tetra_1
tetur07g00810	Tetra_1
tetur07g07820	Tetra_1
tetur07g07890	Tetra_1
tetur07g07900	Tetra_1
tetur07g07920	Tetra_1
tetur07g07930	Tetra_1
tetur07g07940	Tetra_1
tetur07g07950	Tetra_1
tetur07g07960	Tetra_1
tetur07g07970	Tetra_1
tetur07g07980	Tetra_1
tetur07g08169	Tetra_1
tetur07g08279	Tetra_1
tetur07g91875	Tetra_1
tetur05g92636	Tetra_1
tetur07g07130	Tetra_1
tetur07g91894	Tetra_1
tetur07g91901	Tetra_1
tetur07g06280	Tetra_1
tetur08g02290	Tetra_1
tetur08g06130	Tetra_1
tetur10g02140	Tetra_1
tetur10g05040	Tetra_1
tetur11g01860	Tetra_1
tetur11g90942	Tetra_1
tetur120g00010	Tetra_1
tetur120g00030	Tetra_1
tetur120g00040	Tetra_1
tetur12g02130	Tetra_1
tetur12g91730	Tetra_1
tetur12g91771	Tetra_1
tetur12g03680	Tetra_1
tetur12g04180	Tetra_1
tetur12g04685	Tetra_1
tetur15g03970	Tetra_1
tetur15g91266	Tetra_1
tetur17g03360	Tetra_1
tetur20g01180	Tetra_1
tetur20g01200	Tetra_1
tetur20g01240	Tetra_1
tetur233g00010	Tetra_1
tetur233g00040	Tetra_1
tetur248g00020	Tetra_1
tetur24g02090	Tetra_1
tetur24g02130	Tetra_1
tetur24g02150	Tetra_1
tetur268g00010	Tetra_1
tetur28g02570	Tetra_1
tetur26g02903	Tetra_1
tetur279g00020	Tetra_1
tetur28g00990	Tetra_1
tetur32g90865	Tetra_1
tetur34g01243	Tetra_1
tetur34g01253	Tetra_1
tetur34g01263	Tetra_1
tetur34g91809	Tetra_1
tetur32g01890	Tetra_1
tetur34g00090	Tetra_1
tetur34g00160	Tetra_1
tetur34g00180	Tetra_1
tetur34g00200	Tetra_1
tetur34g00210	Tetra_1
tetur34g00220	Tetra_1
tetur34g00230	Tetra_1
tetur34g00240	Tetra_1
tetur34g00250	Tetra_1
tetur34g00300	Tetra_1
tetur34g00310	Tetra_1
tetur34g00330	Tetra_1
tetur34g00360	Tetra_1
tetur36g01130	Tetra_1
tetur36g01140	Tetra_1
tetur49g00020	Tetra_1
tetur49g00030	Tetra_1
tetur49g00100	Tetra_1
tetur49g00110	Tetra_1
tetur49g00130	Tetra_1
tetur49g00140	Tetra_1
tetur49g00150	Tetra_1
tetur49g00160	Tetra_1
tetur49g00180	Tetra_1
tetur49g00190	Tetra_1
tetur49g00200	Tetra_1
tetur49g00210	Tetra_1
tetur466g00030	Tetra_1
tetur641g00010	Tetra_1
tetur65g00010	Tetra_1
tetur65g00020	Tetra_1
tetur411g00010	Tetra_1
tetur411g00020	Tetra_1
tetur65g00050	Tetra_1
tetur65g00060	Tetra_1
tetur65g00070	Tetra_1
tetur65g00080	Tetra_1
tetur65g90088	Tetra_1
tetur65g90089	Tetra_1
tetur65g90090	Tetra_1
tetur65g90091	Tetra_1
tetur82g00020	Tetra_1
tetur82g00040	Tetra_1
tetur82g00060	Tetra_1
tetur01g14820	Tetra_2
tetur01g14830	Tetra_2
tetur01g14840	Tetra_2
tetur01g14870	Tetra_2
tetur01g14880	Tetra_2
tetur01g14900	Tetra_2
tetur01g14950	Tetra_2
tetur01g14970	Tetra_2
tetur01g91162	Tetra_2
tetur02g00190	Tetra_2
tetur01g16614	Tetra_2
tetur01g16694	Tetra_2
tetur02g02230	Tetra_2
tetur02g04180	Tetra_2
tetur02g04200	Tetra_2
tetur02g08930	Tetra_2
tetur02g15287	Tetra_2
tetur04g09504	Tetra_2
tetur04g02560	Tetra_2
tetur04g02570	Tetra_2
tetur04g05470	Tetra_2
tetur04g05500	Tetra_2
tetur04g05530	Tetra_2
tetur04g05590	Tetra_2
tetur04g05610	Tetra_2
tetur04g03360	Tetra_2
tetur05g07870	Tetra_2
tetur07g01770	Tetra_2
tetur07g01820	Tetra_2
tetur119g00010	Tetra_2
tetur10g05340	Tetra_2
tetur121g00010	Tetra_2
tetur121g00030	Tetra_2
tetur11g05240	Tetra_2
tetur11g06380	Tetra_2
tetur131g00010	Tetra_2
tetur131g00030	Tetra_2
tetur131g00050	Tetra_2
tetur13g01070	Tetra_2
tetur13g01100	Tetra_2
tetur13g04560	Tetra_2
tetur13g04570	Tetra_2
tetur13g04580	Tetra_2
tetur13g04590	Tetra_2
tetur13g04600	Tetra_2
tetur13g04620	Tetra_2
tetur13g04630	Tetra_2
tetur13g04640	Tetra_2
tetur13g04650	Tetra_2
tetur13g04660	Tetra_2
tetur13g04670	Tetra_2
tetur150g00001	Tetra_2
tetur14g02630	Tetra_2
tetur17g00010	Tetra_2
tetur17g00030	Tetra_2
tetur17g00040	Tetra_2
tetur17g00060	Tetra_2
tetur17g00070	Tetra_2
tetur17g02940	Tetra_2
tetur17g02980	Tetra_2
tetur17g02990	Tetra_2
tetur17g03000	Tetra_2
tetur17g03020	Tetra_2
tetur17g03050	Tetra_2
tetur17g03060	Tetra_2
tetur17g03070	Tetra_2
tetur17g03080	Tetra_2
tetur17g03090	Tetra_2
tetur17g03980	Tetra_2
tetur17g04010	Tetra_2
tetur17g04030	Tetra_2
tetur17g04040	Tetra_2
tetur17g04050	Tetra_2
tetur17g04060	Tetra_2
tetur17g04080	Tetra_2
tetur17g04090	Tetra_2
tetur17g04100	Tetra_2
tetur17g04110	Tetra_2
tetur17g04120	Tetra_2
tetur17g04150	Tetra_2
tetur17g04160	Tetra_2
tetur17g04170	Tetra_2
tetur17g04180	Tetra_2
tetur17g04190	Tetra_2
tetur17g04210	Tetra_2
tetur17g04220	Tetra_2
tetur17g92121	Tetra_2
tetur17g92165	Tetra_2
tetur17g92166	Tetra_2
tetur17g01060	Tetra_2
tetur17g01070	Tetra_2
tetur17g01210	Tetra_2
tetur19g01600	Tetra_2
tetur19g00260	Tetra_2
tetur19g02610	Tetra_2
tetur19g02630	Tetra_2
tetur19g02640	Tetra_2
tetur19g02650	Tetra_2
tetur19g02670	Tetra_2
tetur19g02700	Tetra_2
tetur22g00910	Tetra_2
tetur22g00920	Tetra_2
tetur22g00930	Tetra_2
tetur24g00240	Tetra_2
tetur24g00260	Tetra_2
tetur24g02550	Tetra_2
tetur24g02697	Tetra_2
tetur24g02707	Tetra_2
tetur24g02717	Tetra_2
tetur24g02737	Tetra_2
tetur24g02747	Tetra_2
tetur24g02757	Tetra_2
tetur24g02777	Tetra_2
tetur24g02787	Tetra_2
tetur24g02797	Tetra_2
tetur24g02807	Tetra_2
tetur24g02827	Tetra_2
tetur24g02867	Tetra_2
tetur24g02877	Tetra_2
tetur24g02887	Tetra_2
tetur24g02917	Tetra_2
tetur24g02937	Tetra_2
tetur24g02957	Tetra_2
tetur24g92174	Tetra_2
tetur28g00180	Tetra_2
tetur32g02190	Tetra_2
tetur32g02210	Tetra_2
tetur32g02220	Tetra_2
tetur32g02250	Tetra_2
tetur33g00010	Tetra_2
tetur33g00070	Tetra_2
tetur33g00090	Tetra_2
tetur33g00100	Tetra_2
tetur33g00110	Tetra_2
tetur33g00130	Tetra_2
tetur33g00140	Tetra_2
tetur33g00150	Tetra_2
tetur33g00980	Tetra_2
tetur33g00990	Tetra_2
tetur33g01000	Tetra_2
tetur33g01010	Tetra_2
tetur33g01020	Tetra_2
tetur33g01030	Tetra_2
tetur44g00080	Tetra_2
tetur44g00090	Tetra_2
tetur44g00110	Tetra_2
tetur44g00271	Tetra_2
tetur592g00001	Tetra_2
tetur629g00010	Tetra_2
tetur85g00003	Tetra_2
tetur84g00060	Tetra_2
tetur85g00001	Tetra_2
tetur85g00002	Tetra_2
tetur02g04810	Tetra_3
tetur02g02750	Tetra_3
tetur02g09200	Tetra_3
tetur02g92493	Tetra_3
tetur02g92516	Tetra_3
tetur04g09629	Tetra_3
tetur04g92234	Tetra_3
tetur04g92236	Tetra_3
tetur04g05690	Tetra_3
tetur04g04320	Tetra_3
tetur04g04680	Tetra_3
tetur04g04690	Tetra_3
tetur04g04710	Tetra_3
tetur04g04720	Tetra_3
tetur04g04740	Tetra_3
tetur04g04750	Tetra_3
tetur05g07410	Tetra_3
tetur06g01410	Tetra_3
tetur06g91408	Tetra_3
tetur10g05280	Tetra_3
tetur13g03410	Tetra_3
tetur14g01110	Tetra_3
tetur14g01130	Tetra_3
tetur14g01150	Tetra_3
tetur14g01200	Tetra_3
tetur04g92282	Tetra_3
tetur14g03130	Tetra_3
tetur14g03180	Tetra_3
tetur15g01420	Tetra_3
tetur15g01430	Tetra_3
tetur15g01440	Tetra_3
tetur15g01450	Tetra_3
tetur15g01460	Tetra_3
tetur15g01470	Tetra_3
tetur15g01500	Tetra_3
tetur15g01520	Tetra_3
tetur15g02580	Tetra_3
tetur15g02590	Tetra_3
tetur15g02600	Tetra_3
tetur15g02860	Tetra_3
tetur15g02960	Tetra_3
tetur15g02980	Tetra_3
tetur15g02990	Tetra_3
tetur15g03000	Tetra_3
tetur15g03080	Tetra_3
tetur15g03090	Tetra_3
tetur15g03160	Tetra_3
tetur15g03180	Tetra_3
tetur15g03480	Tetra_3
tetur15g03490	Tetra_3
tetur15g03530	Tetra_3
tetur15g03540	Tetra_3
tetur15g03550	Tetra_3
tetur15g03560	Tetra_3
tetur15g03570	Tetra_3
tetur15g03580	Tetra_3
tetur15g03590	Tetra_3
tetur15g03620	Tetra_3
tetur15g03640	Tetra_3
tetur15g03650	Tetra_3
tetur15g03660	Tetra_3
tetur15g03850	Tetra_3
tetur15g03860	Tetra_3
tetur15g03870	Tetra_3
tetur15g03880	Tetra_3
tetur15g03890	Tetra_3
tetur15g03900	Tetra_3
tetur15g03910	Tetra_3
tetur15g03920	Tetra_3
tetur15g03930	Tetra_3
tetur15g03940	Tetra_3
tetur15g03950	Tetra_3
tetur15g03960	Tetra_3
tetur15g03980	Tetra_3
tetur15g03990	Tetra_3
tetur15g04000	Tetra_3
tetur15g04010	Tetra_3
tetur15g03770	Tetra_3
tetur15g04020	Tetra_3
tetur15g04040	Tetra_3
tetur15g04050	Tetra_3
tetur15g04060	Tetra_3
tetur15g91262	Tetra_3
tetur15g91270	Tetra_3
tetur15g91271	Tetra_3
tetur15g91283	Tetra_3
tetur15g91284	Tetra_3
tetur15g91289	Tetra_3
tetur16g90574	Tetra_3
tetur16g01850	Tetra_3
tetur16g01870	Tetra_3
tetur16g01890	Tetra_3
tetur16g01900	Tetra_3
tetur16g01960	Tetra_3
tetur16g02000	Tetra_3
tetur16g02050	Tetra_3
tetur16g02130	Tetra_3
tetur16g02140	Tetra_3
tetur16g02290	Tetra_3
tetur16g02630	Tetra_3
tetur16g02690	Tetra_3
tetur16g02940	Tetra_3
tetur16g03858	Tetra_3
tetur17g01570	Tetra_3
tetur18g01970	Tetra_3
tetur18g01980	Tetra_3
tetur18g02300	Tetra_3
tetur22g92571	Tetra_3
tetur23g91471	Tetra_3
tetur24g00410	Tetra_3
tetur24g00450	Tetra_3
tetur24g00470	Tetra_3
tetur24g00590	Tetra_3
tetur24g00600	Tetra_3
tetur24g00610	Tetra_3
tetur24g00650	Tetra_3
tetur24g00710	Tetra_3
tetur24g00760	Tetra_3
tetur24g00960	Tetra_3
tetur24g01130	Tetra_3
tetur24g92197	Tetra_3
tetur24g01730	Tetra_3
tetur24g02100	Tetra_3
tetur24g02110	Tetra_3
tetur25g01180	Tetra_3
tetur25g01770	Tetra_3
tetur25g01830	Tetra_3
tetur25g00380	Tetra_3
tetur25g00410	Tetra_3
tetur25g00540	Tetra_3
tetur25g00560	Tetra_3
tetur25g00850	Tetra_3
tetur25g00860	Tetra_3
tetur25g00870	Tetra_3
tetur25g00890	Tetra_3
tetur25g00880	Tetra_3
tetur25g00900	Tetra_3
tetur25g00910	Tetra_3
tetur25g01070	Tetra_3
tetur25g01080	Tetra_3
tetur25g01090	Tetra_3
tetur25g01100	Tetra_3
tetur25g92728	Tetra_3
tetur25g92729	Tetra_3
tetur26g01880	Tetra_3
tetur02g92514	Tetra_3
tetur26g02270	Tetra_3
tetur26g02420	Tetra_3
tetur26g02530	Tetra_3
tetur26g02812	Tetra_3
tetur26g02822	Tetra_3
tetur26g02829	Tetra_3
tetur26g00820	Tetra_3
tetur26g00830	Tetra_3
tetur26g00860	Tetra_3
tetur26g00870	Tetra_3
tetur26g00880	Tetra_3
tetur26g00890	Tetra_3
tetur26g00910	Tetra_3
tetur26g01530	Tetra_3
tetur271g00010	Tetra_3
tetur271g00020	Tetra_3
tetur28g00350	Tetra_3
tetur30g01240	Tetra_3
tetur344g00010	Tetra_3
tetur372g00010	Tetra_3
tetur48g00010	Tetra_3
tetur48g00030	Tetra_3
tetur48g00040	Tetra_3
tetur48g00080	Tetra_3
tetur531g00010	Tetra_3
tetur459g00010	Tetra_3
tetur459g00020	Tetra_3
tetur60g00060	Tetra_3
tetur567g00010	Tetra_3
tetur01g92312	Tetra_4
tetur01g16734	Tetra_4
tetur01g16744	Tetra_4
tetur01g16754	Tetra_4
tetur01g16784	Tetra_4
tetur01g16834	Tetra_4
tetur01g16844	Tetra_4
tetur01g16854	Tetra_4
tetur01g16864	Tetra_4
tetur02g06680	Tetra_4
tetur02g06690	Tetra_4
tetur02g06710	Tetra_4
tetur02g06720	Tetra_4
tetur02g06730	Tetra_4
tetur02g06740	Tetra_4
tetur02g06750	Tetra_4
tetur02g06760	Tetra_4
tetur02g06770	Tetra_4
tetur02g06780	Tetra_4
tetur02g06800	Tetra_4
tetur02g06810	Tetra_4
tetur02g06820	Tetra_4
tetur02g06830	Tetra_4
tetur02g06860	Tetra_4
tetur02g06870	Tetra_4
tetur02g08860	Tetra_4
tetur02g90739	Tetra_4
tetur02g15227	Tetra_4
tetur02g15237	Tetra_4
tetur02g14340	Tetra_4
tetur02g14350	Tetra_4
tetur03g04270	Tetra_4
tetur03g07800	Tetra_4
tetur03g07910	Tetra_4
tetur04g09587	Tetra_4
tetur07g04980	Tetra_4
tetur07g04990	Tetra_4
tetur07g05000	Tetra_4
tetur07g05030	Tetra_4
tetur07g05040	Tetra_4
tetur07g08097	Tetra_4
tetur07g08107	Tetra_4
tetur07g08117	Tetra_4
tetur08g00530	Tetra_4
tetur08g00540	Tetra_4
tetur08g00750	Tetra_4
tetur08g00770	Tetra_4
tetur08g00780	Tetra_4
tetur08g00790	Tetra_4
tetur08g00800	Tetra_4
tetur08g00840	Tetra_4
tetur08g00860	Tetra_4
tetur08g00870	Tetra_4
tetur08g00880	Tetra_4
tetur08g00910	Tetra_4
tetur08g01070	Tetra_4
tetur08g01080	Tetra_4
tetur08g01090	Tetra_4
tetur08g08100	Tetra_4
tetur08g08110	Tetra_4
tetur08g08130	Tetra_4
tetur08g08150	Tetra_4
tetur08g08160	Tetra_4
tetur08g08170	Tetra_4
tetur08g08200	Tetra_4
tetur08g08210	Tetra_4
tetur08g08220	Tetra_4
tetur08g08230	Tetra_4
tetur08g08265	Tetra_4
tetur09g03640	Tetra_4
tetur09g03660	Tetra_4
tetur09g02300	Tetra_4
tetur09g02310	Tetra_4
tetur09g02320	Tetra_4
tetur09g06799	Tetra_4
tetur09g06809	Tetra_4
tetur09g06819	Tetra_4
tetur12g00130	Tetra_4
tetur12g00150	Tetra_4
tetur12g00160	Tetra_4
tetur12g00170	Tetra_4
tetur12g01060	Tetra_4
tetur11g05510	Tetra_4
tetur12g04913	Tetra_4
tetur144g00002	Tetra_4
tetur144g00003	Tetra_4
tetur144g00006	Tetra_4
tetur13g04716	Tetra_4
tetur13g04726	Tetra_4
tetur14g01230	Tetra_4
tetur14g01240	Tetra_4
tetur14g01250	Tetra_4
tetur14g01260	Tetra_4
tetur167g00020	Tetra_4
tetur16g04066	Tetra_4
tetur16g04086	Tetra_4
tetur16g04096	Tetra_4
tetur16g04106	Tetra_4
tetur16g03916	Tetra_4
tetur16g03956	Tetra_4
tetur16g03966	Tetra_4
tetur16g03976	Tetra_4
tetur16g03986	Tetra_4
tetur16g03996	Tetra_4
tetur16g04006	Tetra_4
tetur16g04046	Tetra_4
tetur16g04056	Tetra_4
tetur17g00720	Tetra_4
tetur17g00730	Tetra_4
tetur18g03470	Tetra_4
tetur18g03480	Tetra_4
tetur18g03721	Tetra_4
tetur18g03731	Tetra_4
tetur18g03741	Tetra_4
tetur18g03751	Tetra_4
tetur18g03761	Tetra_4
tetur18g03771	Tetra_4
tetur18g03781	Tetra_4
tetur18g03791	Tetra_4
tetur18g03801	Tetra_4
tetur18g03811	Tetra_4
tetur18g03821	Tetra_4
tetur18g03831	Tetra_4
tetur18g03841	Tetra_4
tetur18g92107	Tetra_4
tetur18g92108	Tetra_4
tetur18g92110	Tetra_4
tetur20g03320	Tetra_4
tetur21g03350	Tetra_4
tetur21g03360	Tetra_4
tetur21g03370	Tetra_4
tetur21g03380	Tetra_4
tetur21g03400	Tetra_4
tetur25g02112	Tetra_4
tetur305g00020	Tetra_4
tetur31g02042	Tetra_4
tetur371g00001	Tetra_4
tetur46g00120	Tetra_4
tetur40g00402	Tetra_4
tetur01g14890	Tetra_5
tetur01g15000	Tetra_5
tetur01g15010	Tetra_5
tetur01g15050	Tetra_5
tetur02g03020	Tetra_5
tetur02g03060	Tetra_5
tetur02g12970	Tetra_5
tetur02g12980	Tetra_5
tetur02g13030	Tetra_5
tetur02g13040	Tetra_5
tetur02g13050	Tetra_5
tetur02g13070	Tetra_5
tetur02g13080	Tetra_5
tetur02g90608	Tetra_5
tetur02g90609	Tetra_5
tetur02g90610	Tetra_5
tetur02g90641	Tetra_5
tetur02g14100	Tetra_5
tetur02g14120	Tetra_5
tetur02g14130	Tetra_5
tetur02g14140	Tetra_5
tetur02g14150	Tetra_5
tetur02g14440	Tetra_5
tetur02g14450	Tetra_5
tetur02g14460	Tetra_5
tetur02g14500	Tetra_5
tetur02g14530	Tetra_5
tetur03g91512	Tetra_5
tetur03g91513	Tetra_5
tetur03g91514	Tetra_5
tetur03g91530	Tetra_5
tetur03g02750	Tetra_5
tetur03g06980	Tetra_5
tetur03g06990	Tetra_5
tetur03g07000	Tetra_5
tetur03g07010	Tetra_5
tetur03g07020	Tetra_5
tetur03g07030	Tetra_5
tetur03g07040	Tetra_5
tetur03g07050	Tetra_5
tetur03g07060	Tetra_5
tetur03g07200	Tetra_5
tetur03g07220	Tetra_5
tetur03g07230	Tetra_5
tetur03g07240	Tetra_5
tetur03g07420	Tetra_5
tetur03g07450	Tetra_5
tetur03g91586	Tetra_5
tetur04g92226	Tetra_5
tetur04g03990	Tetra_5
tetur04g04010	Tetra_5
tetur05g92668	Tetra_5
tetur10g00110	Tetra_5
tetur10g02370	Tetra_5
tetur16g90596	Tetra_5
tetur16g90604	Tetra_5
tetur180g00010	Tetra_5
tetur16g03210	Tetra_5
tetur16g03240	Tetra_5
tetur16g03250	Tetra_5
tetur16g03260	Tetra_5
tetur16g03280	Tetra_5
tetur16g03290	Tetra_5
tetur16g03310	Tetra_5
tetur16g03340	Tetra_5
tetur16g03490	Tetra_5
tetur16g03520	Tetra_5
tetur16g03530	Tetra_5
tetur16g03540	Tetra_5
tetur16g03550	Tetra_5
tetur16g03560	Tetra_5
tetur16g03570	Tetra_5
tetur16g03590	Tetra_5
tetur16g03690	Tetra_5
tetur16g03760	Tetra_5
tetur16g03780	Tetra_5
tetur21g03030	Tetra_5
tetur220g00020	Tetra_5
tetur23g00040	Tetra_5
tetur23g00070	Tetra_5
tetur23g00120	Tetra_5
tetur23g00170	Tetra_5
tetur24g00160	Tetra_5
tetur24g00200	Tetra_5
tetur24g92198	Tetra_5
tetur25g02030	Tetra_5
tetur277g00020	Tetra_5
tetur31g00720	Tetra_5
tetur31g00760	Tetra_5
tetur31g00860	Tetra_5
tetur30g02020	Tetra_5
tetur31g01990	Tetra_5
tetur31g02020	Tetra_5
tetur33g00630	Tetra_5
tetur33g00700	Tetra_5
tetur33g00710	Tetra_5
tetur33g01430	Tetra_5
tetur33g01450	Tetra_5
tetur33g01510	Tetra_5
tetur33g01520	Tetra_5
tetur30g00700	Tetra_5
tetur30g00710	Tetra_5
tetur30g00730	Tetra_5
tetur30g00740	Tetra_5
tetur30g00750	Tetra_5
tetur30g00760	Tetra_5
tetur39g00350	Tetra_5
tetur39g00360	Tetra_5
tetur39g00430	Tetra_5
tetur649g00010	Tetra_5
tetur89g00020	Tetra_5
tetur671g00010	Tetra_5
tetur71g00010	Tetra_5
tetur71g00050	Tetra_5
tetur71g00060	Tetra_5
tetur09g00360	Tetra_6
tetur09g00516	Tetra_6
tetur09g00536	Tetra_6
tetur09g04510	Tetra_6
tetur09g04640	Tetra_6
tetur09g04650	Tetra_6
tetur09g04660	Tetra_6
tetur09g04670	Tetra_6
tetur09g04680	Tetra_6
tetur09g04690	Tetra_6
tetur09g04830	Tetra_6
tetur09g03700	Tetra_6
tetur09g03710	Tetra_6
tetur09g07590	Tetra_6
tetur09g07600	Tetra_6
tetur09g07630	Tetra_6
tetur09g07640	Tetra_6
tetur09g07650	Tetra_6
tetur09g07660	Tetra_6
tetur09g07670	Tetra_6
tetur09g07680	Tetra_6
tetur09g07690	Tetra_6
tetur09g07700	Tetra_6
tetur09g07710	Tetra_6
tetur09g07720	Tetra_6
tetur09g07730	Tetra_6
tetur09g07740	Tetra_6
tetur09g07770	Tetra_6
tetur09g07780	Tetra_6
tetur09g92863	Tetra_6
tetur09g92867	Tetra_6
tetur09g92879	Tetra_6
tetur09g92883	Tetra_6
tetur09g92888	Tetra_6
tetur09g92889	Tetra_6
tetur09g92895	Tetra_6
tetur09g06739	Tetra_6
tetur09g06840	Tetra_6
tetur09g92875	Tetra_6
tetur09g06850	Tetra_6
tetur09g06860	Tetra_6
tetur09g92882	Tetra_6
tetur09g06870	Tetra_6
tetur09g06880	Tetra_6
tetur09g06890	Tetra_6
tetur09g06900	Tetra_6
tetur09g06910	Tetra_6
tetur09g06920	Tetra_6
tetur09g06930	Tetra_6
tetur09g06940	Tetra_6
tetur09g92894	Tetra_6
tetur09g06950	Tetra_6
tetur09g06960	Tetra_6
tetur09g07020	Tetra_6
tetur09g07030	Tetra_6
tetur09g07050	Tetra_6
tetur09g07060	Tetra_6
tetur09g07070	Tetra_6
tetur09g07080	Tetra_6
tetur09g07090	Tetra_6
tetur09g07110	Tetra_6
tetur09g07120	Tetra_6
tetur09g07130	Tetra_6
tetur09g07160	Tetra_6
tetur09g07170	Tetra_6
tetur09g07200	Tetra_6
tetur09g07210	Tetra_6
tetur09g07230	Tetra_6
tetur09g07320	Tetra_6
tetur09g07330	Tetra_6
tetur09g07340	Tetra_6
tetur09g07350	Tetra_6
tetur09g07360	Tetra_6
tetur09g07370	Tetra_6
tetur09g07380	Tetra_6
tetur09g07420	Tetra_6
tetur09g07450	Tetra_6
tetur09g07460	Tetra_6
tetur09g07470	Tetra_6
tetur09g07480	Tetra_6
tetur19g02830	Tetra_6
tetur250g00006	Tetra_6
tetur250g00007	Tetra_6
tetur25g01690	Tetra_6
tetur491g00010	Tetra_6
tetur552g00002	Tetra_6
tetur68g00010	Tetra_6
tetur68g00020	Tetra_6
tetur68g00030	Tetra_6
tetur06g01380	Tetra_7
tetur08g01680	Tetra_7
tetur142g00010	Tetra_7
tetur142g00020	Tetra_7
tetur142g00030	Tetra_7
tetur142g00050	Tetra_7
tetur15g01220	Tetra_7
tetur15g01250	Tetra_7
tetur15g01270	Tetra_7
tetur15g01280	Tetra_7
tetur15g01310	Tetra_7
tetur15g01340	Tetra_7
tetur15g01350	Tetra_7
tetur15g01360	Tetra_7
tetur15g01370	Tetra_7
tetur15g01380	Tetra_7
tetur15g01390	Tetra_7
tetur15g91246	Tetra_7
tetur15g91247	Tetra_7
tetur15g91248	Tetra_7
tetur15g91249	Tetra_7
tetur15g91251	Tetra_7
tetur15g91255	Tetra_7
tetur15g91256	Tetra_7
tetur15g91257	Tetra_7
tetur15g00260	Tetra_7
tetur15g00780	Tetra_7
tetur15g00810	Tetra_7
tetur15g00820	Tetra_7
tetur15g00830	Tetra_7
tetur15g00860	Tetra_7
tetur15g01060	Tetra_7
tetur15g01070	Tetra_7
tetur15g01080	Tetra_7
tetur15g01090	Tetra_7
tetur15g01100	Tetra_7
tetur15g01110	Tetra_7
tetur15g01130	Tetra_7
tetur15g01140	Tetra_7
tetur15g01160	Tetra_7
tetur15g01170	Tetra_7
tetur15g01180	Tetra_7
tetur15g01190	Tetra_7
tetur15g01200	Tetra_7
tetur15g01210	Tetra_7
tetur16g02580	Tetra_7
tetur16g02590	Tetra_7
tetur18g00440	Tetra_7
tetur20g02100	Tetra_7
tetur20g02110	Tetra_7
tetur20g02120	Tetra_7
tetur20g02140	Tetra_7
tetur23g01440	Tetra_7
tetur23g01460	Tetra_7
tetur23g01570	Tetra_7
tetur27g00850	Tetra_7
tetur27g00870	Tetra_7
tetur27g00890	Tetra_7
tetur27g00910	Tetra_7
tetur27g00920	Tetra_7
tetur142g00040	Tetra_7
tetur27g00930	Tetra_7
tetur27g00950	Tetra_7
tetur27g00960	Tetra_7
tetur27g00650	Tetra_7
tetur36g00740	Tetra_7
tetur36g00750	Tetra_7
tetur36g00760	Tetra_7
tetur36g00770	Tetra_7
tetur36g91069	Tetra_7
tetur36g91070	Tetra_7
tetur36g91072	Tetra_7
tetur36g91073	Tetra_7
tetur36g91074	Tetra_7
tetur634g00010	Tetra_7
tetur01g00540	Tetra_8
tetur02g00760	Tetra_8
tetur02g00770	Tetra_8
tetur02g06970	Tetra_8
tetur02g06980	Tetra_8
tetur02g15595	Tetra_8
tetur02g11870	Tetra_8
tetur02g11890	Tetra_8
tetur02g11910	Tetra_8
tetur02g12400	Tetra_8
tetur02g12440	Tetra_8
tetur03g91502	Tetra_8
tetur03g07530	Tetra_8
tetur03g04430	Tetra_8
tetur05g00510	Tetra_8
tetur05g00520	Tetra_8
tetur05g00540	Tetra_8
tetur05g00550	Tetra_8
tetur05g00610	Tetra_8
tetur05g00640	Tetra_8
tetur05g00650	Tetra_8
tetur05g00660	Tetra_8
tetur05g00670	Tetra_8
tetur05g00680	Tetra_8
tetur05g00700	Tetra_8
tetur05g92610	Tetra_8
tetur05g92611	Tetra_8
tetur05g92612	Tetra_8
tetur05g92614	Tetra_8
tetur06g06651	Tetra_8
tetur09g03340	Tetra_8
tetur09g03380	Tetra_8
tetur09g03390	Tetra_8
tetur09g03410	Tetra_8
tetur09g03460	Tetra_8
tetur11g90970	Tetra_8
tetur11g05290	Tetra_8
tetur11g05300	Tetra_8
tetur11g05310	Tetra_8
tetur11g05320	Tetra_8
tetur11g05330	Tetra_8
tetur11g05340	Tetra_8
tetur11g05350	Tetra_8
tetur11g05750	Tetra_8
tetur11g06522	Tetra_8
tetur16g00040	Tetra_8
tetur16g01650	Tetra_8
tetur20g01800	Tetra_8
tetur27g01200	Tetra_8
tetur30g02330	Tetra_8
tetur30g02340	Tetra_8
tetur30g90534	Tetra_8
tetur30g90535	Tetra_8
tetur328g00010	Tetra_8
tetur30g01280	Tetra_8
tetur30g01310	Tetra_8
tetur30g01330	Tetra_8
tetur30g01340	Tetra_8
tetur47g00110	Tetra_8
tetur56g90042	Tetra_8
tetur572g00010	Tetra_8
tetur573g00010	Tetra_8
tetur40g00170	Tetra_8
tetur01g12110	Tetra_9
tetur01g12390	Tetra_9
tetur01g12400	Tetra_9
tetur01g12410	Tetra_9
tetur01g12420	Tetra_9
tetur01g12610	Tetra_9
tetur01g12620	Tetra_9
tetur01g91139	Tetra_9
tetur01g91140	Tetra_9
tetur01g91141	Tetra_9
tetur01g91142	Tetra_9
tetur05g01160	Tetra_9
tetur05g01170	Tetra_9
tetur05g01180	Tetra_9
tetur05g92620	Tetra_9
tetur05g92621	Tetra_9
tetur05g92622	Tetra_9
tetur05g05730	Tetra_9
tetur06g02270	Tetra_9
tetur06g02780	Tetra_9
tetur08g00230	Tetra_9
tetur08g01530	Tetra_9
tetur08g01540	Tetra_9
tetur09g03740	Tetra_9
tetur10g02160	Tetra_9
tetur11g02640	Tetra_9
tetur11g02650	Tetra_9
tetur11g06368	Tetra_9
tetur16g03620	Tetra_9
tetur16g03630	Tetra_9
tetur16g03730	Tetra_9
tetur16g03740	Tetra_9
tetur21g02400	Tetra_9
tetur21g01270	Tetra_9
tetur21g91210	Tetra_9
tetur23g00650	Tetra_9
tetur23g00760	Tetra_9
tetur23g01500	Tetra_9
tetur23g91459	Tetra_9
tetur28g00980	Tetra_9
tetur28g01320	Tetra_9
tetur31g01850	Tetra_9
tetur31g01890	Tetra_9
tetur31g01900	Tetra_9
tetur31g01950	Tetra_9
tetur31g01960	Tetra_9
tetur33g01620	Tetra_9
tetur33g01630	Tetra_9
tetur33g01640	Tetra_9
tetur33g01660	Tetra_9
tetur33g01700	Tetra_9
tetur33g01710	Tetra_9
tetur55g00030	Tetra_9
tetur01g01400	Tetra_10
tetur01g07520	Tetra_10
tetur01g16714	Tetra_10
tetur04g08780	Tetra_10
tetur07g08057	Tetra_10
tetur07g08067	Tetra_10
tetur07g08077	Tetra_10
tetur08g00330	Tetra_10
tetur08g07160	Tetra_10
tetur09g03430	Tetra_10
tetur09g06728	Tetra_10
tetur09g06789	Tetra_10
tetur16g00670	Tetra_10
tetur17g03040	Tetra_10
tetur17g92124	Tetra_10
tetur19g03411	Tetra_10
tetur24g01040	Tetra_10
tetur27g01920	Tetra_10
tetur29g01290	Tetra_10
tetur30g02429	Tetra_10
tetur30g02439	Tetra_10
tetur30g02449	Tetra_10
tetur30g02459	Tetra_10
tetur30g02469	Tetra_10
tetur30g02479	Tetra_10
tetur41g00690	Tetra_10
tetur41g00720	Tetra_10
tetur01g01020	Tetra_11
tetur01g01030	Tetra_11
tetur01g01040	Tetra_11
tetur01g01070	Tetra_11
tetur01g02290	Tetra_11
tetur01g11490	Tetra_11
tetur01g14980	Tetra_11
tetur01g15350	Tetra_11
tetur03g02130	Tetra_11
tetur04g09689	Tetra_11
tetur04g02740	Tetra_11
tetur04g06350	Tetra_11
tetur04g03870	Tetra_11
tetur06g03730	Tetra_11
tetur06g03790	Tetra_11
tetur08g03130	Tetra_11
tetur09g05900	Tetra_11
tetur09g05910	Tetra_11
tetur10g02440	Tetra_11
tetur13g00530	Tetra_11
tetur19g03391	Tetra_11
tetur24g00040	Tetra_11
tetur24g01660	Tetra_11
tetur25g00590	Tetra_11
tetur35g00410	Tetra_11
tetur41g00660	Tetra_11
tetur43g00480	Tetra_11
tetur43g00500	Tetra_11
tetur538g00010	Tetra_11
tetur577g00020	Tetra_11
tetur01g92300	Tetra_12
tetur01g92369	Tetra_12
tetur02g07810	Tetra_12
tetur03g00190	Tetra_12
tetur03g07970	Tetra_12
tetur04g05550	Tetra_12
tetur04g05960	Tetra_12
tetur04g07270	Tetra_12
tetur07g07120	Tetra_12
tetur08g04090	Tetra_12
tetur09g04520	Tetra_12
tetur123g00020	Tetra_12
tetur12g00950	Tetra_12
tetur17g02360	Tetra_12
tetur21g03070	Tetra_12
tetur23g91462	Tetra_12
tetur27g02240	Tetra_12
tetur654g00010	Tetra_12
tetur04g09577	Tetra_13
tetur04g09618	Tetra_13
tetur04g02860	Tetra_13
tetur04g04020	Tetra_13
tetur04g04060	Tetra_13
tetur04g04070	Tetra_13
tetur04g04080	Tetra_13
tetur04g04090	Tetra_13
tetur04g04120	Tetra_13
tetur04g01310	Tetra_13
tetur04g01320	Tetra_13
tetur04g01350	Tetra_13
tetur04g01360	Tetra_13
tetur10g05440	Tetra_13
tetur10g05450	Tetra_13
tetur17g00110	Tetra_13
tetur17g00130	Tetra_13
tetur17g00250	Tetra_13
tetur17g00260	Tetra_13
tetur17g00270	Tetra_13
tetur17g00320	Tetra_13
tetur17g00340	Tetra_13
tetur16g02540	Tetra_13
tetur20g02810	Tetra_13
tetur20g02820	Tetra_13
tetur24g02600	Tetra_13
tetur24g02670	Tetra_13
tetur310g00010	Tetra_13
tetur373g00010	Tetra_13
tetur457g00010	Tetra_13
tetur01g05060	Tetra_14
tetur03g09090	Tetra_14
tetur03g09100	Tetra_14
tetur03g09110	Tetra_14
tetur04g02760	Tetra_14
tetur10g02840	Tetra_14
tetur10g05784	Tetra_14
tetur11g01980	Tetra_14
tetur11g04930	Tetra_14
tetur11g06420	Tetra_14
tetur13g04696	Tetra_14
tetur13g03050	Tetra_14
tetur13g03090	Tetra_14
tetur13g03110	Tetra_14
tetur14g00710	Tetra_14
tetur19g03401	Tetra_14
tetur26g02843	Tetra_14
tetur01g01060	Tetra_15
tetur09g05460	Tetra_15
tetur14g00970	Tetra_15
tetur14g02520	Tetra_15
tetur16g03861	Tetra_15
tetur19g00270	Tetra_15
tetur20g02450	Tetra_15
tetur20g02850	Tetra_15
tetur24g02490	Tetra_15
tetur24g01360	Tetra_15
tetur27g01000	Tetra_15
tetur27g01010	Tetra_15
tetur28g00810	Tetra_15
tetur28g00820	Tetra_15
tetur378g90227	Tetra_15
tetur407g00010	Tetra_15
tetur99g00020	Tetra_15
tetur01g01310	Tetra_16
tetur01g05320	Tetra_16
tetur01g92305	Tetra_16
tetur01g92339	Tetra_16
tetur02g05480	Tetra_16
tetur03g07410	Tetra_16
tetur04g92261	Tetra_16
tetur05g01680	Tetra_16
tetur07g00720	Tetra_16
tetur09g03030	Tetra_16
tetur11g02360	Tetra_16
tetur12g00970	Tetra_16
tetur13g01490	Tetra_16
tetur17g03640	Tetra_16
tetur17g92141	Tetra_16
tetur24g01390	Tetra_16
tetur284g00020	Tetra_16
tetur39g00400	Tetra_16
tetur52g00030	Tetra_16
tetur92g00060	Tetra_16
tetur06g05120	Tetra_17
tetur12g00810	Tetra_17
tetur12g01660	Tetra_17
tetur12g01670	Tetra_17
tetur12g01680	Tetra_17
tetur12g01690	Tetra_17
tetur12g04893	Tetra_17
tetur12g04903	Tetra_17
tetur12g04010	Tetra_17
tetur12g04020	Tetra_17
tetur12g04090	Tetra_17
tetur12g04661	Tetra_17
tetur12g04703	Tetra_17
tetur12g04743	Tetra_17
tetur12g04753	Tetra_17
tetur12g04763	Tetra_17
tetur12g04773	Tetra_17
tetur12g04783	Tetra_17
tetur12g91755	Tetra_17
tetur12g04793	Tetra_17
tetur12g04803	Tetra_17
tetur12g04823	Tetra_17
tetur12g04833	Tetra_17
tetur12g04843	Tetra_17
tetur12g04853	Tetra_17
tetur265g00001	Tetra_17
tetur27g01820	Tetra_17
tetur35g00340	Tetra_17
tetur34g00390	Tetra_17
tetur34g00400	Tetra_17
tetur34g00410	Tetra_17
tetur66g00010	Tetra_17
tetur66g00090	Tetra_17
tetur66g00120	Tetra_17
tetur02g02820	Tetra_18
tetur02g02830	Tetra_18
tetur02g02840	Tetra_18
tetur02g02850	Tetra_18
tetur02g02870	Tetra_18
tetur02g02880	Tetra_18
tetur02g02900	Tetra_18
tetur02g02910	Tetra_18
tetur02g02920	Tetra_18
tetur02g02930	Tetra_18
tetur02g02940	Tetra_18
tetur02g02950	Tetra_18
tetur02g02960	Tetra_18
tetur02g03000	Tetra_18
tetur02g92507	Tetra_18
tetur136g00050	Tetra_18
tetur429g90244	Tetra_18
tetur02g92509	Tetra_18
tetur53g00070	Tetra_18
tetur57g00010	Tetra_18
tetur57g00020	Tetra_18
tetur57g00030	Tetra_18
tetur57g00040	Tetra_18
tetur57g00050	Tetra_18
tetur57g00060	Tetra_18
tetur57g00070	Tetra_18
tetur57g00090	Tetra_18
tetur57g00110	Tetra_18
tetur57g00120	Tetra_18
tetur57g00130	Tetra_18
tetur57g00140	Tetra_18
tetur57g00150	Tetra_18
tetur57g90051	Tetra_18
tetur57g90053	Tetra_18
tetur02g14280	Tetra_19
tetur02g14420	Tetra_19
tetur02g14470	Tetra_19
tetur08g03060	Tetra_19
tetur12g00580	Tetra_19
tetur13g04230	Tetra_19
tetur19g92445	Tetra_19
tetur20g00010	Tetra_19
tetur20g00020	Tetra_19
tetur20g00030	Tetra_19
tetur20g00040	Tetra_19
tetur20g00050	Tetra_19
tetur20g00090	Tetra_19
tetur20g00100	Tetra_19
tetur20g00540	Tetra_19
tetur20g00550	Tetra_19
tetur20g00560	Tetra_19
tetur19g00950	Tetra_19
tetur20g90779	Tetra_19
tetur20g90780	Tetra_19
tetur20g90781	Tetra_19
tetur19g02210	Tetra_19
tetur20g00670	Tetra_19
tetur47g00120	Tetra_19
tetur47g00170	Tetra_19
tetur43g00560	Tetra_19
tetur43g00570	Tetra_19
tetur43g00580	Tetra_19
tetur58g00010	Tetra_19
tetur58g00020	Tetra_19
tetur58g00030	Tetra_19
tetur58g00050	Tetra_19
tetur58g00090	Tetra_19
tetur58g00100	Tetra_19
tetur58g00110	Tetra_19
tetur58g90066	Tetra_19
tetur58g90067	Tetra_19
tetur04g07730	Tetra_20
tetur06g02410	Tetra_20
tetur07g06450	Tetra_20
tetur184g00040	Tetra_20
tetur188g00040	Tetra_20
tetur21g01370	Tetra_20
tetur23g00090	Tetra_20
tetur23g00100	Tetra_20
tetur23g00140	Tetra_20
tetur30g02060	Tetra_20
tetur01g02380	Tetra_21
tetur04g00380	Tetra_21
tetur04g03300	Tetra_21
tetur02g12960	Tetra_21
tetur07g91821	Tetra_21
tetur08g06380	Tetra_21
tetur09g04530	Tetra_21
tetur11g02940	Tetra_21
tetur123g00030	Tetra_21
tetur126g00020	Tetra_21
tetur16g00780	Tetra_21
tetur16g00800	Tetra_21
tetur20g02230	Tetra_21
tetur21g01950	Tetra_21
tetur22g92572	Tetra_21
tetur22g02650	Tetra_21
tetur298g00010	Tetra_21
tetur29g00960	Tetra_21
tetur340g00010	Tetra_21
tetur39g00380	Tetra_21
tetur37g00270	Tetra_21
tetur422g00010	Tetra_21
tetur43g00030	Tetra_21
tetur383g00010	Tetra_21
tetur550g00010	Tetra_21
tetur02g03490	Tetra_22
tetur02g12320	Tetra_22
tetur06g03010	Tetra_22
tetur06g03050	Tetra_22
tetur11g05440	Tetra_22
tetur11g05720	Tetra_22
tetur11g05730	Tetra_22
tetur11g05740	Tetra_22
tetur15g01400	Tetra_22
tetur15g01410	Tetra_22
tetur15g91258	Tetra_22
tetur15g91259	Tetra_22
tetur22g02110	Tetra_22
tetur22g02120	Tetra_22
tetur22g02130	Tetra_22
tetur22g02150	Tetra_22
tetur22g02170	Tetra_22
tetur22g02180	Tetra_22
tetur22g02200	Tetra_22
tetur22g02530	Tetra_22
tetur46g00010	Tetra_22
tetur01g06390	Tetra_23
tetur02g15605	Tetra_23
tetur03g02490	Tetra_23
tetur04g04980	Tetra_23
tetur07g03230	Tetra_23
tetur07g06380	Tetra_23
tetur13g00830	Tetra_23
tetur13g02750	Tetra_23
tetur13g02760	Tetra_23
tetur15g03300	Tetra_23
tetur23g01270	Tetra_23
tetur02g11310	Tetra_24
tetur03g09770	Tetra_24
tetur05g01720	Tetra_24
tetur05g01730	Tetra_24
tetur06g03420	Tetra_24
tetur11g05010	Tetra_24
tetur11g05020	Tetra_24
tetur11g05420	Tetra_24
tetur11g05450	Tetra_24
tetur15g01970	Tetra_24
tetur15g01980	Tetra_24
tetur06g03380	Tetra_24
tetur17g03460	Tetra_24
tetur17g00740	Tetra_24
tetur20g00700	Tetra_24
tetur20g00710	Tetra_24
tetur20g00720	Tetra_24
tetur20g00740	Tetra_24
tetur20g00750	Tetra_24
tetur318g00010	Tetra_24
tetur46g00020	Tetra_24
tetur20g90775	Tetra_25
tetur02g90620	Tetra_26
tetur02g90621	Tetra_26
tetur02g90624	Tetra_26
tetur02g90626	Tetra_26
tetur02g90627	Tetra_26
tetur02g90631	Tetra_26
tetur02g90632	Tetra_26
tetur02g90633	Tetra_26
tetur02g90634	Tetra_26
tetur02g90635	Tetra_26
tetur02g90636	Tetra_26
tetur02g13880	Tetra_26
tetur02g13900	Tetra_26
tetur02g13940	Tetra_26
tetur02g13950	Tetra_26
tetur02g13980	Tetra_26
tetur02g13990	Tetra_26
tetur02g14030	Tetra_26
tetur02g14040	Tetra_26
tetur05g05230	Tetra_26
tetur16g03660	Tetra_26
tetur83g00020	Tetra_26
tetur83g00030	Tetra_26
tetur83g90112	Tetra_26
tetur83g90373	Tetra_26
tetur01g05160	Tetra_27
tetur05g08660	Tetra_27
tetur05g08670	Tetra_27
tetur05g08690	Tetra_27
tetur08g02970	Tetra_27
tetur08g04460	Tetra_27
tetur17g02340	Tetra_27
tetur20g03230	Tetra_27
tetur28g01890	Tetra_27
tetur28g01900	Tetra_27
tetur38g00300	Tetra_27
tetur02g02980	Tetra_28
tetur02g14300	Tetra_28
tetur02g90642	Tetra_28
tetur03g10377	Tetra_28
tetur03g02480	Tetra_28
tetur03g02840	Tetra_28
tetur04g08990	Tetra_28
tetur06g03900	Tetra_28
tetur07g07490	Tetra_28
tetur07g06470	Tetra_28
tetur11g02840	Tetra_28
tetur11g02850	Tetra_28
tetur16g03400	Tetra_28
tetur21g00340	Tetra_28
tetur21g01380	Tetra_28
tetur21g01390	Tetra_28
tetur74g00030	Tetra_28
tetur05g09280	Tetra_29
tetur05g06300	Tetra_29
tetur05g06310	Tetra_29
tetur05g06320	Tetra_29
tetur05g06330	Tetra_29
tetur05g06340	Tetra_29
tetur05g06350	Tetra_29
tetur05g06360	Tetra_29
tetur05g06370	Tetra_29
tetur05g06380	Tetra_29
tetur05g06390	Tetra_29
tetur05g06400	Tetra_29
tetur05g06410	Tetra_29
tetur05g06420	Tetra_29
tetur05g06430	Tetra_29
tetur05g06440	Tetra_29
tetur05g06450	Tetra_29
tetur05g06460	Tetra_29
tetur05g06470	Tetra_29
tetur05g06480	Tetra_29
tetur05g92676	Tetra_29
tetur05g92677	Tetra_29
tetur05g92678	Tetra_29
tetur13g01630	Tetra_29
tetur07g03360	Tetra_30
tetur10g01020	Tetra_30
tetur12g01000	Tetra_30
tetur14g02810	Tetra_30
tetur269g00010	Tetra_30
tetur354g00010	Tetra_30
tetur44g00120	Tetra_30
tetur01g92368	Tetra_30
tetur02g07460	Tetra_31
tetur02g07480	Tetra_31
tetur02g07500	Tetra_31
tetur02g07520	Tetra_31
tetur02g07610	Tetra_31
tetur02g07680	Tetra_31
tetur02g07700	Tetra_31
tetur02g07970	Tetra_31
tetur02g08000	Tetra_31
tetur02g08050	Tetra_31
tetur02g08090	Tetra_31
tetur02g08160	Tetra_31
tetur02g09700	Tetra_31
tetur02g09750	Tetra_31
tetur02g09770	Tetra_31
tetur02g09790	Tetra_31
tetur07g04900	Tetra_31
tetur07g04910	Tetra_31
tetur07g04930	Tetra_31
tetur07g91859	Tetra_31
tetur07g04110	Tetra_31
tetur07g04250	Tetra_31
tetur07g04260	Tetra_31
tetur20g90760	Tetra_31
tetur472g00010	Tetra_31
tetur02g92490	Tetra_32
tetur03g10247	Tetra_32
tetur07g91825	Tetra_32
tetur13g04916	Tetra_32
tetur16g04209	Tetra_32
tetur31g02062	Tetra_32
tetur03g04060	Tetra_33
tetur03g04080	Tetra_33
tetur03g04090	Tetra_33
tetur03g04500	Tetra_33
tetur03g04530	Tetra_33
tetur03g04610	Tetra_33
tetur05g08600	Tetra_33
tetur07g91898	Tetra_33
tetur10g03460	Tetra_33
tetur11g01450	Tetra_33
tetur16g00450	Tetra_33
tetur02g15081	Tetra_34
tetur02g15327	Tetra_34
tetur02g90644	Tetra_34
tetur02g90646	Tetra_34
tetur02g90647	Tetra_34
tetur02g90648	Tetra_34
tetur02g90650	Tetra_34
tetur02g90651	Tetra_34
tetur02g12450	Tetra_34
tetur02g12460	Tetra_34
tetur02g14871	Tetra_34
tetur06g91357	Tetra_34
tetur06g91359	Tetra_34
tetur12g03210	Tetra_34
tetur13g92962	Tetra_34
tetur56g00020	Tetra_34
tetur56g90039	Tetra_34
tetur56g90040	Tetra_34
tetur56g90043	Tetra_34
tetur56g90044	Tetra_34
tetur56g90045	Tetra_34
tetur56g90047	Tetra_34
tetur01g12430	Tetra_35
tetur01g07430	Tetra_35
tetur01g07440	Tetra_35
tetur01g07460	Tetra_35
tetur01g07950	Tetra_35
tetur01g07960	Tetra_35
tetur01g08020	Tetra_35
tetur01g08220	Tetra_35
tetur01g08290	Tetra_35
tetur01g91174	Tetra_35
tetur01g15040	Tetra_35
tetur01g92398	Tetra_35
tetur01g92399	Tetra_35
tetur01g92402	Tetra_35
tetur01g92405	Tetra_35
tetur02g14320	Tetra_35
tetur07g03650	Tetra_35
tetur10g04090	Tetra_35
tetur47g00100	Tetra_35
tetur47g00130	Tetra_35
tetur86g00040	Tetra_35
tetur30g90546	Tetra_36
tetur30g90547	Tetra_36
tetur30g01650	Tetra_36
tetur30g01660	Tetra_36
tetur30g01680	Tetra_36
tetur30g01730	Tetra_36
tetur30g01760	Tetra_36
tetur30g01770	Tetra_36
tetur30g01780	Tetra_36
tetur30g01800	Tetra_36
tetur30g01820	Tetra_36
tetur30g01840	Tetra_36
tetur30g01870	Tetra_36
tetur30g01900	Tetra_36
tetur30g01930	Tetra_36
tetur30g02120	Tetra_36
tetur30g90541	Tetra_36
tetur30g90543	Tetra_36
tetur30g90545	Tetra_36
tetur02g03900	Tetra_37
tetur03g91588	Tetra_37
tetur04g90897	Tetra_37
tetur04g90898	Tetra_37
tetur06g00380	Tetra_37
tetur06g91341	Tetra_37
tetur06g91345	Tetra_37
tetur06g91368	Tetra_37
tetur06g91397	Tetra_37
tetur08g91671	Tetra_37
tetur08g91672	Tetra_37
tetur11g90921	Tetra_37
tetur15g91277	Tetra_37
tetur21g91204	Tetra_37
tetur21g91205	Tetra_37
tetur23g91450	Tetra_37
tetur24g92182	Tetra_37
tetur26g91081	Tetra_37
tetur369g90223	Tetra_37
tetur11g01150	Tetra_38
tetur11g01170	Tetra_38
tetur11g01200	Tetra_38
tetur11g00750	Tetra_38
tetur11g00760	Tetra_38
tetur11g00770	Tetra_38
tetur11g00810	Tetra_38
tetur11g00840	Tetra_38
tetur11g00850	Tetra_38
tetur11g00860	Tetra_38
tetur11g00880	Tetra_38
tetur11g00900	Tetra_38
tetur11g00940	Tetra_38
tetur11g00950	Tetra_38
tetur11g00960	Tetra_38
tetur11g00990	Tetra_38
tetur11g01020	Tetra_38
tetur11g01040	Tetra_38
tetur11g01080	Tetra_38
tetur11g01100	Tetra_38
tetur11g01130	Tetra_38
tetur11g06502	Tetra_38
tetur11g90923	Tetra_38
tetur11g90925	Tetra_38
tetur05g09110	Tetra_39
tetur05g09120	Tetra_39
tetur05g09010	Tetra_39
tetur05g09130	Tetra_39
tetur08g07760	Tetra_39
tetur08g07790	Tetra_39
tetur08g07920	Tetra_39
tetur08g08251	Tetra_39
tetur20g02940	Tetra_39
tetur19g02390	Tetra_39
tetur437g00010	Tetra_39
tetur43g00450	Tetra_39
tetur614g00010	Tetra_39
tetur03g03380	Tetra_40
tetur03g02690	Tetra_40
tetur04g08980	Tetra_40
tetur08g03260	Tetra_40
tetur01g13300	Tetra_40
tetur12g01440	Tetra_40
tetur17g00370	Tetra_40
tetur17g01240	Tetra_40
tetur193g00010	Tetra_40
tetur01g12060	Tetra_40
tetur19g02090	Tetra_40
tetur22g92568	Tetra_40
tetur30g02549	Tetra_40
tetur31g02010	Tetra_40
tetur63g00080	Tetra_40
tetur81g00010	Tetra_40
tetur83g00040	Tetra_40
tetur01g17194	Tetra_41
tetur02g15435	Tetra_41
tetur09g07550	Tetra_41
tetur10g01860	Tetra_41
tetur117g00090	Tetra_41
tetur15g04127	Tetra_41
tetur16g90558	Tetra_41
tetur24g92175	Tetra_41
tetur01g04350	Tetra_42
tetur08g06390	Tetra_42
tetur108g00030	Tetra_42
tetur126g00030	Tetra_42
tetur126g90126	Tetra_42
tetur161g00020	Tetra_42
tetur20g00320	Tetra_42
tetur20g02220	Tetra_42
tetur21g01940	Tetra_42
tetur22g01950	Tetra_42
tetur25g92701	Tetra_42
tetur37g00250	Tetra_42
tetur01g04340	Tetra_42
tetur451g00010	Tetra_42
tetur77g00080	Tetra_42
tetur08g01370	Tetra_43
tetur08g01380	Tetra_43
tetur08g01390	Tetra_43
tetur08g01400	Tetra_43
tetur08g01420	Tetra_43
tetur08g01440	Tetra_43
tetur08g01450	Tetra_43
tetur08g01490	Tetra_43
tetur08g01510	Tetra_43
tetur08g08299	Tetra_43
tetur08g08309	Tetra_43
tetur08g08319	Tetra_43
tetur08g08329	Tetra_43
tetur08g08379	Tetra_43
tetur01g05860	Tetra_44
tetur01g11280	Tetra_44
tetur02g05310	Tetra_44
tetur02g03030	Tetra_44
tetur02g90713	Tetra_44
tetur03g00160	Tetra_44
tetur04g08200	Tetra_44
tetur10g92061	Tetra_44
tetur146g00030	Tetra_44
tetur23g02449	Tetra_44
tetur47g00080	Tetra_44
tetur607g90275	Tetra_44
tetur11g02820	Tetra_45
tetur11g02790	Tetra_45
tetur11g02830	Tetra_45
tetur11g02800	Tetra_45
tetur11g02870	Tetra_45
tetur11g02860	Tetra_45
tetur11g02880	Tetra_45
tetur11g02890	Tetra_45
tetur11g02910	Tetra_45
tetur11g02920	Tetra_45
tetur11g02930	Tetra_45
tetur11g02950	Tetra_45
tetur11g02960	Tetra_45
tetur11g02970	Tetra_45
tetur11g02980	Tetra_45
tetur11g02990	Tetra_45
tetur11g03000	Tetra_45
tetur11g03010	Tetra_45
tetur11g90955	Tetra_45
tetur11g90956	Tetra_45
tetur11g90958	Tetra_45
tetur11g90959	Tetra_45
tetur07g00430	Tetra_46
tetur07g00440	Tetra_46
tetur07g00450	Tetra_46
tetur07g00970	Tetra_46
tetur11g01910	Tetra_46
tetur18g01530	Tetra_46
tetur02g09510	Tetra_47
tetur03g04310	Tetra_47
tetur05g01140	Tetra_47
tetur05g01150	Tetra_47
tetur07g06990	Tetra_47
tetur12g01360	Tetra_47
tetur22g92570	Tetra_47
tetur36g00050	Tetra_47
tetur39g00420	Tetra_47
tetur36g01270	Tetra_47
tetur07g00920	Tetra_49
tetur07g91900	Tetra_49
tetur377g00010	Tetra_49
tetur02g90725	Tetra_50
tetur106g00030	Tetra_50
tetur48g90016	Tetra_50
tetur46g00130	Tetra_50
tetur02g09090	Tetra_51
tetur04g03920	Tetra_51
tetur12g03920	Tetra_51
tetur30g02559	Tetra_51
tetur30g00670	Tetra_51
tetur30g01380	Tetra_51
tetur33g00060	Tetra_52
tetur03g08790	Tetra_53
tetur03g08910	Tetra_53
tetur03g08920	Tetra_53
tetur03g08930	Tetra_53
tetur03g08950	Tetra_53
tetur03g08960	Tetra_53
tetur03g08990	Tetra_53
tetur03g09010	Tetra_53
tetur598g00020	Tetra_53
tetur03g07610	Tetra_54
tetur03g07590	Tetra_54
tetur14g02720	Tetra_54
tetur31g00630	Tetra_54
tetur31g00690	Tetra_54
tetur31g00740	Tetra_54
tetur31g00770	Tetra_54
tetur31g00810	Tetra_54
tetur31g00820	Tetra_54
tetur31g00830	Tetra_54
tetur31g00850	Tetra_54
tetur31g00890	Tetra_54
tetur31g00910	Tetra_54
tetur31g01040	Tetra_54
tetur31g01060	Tetra_54
tetur31g01860	Tetra_54
tetur02g07490	Tetra_55
tetur02g07470	Tetra_55
tetur02g07530	Tetra_55
tetur02g07660	Tetra_55
tetur02g07690	Tetra_55
tetur02g07960	Tetra_55
tetur02g07990	Tetra_55
tetur02g08080	Tetra_55
tetur02g09690	Tetra_55
tetur02g09740	Tetra_55
tetur02g09780	Tetra_55
tetur02g09800	Tetra_55
tetur02g90694	Tetra_55
tetur02g14651	Tetra_55
tetur07g04890	Tetra_55
tetur07g08000	Tetra_55
tetur07g91858	Tetra_55
tetur07g04240	Tetra_55
tetur03g01350	Tetra_56
tetur04g02840	Tetra_56
tetur14g00470	Tetra_56
tetur14g00520	Tetra_56
tetur14g00530	Tetra_56
tetur18g03000	Tetra_56
tetur02g90606	Tetra_58
tetur04g90887	Tetra_58
tetur05g92657	Tetra_58
tetur11g90912	Tetra_58
tetur11g90913	Tetra_58
tetur11g90914	Tetra_58
tetur11g90918	Tetra_58
tetur72g90105	Tetra_58
tetur03g00040	Tetra_59
tetur03g00050	Tetra_59
tetur03g00070	Tetra_59
tetur08g08070	Tetra_59
tetur32g01880	Tetra_59
tetur33g00840	Tetra_59
tetur33g00850	Tetra_59
tetur33g00860	Tetra_59
tetur33g00870	Tetra_59
tetur13g02380	Tetra_60
tetur16g01670	Tetra_60
tetur266g00010	Tetra_60
tetur08g03510	Tetra_61
tetur11g02330	Tetra_61
tetur14g00460	Tetra_61
tetur15g00160	Tetra_61
tetur15g00180	Tetra_61
tetur32g00340	Tetra_61
tetur70g00030	Tetra_61
tetur01g16564	Tetra_62
tetur04g09459	Tetra_62
tetur04g09479	Tetra_62
tetur04g09489	Tetra_62
tetur04g00770	Tetra_62
tetur12g00700	Tetra_62
tetur143g00020	Tetra_62
tetur32g02287	Tetra_62
tetur32g02297	Tetra_62
tetur32g00050	Tetra_62
tetur44g00291	Tetra_62
tetur44g00301	Tetra_62
tetur86g00050	Tetra_62
tetur86g00060	Tetra_62
tetur04g06240	Tetra_64
tetur04g03150	Tetra_64
tetur06g02860	Tetra_64
tetur16g00870	Tetra_64
tetur03g00510	Tetra_65
tetur03g00570	Tetra_65
tetur03g00580	Tetra_65
tetur03g00600	Tetra_65
tetur03g00620	Tetra_65
tetur03g00790	Tetra_65
tetur03g00920	Tetra_65
tetur03g00950	Tetra_65
tetur03g00980	Tetra_65
tetur278g00040	Tetra_65
tetur01g10080	Tetra_66
tetur01g10090	Tetra_66
tetur05g04560	Tetra_66
tetur05g04580	Tetra_66
tetur16g90599	Tetra_66
tetur196g90150	Tetra_66
tetur28g01330	Tetra_66
tetur28g01360	Tetra_66
tetur28g01380	Tetra_66
tetur28g01410	Tetra_66
tetur55g00040	Tetra_66
tetur55g00090	Tetra_66
tetur05g00100	Tetra_67
tetur06g91414	Tetra_67
tetur02g06140	Tetra_68
tetur22g92584	Tetra_68
tetur30g01670	Tetra_69
tetur30g01720	Tetra_69
tetur30g01740	Tetra_69
tetur30g01750	Tetra_69
tetur30g01790	Tetra_69
tetur30g01810	Tetra_69
tetur30g01850	Tetra_69
tetur30g01860	Tetra_69
tetur30g01880	Tetra_69
tetur30g01890	Tetra_69
tetur30g02090	Tetra_69
tetur01g02640	Tetra_70
tetur01g05760	Tetra_70
tetur01g92338	Tetra_70
tetur02g07910	Tetra_70
tetur03g07190	Tetra_70
tetur05g08840	Tetra_70
tetur08g91190	Tetra_70
tetur09g04260	Tetra_70
tetur10g02200	Tetra_70
tetur11g05250	Tetra_70
tetur12g01600	Tetra_70
tetur541g00010	Tetra_70
tetur05g01960	Tetra_71
tetur188g00020	Tetra_71
tetur188g00030	Tetra_71
tetur23g91463	Tetra_71
tetur284g00010	Tetra_71
tetur311g00020	Tetra_71
tetur02g15535	Tetra_72
tetur05g07610	Tetra_72
tetur09g07580	Tetra_72
tetur10g05854	Tetra_72
tetur14g04233	Tetra_72
tetur16g90560	Tetra_72
tetur07g07140	Tetra_73
tetur14g00800	Tetra_73
tetur20g01360	Tetra_73
tetur20g01390	Tetra_73
tetur20g01400	Tetra_73
tetur20g01410	Tetra_73
tetur20g01420	Tetra_73
tetur39g00220	Tetra_73
tetur02g14310	Tetra_74
tetur04g00870	Tetra_74
tetur05g04040	Tetra_74
tetur06g04530	Tetra_74
tetur06g04550	Tetra_74
tetur06g04580	Tetra_74
tetur06g04600	Tetra_74
tetur21g01340	Tetra_74
tetur21g01410	Tetra_74
tetur21g01420	Tetra_74
tetur21g01430	Tetra_74
tetur22g02500	Tetra_74
tetur47g00140	Tetra_74
tetur03g91518	Tetra_75
tetur06g06380	Tetra_75
tetur09g06726	Tetra_75
tetur10g04800	Tetra_75
tetur128g00040	Tetra_75
tetur14g04193	Tetra_75
tetur15g00840	Tetra_75
tetur24g01320	Tetra_75
tetur04g03610	Tetra_76
tetur06g91363	Tetra_76
tetur06g91364	Tetra_76
tetur06g91366	Tetra_76
tetur07g07990	Tetra_76
tetur09g03040	Tetra_76
tetur17g92125	Tetra_76
tetur17g01220	Tetra_76
tetur34g00350	Tetra_76
tetur68g90094	Tetra_76
tetur03g91583	Tetra_80
tetur01g92421	Tetra_81
tetur07g01150	Tetra_81
tetur07g07000	Tetra_81
tetur04g03590	Tetra_81
tetur12g00990	Tetra_81
tetur14g02200	Tetra_81
tetur15g01260	Tetra_81
tetur23g00780	Tetra_81
tetur23g00790	Tetra_81
tetur267g00010	Tetra_81
tetur354g00020	Tetra_81
tetur07g07710	Tetra_82
tetur07g07730	Tetra_82
tetur01g17184	Tetra_83
tetur03g91528	Tetra_83
tetur09g07560	Tetra_83
[truncated: 13,491 more rows]

## Sheet: OrthoMCL_summary
Table S4 - OrthoMCL summary of the OrthoMCL grouping of the T. urticae proteome (and the correction for OrthoMCL group size based on OrthoMCL genes having uniquely mapping probes on the array)
genome annotation (version of August 11, 2016)			correction for genes with uniquely mapping probes on array
OrthoMCL group	Tetur IDs in OrthoMCL group	OrthoMCL group size	Tetur IDs in OrthoMCL group (array)	OrthoMCL group size (array)
Tetra_1	tetur01g01690, tetur01g01910, tetur01g05350, tetur01g11810, tetur01g11610, tetur01g14990, tetur01g13080, tetur01g13090, tetur01g13100, tetur01g13110, tetur01g13120, tetur01g13130, tetur01g07920, tetur01g07970, tetur01g07990, tetur01g08000, tetur01g08030, tetur01g08040, tetur01g08070, tetur01g08080, tetur01g08090, tetur01g08100, tetur01g08130, tetur01g08140, tetur01g08150, tetur01g08170, tetur01g0…	209	tetur01g01690, tetur01g05350, tetur01g07920, tetur01g07970, tetur01g07990, tetur01g08000, tetur01g08030, tetur01g08040, tetur01g08070, tetur01g08080, tetur01g08090, tetur01g08130, tetur01g08140, tetur01g08150, tetur01g08170, tetur01g08180, tetur01g08240, tetur01g08370, tetur01g11610, tetur01g11810, tetur01g13080, tetur01g13090, tetur01g13100, tetur01g13110, tetur01g13120, tetur01g13130, tetur01g1…	144
Tetra_10	tetur01g01400, tetur01g07520, tetur01g16714, tetur04g08780, tetur07g08057, tetur07g08067, tetur07g08077, tetur08g00330, tetur08g07160, tetur09g03430, tetur09g06728, tetur09g06789, tetur16g00670, tetur17g03040, tetur17g92124, tetur19g03411, tetur24g01040, tetur27g01920, tetur29g01290, tetur30g02429, tetur30g02439, tetur30g02449, tetur30g02459, tetur30g02469, tetur30g02479, tetur41g00690, tetur41g0…	27	tetur01g01400, tetur01g07520, tetur01g16714, tetur04g08780, tetur07g08057, tetur07g08067, tetur07g08077, tetur08g00330, tetur08g07160, tetur09g03430, tetur09g06728, tetur09g06789, tetur16g00670, tetur17g03040, tetur19g03411, tetur24g01040, tetur27g01920, tetur29g01290, tetur30g02429, tetur30g02439, tetur30g02459, tetur30g02469, tetur30g02479, tetur41g00690, tetur41g00720	25
Tetra_100	tetur11g02320, tetur11g02340, tetur26g02210, tetur32g00830	4	tetur11g02320, tetur11g02340, tetur26g02210, tetur32g00830	4
Tetra_1000	tetur10g03240	1	tetur10g03240	1
Tetra_1001	tetur10g03170	1	tetur10g03170	1
Tetra_985	tetur41g00600	1	no unique probes on array	-
Tetra_1004	tetur11g03610	1	tetur11g03610	1
Tetra_1005	tetur11g03650	1	tetur11g03650	1
Tetra_1006	tetur11g03660	1	tetur11g03660	1
Tetra_1007	tetur11g03790	1	tetur11g03790	1
Tetra_1008	tetur11g03990	1	tetur11g03990	1
Tetra_1009	tetur11g04000	1	tetur11g04000	1
Tetra_101	tetur01g05370, tetur01g05380, tetur01g05450, tetur01g11300, tetur06g02280, tetur08g03800, tetur08g03820, tetur24g02080	8	tetur01g05370, tetur01g05380, tetur01g05450, tetur01g11300, tetur06g02280, tetur08g03800, tetur08g03820, tetur24g02080	8
Tetra_1010	tetur11g04090	1	tetur11g04090	1
Tetra_1011	tetur06g03690	1	tetur06g03690	1
Tetra_1012	tetur08g04680	1	tetur08g04680	1
Tetra_1013	tetur11g05130	1	tetur11g05130	1
Tetra_1014	tetur12g00870	1	tetur12g00870	1
Tetra_1016	tetur05g01880	1	tetur05g01880	1
Tetra_1017	tetur08g02600	1	tetur08g02600	1
Tetra_1018	tetur08g02610	1	tetur08g02610	1
Tetra_1019	tetur08g02620	1	tetur08g02620	1
Tetra_102	tetur09g04190, tetur09g04200, tetur09g03980, tetur20g01320, tetur22g00020, tetur39g00500	6	tetur09g04200, tetur20g01320, tetur22g00020, tetur39g00500	4
Tetra_1020	tetur08g02660	1	tetur08g02660	1
Tetra_1021	tetur10g00690	1	tetur10g00690	1
Tetra_1022	tetur10g00350	1	tetur10g00350	1
Tetra_1023	tetur10g00340	1	tetur10g00340	1
Tetra_1024	tetur10g00170	1	tetur10g00170	1
Tetra_1025	tetur10g00140	1	tetur10g00140	1
Tetra_1026	tetur09g05580	1	tetur09g05580	1
Tetra_1027	tetur08g03720	1	tetur08g03720	1
Tetra_1028	tetur03g07750	1	tetur03g07750	1
Tetra_972	tetur11g90953	1	no unique probes on array	-
Tetra_103	tetur01g15470, tetur01g15480, tetur01g15490, tetur01g15500, tetur01g15520, tetur01g15530, tetur01g15540, tetur04g07430, tetur12g01520	9	tetur01g15470, tetur01g15480, tetur01g15490, tetur01g15500, tetur01g15520, tetur01g15530, tetur01g15540, tetur04g07430, tetur12g01520	9
Tetra_1030	tetur24g00120	1	tetur24g00120	1
Tetra_1031	tetur24g00110	1	tetur24g00110	1
Tetra_1032	tetur07g02880	1	tetur07g02880	1
Tetra_1033	tetur07g02730	1	tetur07g02730	1
Tetra_1034	tetur07g03050	1	tetur07g03050	1
Tetra_1035	tetur07g08036	1	tetur07g08036	1
Tetra_1036	tetur28g02580	1	tetur28g02580	1
Tetra_1037	tetur28g02560	1	tetur28g02560	1
Tetra_1038	tetur28g02550	1	tetur28g02550	1
Tetra_1039	tetur07g00390	1	tetur07g00390	1
Tetra_104	tetur02g13830, tetur10g02400, tetur13g00350, tetur13g00370	4	tetur02g13830, tetur10g02400, tetur13g00350, tetur13g00370	4
Tetra_1041	tetur07g00460	1	tetur07g00460	1
Tetra_1042	tetur09g03600	1	tetur09g03600	1
Tetra_1043	tetur06g00320	1	tetur06g00320	1
Tetra_1044	tetur04g09250	1	tetur04g09250	1
Tetra_1045	tetur43g00390	1	tetur43g00390	1
Tetra_1046	tetur11g04350	1	tetur11g04350	1
Tetra_966	tetur08g07220	1	no unique probes on array	-
Tetra_1048	tetur09g06370	1	tetur09g06370	1
Tetra_1049	tetur09g06360	1	tetur09g06360	1
Tetra_105	tetur04g02990, tetur07g06780, tetur24g01940, tetur97g00010, tetur97g00040	5	tetur04g02990, tetur07g06780, tetur24g01940	3
Tetra_1050	tetur09g06300	1	tetur09g06300	1
Tetra_1051	tetur09g06220	1	tetur09g06220	1
Tetra_1052	tetur11g02550	1	tetur11g02550	1
Tetra_1053	tetur28g01590	1	tetur28g01590	1
Tetra_1054	tetur28g02050	1	tetur28g02050	1
Tetra_1055	tetur07g01760	1	tetur07g01760	1
Tetra_1056	tetur07g91887	1	tetur07g91887	1
Tetra_1057	tetur07g01970	1	tetur07g01970	1
Tetra_1058	tetur07g02000	1	tetur07g02000	1
Tetra_1059	tetur03g08080	1	tetur03g08080	1
Tetra_106	tetur28g02310, tetur28g02320, tetur28g02330, tetur28g02350, tetur28g02360	5	tetur28g02310, tetur28g02320, tetur28g02330, tetur28g02350, tetur28g02360	5
Tetra_1060	tetur01g03910	1	tetur01g03910	1
Tetra_1061	tetur01g03870	1	tetur01g03870	1
Tetra_1062	tetur01g03720	1	tetur01g03720	1
Tetra_1063	tetur01g03680	1	tetur01g03680	1
Tetra_1064	tetur01g03360	1	tetur01g03360	1
Tetra_1065	tetur01g03230	1	tetur01g03230	1
Tetra_1066	tetur01g03220	1	tetur01g03220	1
Tetra_1067	tetur01g03200	1	tetur01g03200	1
Tetra_1068	tetur01g03070	1	tetur01g03070	1
Tetra_1069	tetur01g03040	1	tetur01g03040	1
Tetra_107	tetur02g13740, tetur12g91737, tetur27g01130	3	tetur12g91737, tetur27g01130	2
Tetra_1070	tetur01g02730	1	tetur01g02730	1
Tetra_1071	tetur01g02540	1	tetur01g02540	1
Tetra_1072	tetur01g02060	1	tetur01g02060	1
Tetra_1073	tetur01g02020	1	tetur01g02020	1
Tetra_1074	tetur18g02520	1	tetur18g02520	1
Tetra_1075	tetur18g02370	1	tetur18g02370	1
Tetra_950	tetur01g92407	1	no unique probes on array	-
Tetra_1077	tetur18g02230	1	tetur18g02230	1
Tetra_1078	tetur18g02180	1	tetur18g02180	1
Tetra_1079	tetur18g02130	1	tetur18g02130	1
Tetra_944	tetur92g00050	1	no unique probes on array	-
Tetra_1081	tetur18g02110	1	tetur18g02110	1
Tetra_1082	tetur02g04490	1	tetur02g04490	1
Tetra_1083	tetur27g01170	1	tetur27g01170	1
Tetra_1084	tetur23g01090	1	tetur23g01090	1
Tetra_1085	tetur01g15450	1	tetur01g15450	1
Tetra_1086	tetur01g91178	1	tetur01g91178	1
Tetra_1087	tetur02g03600	1	tetur02g03600	1
Tetra_1088	tetur02g03580	1	tetur02g03580	1
Tetra_1089	tetur02g03470	1	tetur02g03470	1
Tetra_90	tetur24g92176	1	no unique probes on array	-
Tetra_1090	tetur18g01910	1	tetur18g01910	1
Tetra_1091	tetur18g01740	1	tetur18g01740	1
Tetra_1092	tetur04g09100	1	tetur04g09100	1
Tetra_891	tetur28g00310	1	no unique probes on array	-
Tetra_89	tetur01g17094, tetur02g15545, tetur28g02711	3	no unique probes on array	-
Tetra_1095	tetur29g01560	1	tetur29g01560	1
Tetra_1096	tetur29g00360	1	tetur29g00360	1
Tetra_1097	tetur29g00480	1	tetur29g00480	1
Tetra_1098	tetur29g00640	1	tetur29g00640	1
Tetra_1099	tetur29g00710	1	tetur29g00710	1
Tetra_11	tetur01g01020, tetur01g01030, tetur01g01040, tetur01g01070, tetur01g02290, tetur01g11490, tetur01g14980, tetur01g15350, tetur03g02130, tetur04g09689, tetur04g02740, tetur04g06350, tetur04g03870, tetur06g03730, tetur06g03790, tetur08g03130, tetur09g05900, tetur09g05910, tetur10g02440, tetur13g00530, tetur19g03391, tetur24g00040, tetur24g01660, tetur25g00590, tetur35g00410, tetur41g00660, tetur43g0…	30	tetur01g01020, tetur01g01030, tetur01g01040, tetur01g01070, tetur01g11490, tetur01g14980, tetur01g15350, tetur03g02130, tetur04g02740, tetur04g03870, tetur04g06350, tetur06g03730, tetur06g03790, tetur08g03130, tetur09g05910, tetur10g02440, tetur19g03391, tetur25g00590, tetur35g00410, tetur41g00660, tetur43g00480, tetur43g00500, tetur577g00020	23
Tetra_110	tetur20g90774, tetur20g90776	2	tetur20g90776	1
Tetra_1100	tetur29g00760	1	tetur29g00760	1
Tetra_1101	tetur29g00850	1	tetur29g00850	1
Tetra_1102	tetur01g12890	1	tetur01g12890	1
Tetra_1103	tetur01g00530	1	tetur01g00530	1
Tetra_1104	tetur18g01370	1	tetur18g01370	1
Tetra_1105	tetur18g01310	1	tetur18g01310	1
Tetra_1106	tetur07g07330	1	tetur07g07330	1
Tetra_1107	tetur07g07090	1	tetur07g07090	1
Tetra_1108	tetur18g00690	1	tetur18g00690	1
Tetra_1109	tetur18g00470	1	tetur18g00470	1
Tetra_111	tetur18g00340, tetur43g00020, tetur43g00080, tetur39g00730, tetur39g00780, tetur39g90795	6	tetur39g00730, tetur39g00780, tetur39g90795, tetur43g00080	4
Tetra_1111	tetur02g03320	1	tetur02g03320	1
Tetra_1113	tetur08g01590	1	tetur08g01590	1
Tetra_1114	tetur08g01630	1	tetur08g01630	1
Tetra_1115	tetur06g03200	1	tetur06g03200	1
Tetra_1116	tetur10g04370	1	tetur10g04370	1
Tetra_1117	tetur01g09510	1	tetur01g09510	1
Tetra_1118	tetur01g09530	1	tetur01g09530	1
Tetra_1119	tetur26g02260	1	tetur26g02260	1
Tetra_112	tetur14g03160, tetur14g03170, tetur14g03240, tetur14g03250, tetur14g03560, tetur14g03430, tetur14g02600, tetur517g00010	8	tetur14g02600, tetur14g03160, tetur14g03170, tetur14g03240, tetur14g03250, tetur14g03430, tetur14g03560, tetur517g00010	8
Tetra_1120	tetur11g04510	1	tetur11g04510	1
Tetra_1121	tetur11g04520	1	tetur11g04520	1
Tetra_886	tetur22g02010	1	no unique probes on array	-
Tetra_1123	tetur06g05630	1	tetur06g05630	1
Tetra_1124	tetur11g02130	1	tetur11g02130	1
Tetra_1125	tetur01g10160	1	tetur01g10160	1
Tetra_1127	tetur19g00110	1	tetur19g00110	1
Tetra_1128	tetur01g09800	1	tetur01g09800	1
Tetra_876	tetur31g00330	1	no unique probes on array	-
Tetra_113	tetur01g04620, tetur03g04710, tetur06g06040, tetur11g00020, tetur19g01740, tetur20g00490, tetur24g01430, tetur291g00010	8	tetur01g04620, tetur03g04710, tetur06g06040, tetur11g00020, tetur19g01740, tetur20g00490, tetur24g01430, tetur291g00010	8
Tetra_1130	tetur23g01340	1	tetur23g01340	1
Tetra_869	tetur01g92389	1	no unique probes on array	-
Tetra_1132	tetur23g01180	1	tetur23g01180	1
Tetra_1133	tetur26g01920	1	tetur26g01920	1
Tetra_1134	tetur61g00010	1	tetur61g00010	1
Tetra_1135	tetur04g01240	1	tetur04g01240	1
Tetra_1136	tetur06g05390	1	tetur06g05390	1
Tetra_1137	tetur06g05370	1	tetur06g05370	1
Tetra_1138	tetur06g05360	1	tetur06g05360	1
Tetra_1139	tetur06g05320	1	tetur06g05320	1
Tetra_114	tetur14g00480, tetur14g00510, tetur14g92996, tetur14g92997, tetur14g92998, tetur14g00620, tetur14g00740, tetur410g00010	8	tetur14g00480, tetur14g00620, tetur14g00740, tetur14g92996, tetur410g00010	5
Tetra_1140	tetur06g05210	1	tetur06g05210	1
Tetra_1141	tetur23g02040	1	tetur23g02040	1
Tetra_1142	tetur23g01910	1	tetur23g01910	1
Tetra_1143	tetur23g01850	1	tetur23g01850	1
Tetra_1144	tetur23g01780	1	tetur23g01780	1
Tetra_86	tetur02g15515, tetur03g10267, tetur32g90854, tetur59g00080, tetur59g00090	5	no unique probes on array	-
Tetra_1146	tetur07g06940	1	tetur07g06940	1
Tetra_1147	tetur07g06910	1	tetur07g06910	1
Tetra_1148	tetur07g06900	1	tetur07g06900	1
Tetra_1149	tetur07g06300	1	tetur07g06300	1
Tetra_115	tetur06g02940, tetur06g01610, tetur06g03030, tetur06g03070, tetur06g03530, tetur21g03160, tetur21g03170, tetur21g03190, tetur21g03340	9	tetur06g01610, tetur06g02940, tetur06g03030, tetur06g03070, tetur06g03530, tetur21g03160, tetur21g03170, tetur21g03190, tetur21g03340	9
Tetra_1150	tetur07g06250	1	tetur07g06250	1
Tetra_1151	tetur27g01120	1	tetur27g01120	1
Tetra_1152	tetur14g00330	1	tetur14g00330	1
Tetra_1153	tetur04g06940	1	tetur04g06940	1
Tetra_854	tetur13g04986	1	no unique probes on array	-
Tetra_1155	tetur10g01780	1	tetur10g01780	1
Tetra_851	tetur09g05330	1	no unique probes on array	-
Tetra_1157	tetur25g01900	1	tetur25g01900	1
Tetra_1158	tetur01g04710	1	tetur01g04710	1
Tetra_1159	tetur05g03120	1	tetur05g03120	1
Tetra_116	tetur09g05180, tetur09g05220, tetur09g05230, tetur09g05240, tetur09g05250, tetur09g05260, tetur09g06240, tetur21g91201, tetur352g00040	9	tetur09g05180, tetur09g05220, tetur09g05230, tetur09g05240, tetur09g05250, tetur09g05260, tetur09g06240	7
Tetra_1160	tetur05g02880	1	tetur05g02880	1
Tetra_1161	tetur25g01890	1	tetur25g01890	1
Tetra_1162	tetur01g04850	1	tetur01g04850	1
Tetra_1163	tetur01g05120	1	tetur01g05120	1
Tetra_845	tetur21g03410	1	no unique probes on array	-
Tetra_1165	tetur01g05490	1	tetur01g05490	1
Tetra_1166	tetur01g05540	1	tetur01g05540	1
Tetra_1167	tetur04g08280	1	tetur04g08280	1
Tetra_1168	tetur04g08260	1	tetur04g08260	1
Tetra_1169	tetur15g91268	1	tetur15g91268	1
Tetra_117	tetur13g04070, tetur13g04130, tetur13g04160	3	tetur13g04070, tetur13g04130, tetur13g04160	3
Tetra_84	tetur20g01490	1	no unique probes on array	-
Tetra_1171	tetur06g03850	1	tetur06g03850	1
Tetra_833	tetur04g09380	1	no unique probes on array	-
Tetra_1173	tetur10g01090	1	tetur10g01090	1
Tetra_1174	tetur10g01130	1	tetur10g01130	1
Tetra_1175	tetur10g01190	1	tetur10g01190	1
Tetra_1176	tetur10g01270	1	tetur10g01270	1
Tetra_1177	tetur10g01430	1	tetur10g01430	1
Tetra_1178	tetur10g01470	1	tetur10g01470	1
Tetra_83	tetur01g17184, tetur03g91528, tetur09g07560, tetur16g04199, tetur70g00060	5	no unique probes on array	-
Tetra_118	tetur03g08450, tetur03g08460, tetur03g08470, tetur03g09640, tetur38g00723	5	tetur03g09640, tetur38g00723	2
Tetra_1180	tetur10g01500	1	tetur10g01500	1
Tetra_1181	tetur15g02810	1	tetur15g02810	1
Tetra_1182	tetur01g10450	1	tetur01g10450	1
Tetra_1183	tetur15g02920	1	tetur15g02920	1
Tetra_1184	tetur15g02940	1	tetur15g02940	1
Tetra_1185	tetur15g04117	1	tetur15g04117	1
Tetra_1186	tetur15g03130	1	tetur15g03130	1
Tetra_1187	tetur12g02090	1	tetur12g02090	1
Tetra_1188	tetur12g01950	1	tetur12g01950	1
Tetra_1189	tetur12g01780	1	tetur12g01780	1
Tetra_119	tetur06g06390, tetur09g06727, tetur15g00850, tetur30g00720	4	tetur06g06390, tetur09g06727, tetur15g00850, tetur30g00720	4
Tetra_821	tetur16g90564	1	no unique probes on array	-
Tetra_1191	tetur03g01410	1	tetur03g01410	1
Tetra_1192	tetur07g01700	1	tetur07g01700	1
Tetra_1193	tetur12g03470	1	tetur12g03470	1
Tetra_1194	tetur12g03390	1	tetur12g03390	1
Tetra_1195	tetur12g03380	1	tetur12g03380	1
Tetra_1196	tetur12g03060	1	tetur12g03060	1
Tetra_1197	tetur12g02370	1	tetur12g02370	1
Tetra_1198	tetur03g01070	1	tetur03g01070	1
Tetra_1199	tetur09g01560	1	tetur09g01560	1
Tetra_12	tetur01g92300, tetur01g92369, tetur02g07810, tetur03g00190, tetur03g07970, tetur04g05550, tetur04g05960, tetur04g07270, tetur07g07120, tetur08g04090, tetur09g04520, tetur123g00020, tetur12g00950, tetur17g02360, tetur21g03070, tetur23g91462, tetur27g02240, tetur654g00010	18	tetur02g07810, tetur03g00190, tetur03g07970, tetur04g05550, tetur04g05960, tetur04g07270, tetur07g07120, tetur08g04090, tetur09g04520, tetur123g00020, tetur12g00950, tetur17g02360, tetur21g03070, tetur27g02240, tetur654g00010	15
Tetra_120	tetur05g06940, tetur07g07370, tetur10g02150	3	tetur05g06940, tetur10g02150	2
Tetra_1200	tetur09g01920	1	tetur09g01920	1
Tetra_1201	tetur09g02020	1	tetur09g02020	1
Tetra_1202	tetur09g02200	1	tetur09g02200	1
Tetra_1203	tetur04g07700	1	tetur04g07700	1
Tetra_1204	tetur12g01150	1	tetur12g01150	1
Tetra_1205	tetur01g14490	1	tetur01g14490	1
Tetra_1206	tetur01g14520	1	tetur01g14520	1
Tetra_1207	tetur01g14690	1	tetur01g14690	1
Tetra_1208	tetur01g14700	1	tetur01g14700	1
Tetra_1210	tetur06g01460	1	tetur06g01460	1
Tetra_1211	tetur06g01560	1	tetur06g01560	1
Tetra_812	tetur02g10400	1	no unique probes on array	-
Tetra_1213	tetur02g00560	1	tetur02g00560	1
Tetra_1214	tetur02g00710	1	tetur02g00710	1
Tetra_1215	tetur02g00480	1	tetur02g00480	1
Tetra_1216	tetur05g04210	1	tetur05g04210	1
Tetra_1217	tetur05g04180	1	tetur05g04180	1
Tetra_1218	tetur05g03750	1	tetur05g03750	1
Tetra_1219	tetur05g03600	1	tetur05g03600	1
Tetra_80	tetur03g91583	1	no unique probes on array	-
Tetra_1222	tetur21g01780	1	tetur21g01780	1
Tetra_1223	tetur21g01790	1	tetur21g01790	1
Tetra_1224	tetur20g01740	1	tetur20g01740	1
Tetra_1225	tetur20g01720	1	tetur20g01720	1
Tetra_1226	tetur20g01630	1	tetur20g01630	1
Tetra_1227	tetur20g01840	1	tetur20g01840	1
Tetra_1228	tetur20g01860	1	tetur20g01860	1
Tetra_1229	tetur05g08190	1	tetur05g08190	1
Tetra_123	tetur04g08600, tetur15g00140, tetur28g01930	3	tetur04g08600, tetur15g00140, tetur28g01930	3
Tetra_1230	tetur05g08220	1	tetur05g08220	1
Tetra_795	tetur01g11500	1	no unique probes on array	-
Tetra_1232	tetur09g01140	1	tetur09g01140	1
Tetra_792	tetur11g05830	1	no unique probes on array	-
Tetra_1234	tetur20g01220	1	tetur20g01220	1
Tetra_1235	tetur20g01250	1	tetur20g01250	1
Tetra_1236	tetur20g01460	1	tetur20g01460	1
Tetra_1237	tetur20g01580	1	tetur20g01580	1
Tetra_1238	tetur13g00460	1	tetur13g00460	1
Tetra_1239	tetur13g00880	1	tetur13g00880	1
Tetra_124	tetur01g04610, tetur16g03860, tetur19g01750	3	tetur01g04610, tetur16g03860, tetur19g01750	3
Tetra_1240	tetur13g00740	1	tetur13g00740	1
Tetra_1241	tetur13g00620	1	tetur13g00620	1
Tetra_791	tetur37g00690	1	no unique probes on array	-
Tetra_1243	tetur02g05290	1	tetur02g05290	1
Tetra_778	tetur29g00020	1	no unique probes on array	-
Tetra_1245	tetur02g04710	1	tetur02g04710	1
Tetra_1246	tetur08g05750	1	tetur08g05750	1
Tetra_1247	tetur05g04080	1	tetur05g04080	1
Tetra_1248	tetur14g01970	1	tetur14g01970	1
Tetra_1249	tetur14g01900	1	tetur14g01900	1
Tetra_125	tetur11g05360, tetur13g00820, tetur13g02220	3	tetur11g05360, tetur13g00820, tetur13g02220	3
Tetra_1250	tetur14g01860	1	tetur14g01860	1
Tetra_775	tetur08g00360	1	no unique probes on array	-
Tetra_1252	tetur21g00100	1	tetur21g00100	1
Tetra_1254	tetur21g00670	1	tetur21g00670	1
Tetra_1255	tetur21g00820	1	tetur21g00820	1
Tetra_763	tetur05g01200	1	no unique probes on array	-
Tetra_1257	tetur09g00070	1	tetur09g00070	1
Tetra_1259	tetur13g00210	1	tetur13g00210	1
Tetra_126	tetur09g00050, tetur09g00100, tetur09g01630	3	tetur09g00050, tetur09g00100	2
Tetra_1260	tetur27g01570	1	tetur27g01570	1
Tetra_1261	tetur27g01700	1	tetur27g01700	1
Tetra_1262	tetur27g01770	1	tetur27g01770	1
Tetra_1263	tetur27g01830	1	tetur27g01830	1
Tetra_1264	tetur27g01960	1	tetur27g01960	1
Tetra_1265	tetur07g01020	1	tetur07g01020	1
Tetra_762	tetur35g91793	1	no unique probes on array	-
Tetra_1267	tetur07g01220	1	tetur07g01220	1
Tetra_1268	tetur10g02190	1	tetur10g02190	1
Tetra_1269	tetur10g02590	1	tetur10g02590	1
Tetra_127	tetur03g07110, tetur05g02180, tetur07g91848, tetur12g91770, tetur25g92721, tetur35g91777	6	tetur03g07110, tetur05g02180	2
Tetra_758	tetur188g00010	1	no unique probes on array	-
Tetra_1272	tetur10g02700	1	tetur10g02700	1
Tetra_1273	tetur14g00360	1	tetur14g00360	1
Tetra_1274	tetur14g00260	1	tetur14g00260	1
Tetra_1275	tetur22g00120	1	tetur22g00120	1
Tetra_734	tetur16g90589	1	no unique probes on array	-
Tetra_1277	tetur10g03820	1	tetur10g03820	1
Tetra_1278	tetur03g02560	1	tetur03g02560	1
Tetra_1279	tetur03g02910	1	tetur03g02910	1
Tetra_128	tetur04g06630, tetur11g00190, tetur33g00420	3	tetur04g06630, tetur11g00190, tetur33g00420	3
Tetra_1280	tetur03g04780	1	tetur03g04780	1
Tetra_1281	tetur08g01280	1	tetur08g01280	1
Tetra_729	tetur08g02990	1	no unique probes on array	-
Tetra_1283	tetur12g03750	1	tetur12g03750	1
Tetra_1284	tetur03g03010	1	tetur03g03010	1
Tetra_1285	tetur03g03070	1	tetur03g03070	1
Tetra_715	tetur22g02280	1	no unique probes on array	-
Tetra_1287	tetur04g01210	1	tetur04g01210	1
Tetra_1288	tetur04g01580	1	tetur04g01580	1
Tetra_713	tetur20g00650	1	no unique probes on array	-
Tetra_1290	tetur37g00380	1	tetur37g00380	1
Tetra_1291	tetur01g06910	1	tetur01g06910	1
Tetra_1292	tetur12g03700	1	tetur12g03700	1
Tetra_681	tetur26g01200	1	no unique probes on array	-
Tetra_1294	tetur07g05280	1	tetur07g05280	1
Tetra_1295	tetur14g02440	1	tetur14g02440	1
Tetra_1296	tetur14g02400	1	tetur14g02400	1
Tetra_1297	tetur14g02360	1	tetur14g02360	1
Tetra_1298	tetur19g02450	1	tetur19g02450	1
Tetra_1299	tetur19g02340	1	tetur19g02340	1
Tetra_13	tetur04g09577, tetur04g09618, tetur04g02860, tetur04g04020, tetur04g04060, tetur04g04070, tetur04g04080, tetur04g04090, tetur04g04120, tetur04g01310, tetur04g01320, tetur04g01350, tetur04g01360, tetur10g05440, tetur10g05450, tetur17g00110, tetur17g00130, tetur17g00250, tetur17g00260, tetur17g00270, tetur17g00320, tetur17g00340, tetur16g02540, tetur20g02810, tetur20g02820, tetur24g02600, tetur24g0…	30	tetur04g01310, tetur04g01320, tetur04g01350, tetur04g04020, tetur04g04060, tetur04g04070, tetur04g04080, tetur04g04090, tetur17g00260, tetur17g00270, tetur17g00320, tetur17g00340, tetur20g02810, tetur20g02820, tetur310g00010	15
Tetra_130	tetur08g91191, tetur15g00010, tetur16g00610, tetur16g00620, tetur39g00150, tetur44g90871	6	tetur15g00010, tetur16g00610, tetur16g00620	3
Tetra_1300	tetur19g02280	1	tetur19g02280	1
Tetra_1301	tetur19g02250	1	tetur19g02250	1
Tetra_1302	tetur07g01560	1	tetur07g01560	1
Tetra_1303	tetur07g01600	1	tetur07g01600	1
Tetra_1304	tetur07g01650	1	tetur07g01650	1
Tetra_1305	tetur18g03140	1	tetur18g03140	1
Tetra_1306	tetur02g06190	1	tetur02g06190	1
Tetra_1307	tetur19g03310	1	tetur19g03310	1
Tetra_1308	tetur19g03230	1	tetur19g03230	1
Tetra_1309	tetur30g01220	1	tetur30g01220	1
Tetra_131	tetur04g06480, tetur08g03050, tetur19g01990	3	tetur04g06480, tetur08g03050	2
Tetra_1310	tetur20g02800	1	tetur20g02800	1
Tetra_1311	tetur20g02960	1	tetur20g02960	1
Tetra_655	tetur25g00570	1	no unique probes on array	-
Tetra_1313	tetur18g03420	1	tetur18g03420	1
Tetra_1314	tetur06g04830	1	tetur06g04830	1
Tetra_1315	tetur03g07330	1	tetur03g07330	1
Tetra_1316	tetur03g07300	1	tetur03g07300	1
Tetra_1317	tetur02g05820	1	tetur02g05820	1
Tetra_1318	tetur02g05830	1	tetur02g05830	1
Tetra_1319	tetur02g07000	1	tetur02g07000	1
Tetra_132	tetur02g09290, tetur08g04650, tetur11g03800	3	tetur02g09290, tetur08g04650, tetur11g03800	3
Tetra_1322	tetur22g01160	1	tetur22g01160	1
Tetra_1323	tetur22g01270	1	tetur22g01270	1
Tetra_1324	tetur22g01380	1	tetur22g01380	1
Tetra_1325	tetur11g00710	1	tetur11g00710	1
Tetra_1326	tetur11g01990	1	tetur11g01990	1
Tetra_1327	tetur11g01930	1	tetur11g01930	1
Tetra_1328	tetur11g01690	1	tetur11g01690	1
Tetra_1329	tetur11g01660	1	tetur11g01660	1
Tetra_1330	tetur02g12090	1	tetur02g12090	1
Tetra_1331	tetur02g12240	1	tetur02g12240	1
Tetra_652	tetur25g92704	1	no unique probes on array	-
Tetra_1333	tetur23g00410	1	tetur23g00410	1
Tetra_1334	tetur16g02750	1	tetur16g02750	1
Tetra_1335	tetur16g02190	1	tetur16g02190	1
Tetra_1336	tetur16g02170	1	tetur16g02170	1
Tetra_1337	tetur16g01750	1	tetur16g01750	1
Tetra_1338	tetur16g01580	1	tetur16g01580	1
Tetra_1339	tetur03g03880	1	tetur03g03880	1
Tetra_134	tetur01g16320, tetur118g00010, tetur238g00020, tetur22g02971	4	tetur01g16320	1
Tetra_1340	tetur03g03870	1	tetur03g03870	1
Tetra_631	tetur04g92247	1	no unique probes on array	-
Tetra_1342	tetur03g03900	1	tetur03g03900	1
Tetra_626	tetur13g03490	1	no unique probes on array	-
Tetra_1345	tetur05g07700	1	tetur05g07700	1
Tetra_1346	tetur33g00470	1	tetur33g00470	1
Tetra_1347	tetur33g00750	1	tetur33g00750	1
Tetra_1348	tetur33g00790	1	tetur33g00790	1
Tetra_1349	tetur33g00910	1	tetur33g00910	1
Tetra_135	tetur163g90414, tetur39g00370	2	tetur163g90414, tetur39g00370	2
Tetra_1350	tetur14g01510	1	tetur14g01510	1
Tetra_1351	tetur14g01650	1	tetur14g01650	1
Tetra_1352	tetur02g01380	1	tetur02g01380	1
Tetra_1353	tetur20g00930	1	tetur20g00930	1
Tetra_1354	tetur02g01120	1	tetur02g01120	1
Tetra_588	tetur04g04670	1	no unique probes on array	-
Tetra_1356	tetur02g01660	1	tetur02g01660	1
Tetra_1357	tetur02g01750	1	tetur02g01750	1
Tetra_1358	tetur21g02470	1	tetur21g02470	1
Tetra_1359	tetur21g02520	1	tetur21g02520	1
Tetra_136	tetur03g91523, tetur03g04400, tetur03g07130, tetur17g92155, tetur26g02790, tetur28g02741	6	tetur03g04400, tetur03g07130	2
Tetra_1360	tetur32g02040	1	tetur32g02040	1
Tetra_1361	tetur32g02050	1	tetur32g02050	1
Tetra_1362	tetur33g00340	1	tetur33g00340	1
Tetra_1363	tetur31g01780	1	tetur31g01780	1
Tetra_585	tetur17g92114	1	no unique probes on array	-
Tetra_1365	tetur578g00020	1	tetur578g00020	1
Tetra_1366	tetur06g03910	1	tetur06g03910	1
Tetra_1367	tetur02g13100	1	tetur02g13100	1
Tetra_1368	tetur07g04060	1	tetur07g04060	1
Tetra_1369	tetur15g01950	1	tetur15g01950	1
Tetra_137	tetur08g02100, tetur23g91464, tetur24g00980, tetur35g91790	4	tetur08g02100, tetur24g00980	2
Tetra_1370	tetur15g01890	1	tetur15g01890	1
Tetra_1371	tetur15g01850	1	tetur15g01850	1
Tetra_1372	tetur15g01780	1	tetur15g01780	1
Tetra_58	tetur02g90606, tetur04g90887, tetur05g92657, tetur11g90912, tetur11g90913, tetur11g90914, tetur11g90918, tetur72g90105	8	no unique probes on array	-
Tetra_579	tetur18g03600	1	no unique probes on array	-
Tetra_578	tetur24g01350	1	no unique probes on array	-
Tetra_1376	tetur04g03090	1	tetur04g03090	1
Tetra_1377	tetur02g09210	1	tetur02g09210	1
Tetra_1378	tetur02g09520	1	tetur02g09520	1
Tetra_1379	tetur01g12690	1	tetur01g12690	1
Tetra_138	tetur01g05600, tetur01g05590, tetur114g00030, tetur114g00040, tetur175g00010, tetur199g00010, tetur34g00030	7	tetur01g05590, tetur01g05600, tetur114g00030, tetur114g00040, tetur175g00010, tetur199g00010, tetur34g00030	7
Tetra_1380	tetur01g16530	1	tetur01g16530	1
Tetra_576	tetur24g01820	1	no unique probes on array	-
Tetra_1382	tetur01g12380	1	tetur01g12380	1
Tetra_566	tetur08g03330	1	no unique probes on array	-
Tetra_1384	tetur01g12190	1	tetur01g12190	1
Tetra_1385	tetur35g00710	1	tetur35g00710	1
Tetra_1386	tetur05g08800	1	tetur05g08800	1
Tetra_1387	tetur05g08810	1	tetur05g08810	1
Tetra_1388	tetur05g08710	1	tetur05g08710	1
Tetra_1389	tetur05g08680	1	tetur05g08680	1
Tetra_139	tetur01g92316, tetur02g92513, tetur04g00460, tetur05g92699, tetur110g00020, tetur11g02900, tetur17g02430, tetur30g01060	8	tetur04g00460, tetur11g02900, tetur17g02430, tetur30g01060	4
Tetra_1390	tetur30g00830	1	tetur30g00830	1
Tetra_1391	tetur04g02650	1	tetur04g02650	1
Tetra_1392	tetur19g02070	1	tetur19g02070	1
Tetra_1393	tetur02g04050	1	tetur02g04050	1
Tetra_1394	tetur02g03980	1	tetur02g03980	1
Tetra_1395	tetur33g01570	1	tetur33g01570	1
Tetra_1396	tetur33g01360	1	tetur33g01360	1
Tetra_1397	tetur33g01230	1	tetur33g01230	1
Tetra_1398	tetur01g03560	1	tetur01g03560	1
Tetra_1399	tetur05g08510	1	tetur05g08510	1
Tetra_14	tetur01g05060, tetur03g09090, tetur03g09100, tetur03g09110, tetur04g02760, tetur10g02840, tetur10g05784, tetur11g01980, tetur11g04930, tetur11g06420, tetur13g04696, tetur13g03050, tetur13g03090, tetur13g03110, tetur14g00710, tetur19g03401, tetur26g02843	17	tetur01g05060, tetur03g09090, tetur03g09100, tetur03g09110, tetur04g02760, tetur10g02840, tetur11g04930, tetur13g03050, tetur13g03090, tetur13g03110, tetur13g04696, tetur14g00710	12
Tetra_140	tetur09g03400, tetur10g01880, tetur03g91524, tetur19g92458, tetur70g00020, tetur16g90586, tetur09g92890	7	tetur09g03400, tetur10g01880, tetur70g00020	3
Tetra_1400	tetur41g00380	1	tetur41g00380	1
Tetra_565	tetur26g91096	1	no unique probes on array	-
Tetra_1402	tetur01g04970, tetur01g04980, tetur01g92357	3	tetur01g04980	1
Tetra_557	tetur03g03310	1	no unique probes on array	-
Tetra_1404	tetur01g11160	1	tetur01g11160	1
Tetra_1405	tetur01g13140, tetur01g04640, tetur01g16964	3	tetur01g04640	1
Tetra_554	tetur24g01540	1	no unique probes on array	-
Tetra_548	tetur13g92983	1	no unique probes on array	-
Tetra_1408	tetur02g00240, tetur02g00230, tetur01g06680	3	tetur01g06680, tetur02g00230, tetur02g00240	3
Tetra_1409	tetur02g01480, tetur02g01490	2	tetur02g01480, tetur02g01490	2
Tetra_141	tetur23g01430, tetur23g01480, tetur27g02588	3	tetur23g01430, tetur27g02588	2
Tetra_531	tetur21g91214	1	no unique probes on array	-
Tetra_1411	tetur02g04740	1	tetur02g04740	1
Tetra_1412	tetur02g07220, tetur03g91608	2	tetur02g07220	1
Tetra_1413	tetur02g08040, tetur02g07940, tetur02g07930	3	tetur02g07930, tetur02g07940, tetur02g08040	3
Tetra_1414	tetur02g09400	1	tetur02g09400	1
Tetra_1415	tetur02g08590, tetur08g04620	2	tetur02g08590, tetur08g04620	2
Tetra_1416	tetur02g90678, tetur02g10270, tetur02g90679	3	tetur02g10270	1
Tetra_524	tetur03g91584	1	no unique probes on array	-
Tetra_1418	tetur02g12830, tetur02g12840	2	tetur02g12830, tetur02g12840	2
Tetra_1419	tetur02g14390, tetur16g04149	2	tetur02g14390, tetur16g04149	2
Tetra_142	tetur03g01230, tetur03g06500, tetur11g06020	3	tetur03g01230, tetur03g06500, tetur11g06020	3
Tetra_1420	tetur03g01880, tetur03g01830, tetur24g00990	3	tetur24g00990	1
Tetra_521	tetur11g06470	1	no unique probes on array	-
Tetra_1422	tetur03g91564, tetur02g02640, tetur22g01360	3	tetur22g01360	1
Tetra_1423	tetur03g02190	1	tetur03g02190	1
Tetra_1424	tetur03g04920, tetur03g04900, tetur313g00010	3	tetur03g04900, tetur313g00010	2
Tetra_1425	tetur04g05670, tetur04g05680	2	tetur04g05670	1
Tetra_1426	tetur04g07400, tetur02g09930, tetur39g90807	3	tetur02g09930, tetur04g07400	2
Tetra_1427	tetur04g07760, tetur12g00980, tetur387g00020	3	tetur04g07760, tetur12g00980, tetur387g00020	3
Tetra_1428	tetur04g01490, tetur564g00010	2	tetur04g01490	1
Tetra_1429	tetur04g92284, tetur07g07390	2	tetur07g07390	1
Tetra_143	tetur03g91543, tetur03g05650, tetur03g05670, tetur03g05680, tetur03g05710	5	tetur03g05650, tetur03g05670, tetur03g05680	3
Tetra_50	tetur02g90725, tetur106g00030, tetur48g90016, tetur46g00130	4	no unique probes on array	-
Tetra_495	tetur15g91280, tetur15g91279, tetur15g91287, tetur15g91281	4	no unique probes on array	-
Tetra_1432	tetur04g06440, tetur77g00040, tetur04g06420	3	tetur04g06440, tetur77g00040	2
Tetra_1433	tetur06g91424, tetur24g01470	2	tetur24g01470	1
Tetra_1434	tetur06g02960, tetur30g01070, tetur30g01110	3	tetur06g02960, tetur30g01070, tetur30g01110	3
Tetra_1435	tetur07g00640	1	tetur07g00640	1
Tetra_489	tetur06g06953, tetur06g04380, tetur06g04590	3	no unique probes on array	-
Tetra_486	tetur04g92245, tetur02g90613, tetur09g04870, tetur14g93021	4	no unique probes on array	-
Tetra_1438	tetur08g03110, tetur08g03170	2	tetur08g03110	1
Tetra_1439	tetur08g01020	1	tetur08g01020	1
Tetra_1440	tetur08g01460, tetur15g91254	2	tetur08g01460	1
Tetra_1441	tetur08g03590, tetur27g91685	2	tetur08g03590	1
Tetra_480	tetur147g00010, tetur33g01250	2	no unique probes on array	-
Tetra_478	tetur15g01660, tetur15g01670	2	no unique probes on array	-
Tetra_1444	tetur10g00010, tetur10g00040	2	tetur10g00040	1
Tetra_1445	tetur10g05767, tetur28g01530	2	tetur28g01530	1
Tetra_1446	tetur11g02200, tetur14g03760	2	tetur11g02200, tetur14g03760	2
Tetra_1447	tetur122g00010, tetur20g00950	2	tetur20g00950	1
Tetra_476	tetur01g17024, tetur39g00821	2	no unique probes on array	-
Tetra_1449	tetur11g05260	1	tetur11g05260	1
Tetra_145	tetur03g03620, tetur03g10083, tetur11g01360, tetur11g06390, tetur11g06400	5	tetur03g03620, tetur11g06390, tetur11g06400	3
Tetra_1450	tetur12g02350, tetur12g91709	2	tetur12g02350	1
Tetra_1451	tetur13g00610, tetur13g00600, tetur13g00650	3	tetur13g00600, tetur13g00610, tetur13g00650	3
Tetra_1452	tetur61g00020, tetur04g07750	2	tetur04g07750, tetur61g00020	2
Tetra_1453	tetur13g01660	1	tetur13g01660	1
Tetra_461	tetur05g09307, tetur05g03830	2	no unique probes on array	-
Tetra_458	tetur23g00010, tetur40g00340	2	no unique probes on array	-
Tetra_1456	tetur13g92947, tetur14g03420	2	tetur14g03420	1
Tetra_1457	tetur14g04120, tetur14g04100, tetur29g01660	3	tetur14g04120, tetur29g01660	2
Tetra_1458	tetur14g03030, tetur14g03040	2	tetur14g03030, tetur14g03040	2
Tetra_1459	tetur15g03800	1	tetur15g03800	1
Tetra_146	tetur02g12800, tetur26g02610	2	tetur02g12800, tetur26g02610	2
Tetra_1460	tetur16g90588, tetur29g01680	2	tetur29g01680	1
Tetra_1461	tetur175g00020, tetur199g90170	2	tetur175g00020	1
Tetra_1462	tetur17g00220	1	tetur17g00220	1
Tetra_1463	tetur18g01420, tetur12g04620, tetur30g01190	3	tetur12g04620, tetur18g01420, tetur30g01190	3
Tetra_454	tetur07g08239, tetur193g00030	2	no unique probes on array	-
Tetra_1465	tetur23g01190	1	tetur23g01190	1
Tetra_447	tetur04g92280	1	no unique probes on array	-
Tetra_445	tetur05g00390, tetur05g02510	2	no unique probes on array	-
Tetra_1468	tetur24g02030	1	tetur24g02030	1
Tetra_1469	tetur26g00160, tetur26g91082	2	tetur26g00160	1
Tetra_147	tetur03g07990, tetur10g05768, tetur22g01480, tetur23g91458	4	tetur03g07990, tetur10g05768, tetur22g01480	3
Tetra_1470	tetur26g00210	1	tetur26g00210	1
Tetra_1471	tetur30g90538, tetur41g00030	2	tetur41g00030	1
Tetra_437	tetur07g91834	1	no unique probes on array	-
Tetra_1473	tetur32g00020, tetur44g00230	2	tetur32g00020	1
Tetra_1474	tetur32g02100	1	tetur32g02100	1
Tetra_1475	tetur30g00630, tetur30g00820	2	tetur30g00630, tetur30g00820	2
Tetra_1476	tetur35g01110, tetur35g01160	2	tetur35g01110	1
Tetra_1477	tetur36g00010, tetur41g00200	2	tetur41g00200	1
Tetra_1478	tetur39g00530	1	tetur39g00530	1
Tetra_1479	tetur80g00020, tetur03g91488, tetur03g04560	3	tetur03g04560, tetur80g00020	2
Tetra_148	tetur01g91159, tetur02g08390	2	tetur01g91159	1
Tetra_1489	tetur27g01230	1	tetur27g01230	1
Tetra_435	tetur02g14180	1	no unique probes on array	-
Tetra_1492	tetur38g00724	1	tetur38g00724	1
Tetra_15	tetur01g01060, tetur09g05460, tetur14g00970, tetur14g02520, tetur16g03861, tetur19g00270, tetur20g02450, tetur20g02850, tetur24g02490, tetur24g01360, tetur27g01000, tetur27g01010, tetur28g00810, tetur28g00820, tetur378g90227, tetur407g00010, tetur99g00020	17	tetur01g01060, tetur09g05460, tetur14g00970, tetur14g02520, tetur16g03861, tetur19g00270, tetur20g02450, tetur20g02850, tetur24g01360, tetur24g02490, tetur27g01000, tetur27g01010, tetur28g00810, tetur28g00820, tetur407g00010, tetur99g00020	16
Tetra_150	tetur01g02090, tetur02g06160	2	tetur01g02090, tetur02g06160	2
Tetra_1500	tetur19g92448	1	tetur19g92448	1
Tetra_151	tetur05g02560, tetur08g01710, tetur26g00050	3	tetur05g02560, tetur08g01710, tetur26g00050	3
Tetra_152	tetur02g08720, tetur02g08740, tetur02g08790, tetur02g08830, tetur412g00010	5	tetur02g08720, tetur02g08740, tetur02g08790, tetur02g08830, tetur412g00010	5
Tetra_153	tetur28g02450, tetur43g00270	2	tetur43g00270	1
Tetra_154	tetur05g04490, tetur05g04500, tetur05g04510, tetur05g04520	4	tetur05g04490, tetur05g04500, tetur05g04520	3
Tetra_155	tetur05g01440, tetur05g01480, tetur05g01550	3	tetur05g01440, tetur05g01480	2
Tetra_434	tetur07g07790, tetur34g00050	2	no unique probes on array	-
Tetra_432	tetur01g92360, tetur39g90798	2	no unique probes on array	-
Tetra_158	tetur03g91522, tetur178g00020	2	tetur178g00020	1
Tetra_1585	tetur19g03150	1	tetur19g03150	1
Tetra_159	tetur02g02800, tetur02g02810, tetur136g00030, tetur136g00040, tetur136g90379	5	tetur02g02800	1
Tetra_1592	tetur01g16190	1	tetur01g16190	1
Tetra_16	tetur01g01310, tetur01g05320, tetur01g92305, tetur01g92339, tetur02g05480, tetur03g07410, tetur04g92261, tetur05g01680, tetur07g00720, tetur09g03030, tetur11g02360, tetur12g00970, tetur13g01490, tetur17g03640, tetur17g92141, tetur24g01390, tetur284g00020, tetur39g00400, tetur52g00030, tetur92g00060	20	tetur01g01310, tetur01g05320, tetur02g05480, tetur03g07410, tetur05g01680, tetur07g00720, tetur09g03030, tetur11g02360, tetur13g01490, tetur17g03640, tetur24g01390, tetur284g00020, tetur39g00400, tetur52g00030, tetur92g00060	15
Tetra_160	tetur02g06130, tetur01g91172, tetur04g00360, tetur22g01370, tetur29g01250, tetur50g00060, tetur97g00030	7	tetur02g06130, tetur04g00360, tetur22g01370, tetur29g01250, tetur50g00060, tetur97g00030	6
Tetra_1600	tetur11g05780	1	tetur11g05780	1
Tetra_431	tetur07g02890, tetur07g02910	2	no unique probes on array	-
Tetra_1612	tetur06g00770	1	tetur06g00770	1
Tetra_162	tetur02g02500, tetur04g92227, tetur09g03590, tetur143g00010, tetur169g90157, tetur25g01510	6	tetur02g02500, tetur09g03590, tetur143g00010, tetur25g01510	4
Tetra_419	tetur01g91117, tetur01g91118	2	no unique probes on array	-
Tetra_164	tetur32g90860, tetur32g00940, tetur32g00950, tetur32g00960, tetur32g00980, tetur32g00990, tetur32g01020	7	tetur32g00940, tetur32g00950, tetur32g00960, tetur32g00980, tetur32g00990, tetur32g01020	6
Tetra_1649	tetur02g04970	1	tetur02g04970	1
Tetra_165	tetur02g13890, tetur02g90629, tetur02g13910, tetur02g13920	4	tetur02g13890, tetur02g13910, tetur02g90629	3
Tetra_166	tetur06g02020, tetur06g02030, tetur06g02040, tetur06g02050	4	tetur06g02020, tetur06g02030, tetur06g02040, tetur06g02050	4
Tetra_167	tetur01g13460, tetur13g04746	2	tetur01g13460	1
Tetra_168	tetur08g06700, tetur154g00010	2	tetur08g06700	1
Tetra_169	tetur01g00450, tetur02g01540	2	tetur02g01540	1
Tetra_17	tetur06g05120, tetur12g00810, tetur12g01660, tetur12g01670, tetur12g01680, tetur12g01690, tetur12g04893, tetur12g04903, tetur12g04010, tetur12g04020, tetur12g04090, tetur12g04661, tetur12g04703, tetur12g04743, tetur12g04753, tetur12g04763, tetur12g04773, tetur12g04783, tetur12g91755, tetur12g04793, tetur12g04803, tetur12g04823, tetur12g04833, tetur12g04843, tetur12g04853, tetur265g00001, tetur27g…	34	tetur06g05120, tetur12g00810, tetur12g01660, tetur12g01670, tetur12g01680, tetur12g01690, tetur12g04010, tetur12g04090, tetur12g04661, tetur27g01820, tetur34g00390, tetur34g00400, tetur34g00410, tetur35g00340	14
Tetra_1700	tetur18g00460	1	tetur18g00460	1
Tetra_173	tetur07g07700, tetur09g04840, tetur19g02880	3	tetur07g07700, tetur09g04840, tetur19g02880	3
Tetra_1736	tetur26g02230	1	tetur26g02230	1
Tetra_1740	tetur02g05050	1	tetur02g05050	1
Tetra_175	tetur03g01280, tetur08g07560	2	tetur03g01280, tetur08g07560	2
Tetra_176	tetur01g02810, tetur03g08480	2	tetur01g02810, tetur03g08480	2
Tetra_177	tetur01g11780, tetur26g00970	2	tetur01g11780, tetur26g00970	2
Tetra_411	tetur16g00290, tetur16g00300	2	no unique probes on array	-
Tetra_178	tetur17g00530, tetur17g00560	2	tetur17g00530, tetur17g00560	2
Tetra_1783	tetur02g12300	1	tetur02g12300	1
Tetra_179	tetur01g02950, tetur01g03300, tetur41g00340	3	tetur01g02950, tetur01g03300, tetur41g00340	3
Tetra_18	tetur02g02820, tetur02g02830, tetur02g02840, tetur02g02850, tetur02g02870, tetur02g02880, tetur02g02900, tetur02g02910, tetur02g02920, tetur02g02930, tetur02g02940, tetur02g02950, tetur02g02960, tetur02g03000, tetur02g92507, tetur136g00050, tetur429g90244, tetur02g92509, tetur53g00070, tetur57g00010, tetur57g00020, tetur57g00030, tetur57g00040, tetur57g00050, tetur57g00060, tetur57g00070, tetur57…	34	tetur02g02820, tetur02g02880, tetur02g02910, tetur02g02950, tetur02g02960, tetur02g03000, tetur53g00070, tetur57g00010, tetur57g00040, tetur57g00090, tetur57g00120, tetur57g00130	12
Tetra_180	tetur06g00600, tetur10g00430, tetur13g03520	3	tetur06g00600	1
Tetra_407	tetur11g00170	1	no unique probes on array	-
Tetra_1808	tetur01g03210	1	tetur01g03210	1
Tetra_404	tetur09g03130	1	no unique probes on array	-
Tetra_181	tetur434g00010, tetur251g00010, tetur45g00020, tetur54g00040, tetur54g00050	5	tetur251g00010, tetur434g00010, tetur45g00020, tetur54g00040, tetur54g00050	5
Tetra_403	tetur12g00080, tetur27g02540	2	no unique probes on array	-
Tetra_1811	tetur01g03750	1	tetur01g03750	1
Tetra_1812	tetur01g00680	1	tetur01g00680	1
Tetra_1813	tetur01g00690	1	tetur01g00690	1
Tetra_1814	tetur01g00920	1	tetur01g00920	1
Tetra_1815	tetur01g01120	1	tetur01g01120	1
Tetra_1816	tetur01g01170	1	tetur01g01170	1
Tetra_1817	tetur01g01280	1	tetur01g01280	1
Tetra_396	tetur01g04190, tetur15g91275	2	no unique probes on array	-
Tetra_1819	tetur01g01610	1	tetur01g01610	1
Tetra_182	tetur02g11570, tetur30g00610	2	tetur02g11570, tetur30g00610	2
Tetra_1824	tetur01g00150	1	tetur01g00150	1
Tetra_1825	tetur01g00310	1	tetur01g00310	1
Tetra_1826	tetur01g01760	1	tetur01g01760	1
Tetra_1827	tetur01g01770	1	tetur01g01770	1
Tetra_1828	tetur01g01980	1	tetur01g01980	1
Tetra_1829	tetur01g01990	1	tetur01g01990	1
Tetra_183	tetur01g03390, tetur04g90896, tetur12g01030	3	tetur01g03390	1
Tetra_1830	tetur01g02270	1	tetur01g02270	1
Tetra_1831	tetur01g02280	1	tetur01g02280	1
Tetra_1832	tetur01g02400	1	tetur01g02400	1
Tetra_1833	tetur01g02420	1	tetur01g02420	1
Tetra_1834	tetur01g02550	1	tetur01g02550	1
Tetra_1835	tetur01g05040	1	tetur01g05040	1
Tetra_1836	tetur01g05110	1	tetur01g05110	1
Tetra_393	tetur03g04370	1	no unique probes on array	-
Tetra_1838	tetur01g05970, tetur01g05940	2	tetur01g05940	1
Tetra_1839	tetur01g06020	1	tetur01g06020	1
Tetra_184	tetur05g03130, tetur07g04140, tetur28g02600	3	tetur05g03130, tetur07g04140, tetur28g02600	3
Tetra_1840	tetur01g06030	1	tetur01g06030	1
Tetra_1841	tetur01g06180	1	tetur01g06180	1
Tetra_1842	tetur01g06700	1	tetur01g06700	1
Tetra_1843	tetur01g06920	1	tetur01g06920	1
Tetra_1844	tetur01g07090	1	tetur01g07090	1
Tetra_1845	tetur01g04230	1	tetur01g04230	1
Tetra_1846	tetur01g04270	1	tetur01g04270	1
Tetra_1847	tetur01g04700	1	tetur01g04700	1
Tetra_1848	tetur01g04840	1	tetur01g04840	1
Tetra_1849	tetur01g04950	1	tetur01g04950	1
Tetra_185	tetur09g02450, tetur28g00240	2	tetur09g02450, tetur28g00240	2
Tetra_1850	tetur01g08640	1	tetur01g08640	1
Tetra_1851	tetur01g08900	1	tetur01g08900	1
Tetra_1852	tetur01g09030	1	tetur01g09030	1
Tetra_1853	tetur01g09040	1	tetur01g09040	1
Tetra_1854	tetur01g09110	1	tetur01g09110	1
Tetra_1855	tetur01g12120	1	tetur01g12120	1
Tetra_389	tetur11g06492	1	no unique probes on array	-
Tetra_1857	tetur01g12570	1	tetur01g12570	1
Tetra_1858	tetur01g10480	1	tetur01g10480	1
Tetra_1859	tetur01g10680	1	tetur01g10680	1
Tetra_186	tetur19g01230, tetur19g01260	2	tetur19g01230, tetur19g01260	2
Tetra_379	tetur13g04706, tetur13g03150	2	no unique probes on array	-
Tetra_1861	tetur01g13890	1	tetur01g13890	1
Tetra_1862	tetur01g13920	1	tetur01g13920	1
Tetra_1863	tetur01g14220	1	tetur01g14220	1
Tetra_1864	tetur01g14680	1	tetur01g14680	1
Tetra_1865	tetur01g14730	1	tetur01g14730	1
Tetra_1866	tetur01g13290	1	tetur01g13290	1
Tetra_37	tetur02g03900, tetur03g91588, tetur04g90897, tetur04g90898, tetur06g00380, tetur06g91341, tetur06g91345, tetur06g91368, tetur06g91397, tetur08g91671, tetur08g91672, tetur11g90921, tetur15g91277, tetur21g91204, tetur21g91205, tetur23g91450, tetur24g92182, tetur26g91081, tetur369g90223	19	no unique probes on array	-
Tetra_1868	tetur01g13440	1	tetur01g13440	1
Tetra_326	tetur05g92648	1	no unique probes on array	-
Tetra_187	tetur08g06540, tetur23g01450, tetur24g01290	3	tetur08g06540, tetur23g01450, tetur24g01290	3
Tetra_320	tetur06g91430, tetur12g91715	2	no unique probes on array	-
Tetra_32	tetur02g92490, tetur03g10247, tetur07g91825, tetur13g04916, tetur16g04209, tetur31g02062	6	no unique probes on array	-
Tetra_311	tetur03g91553, tetur37g91295	2	no unique probes on array	-
Tetra_310	tetur24g92188, tetur26g00840, tetur26g91086	3	no unique probes on array	-
Tetra_297	tetur04g00080, tetur04g00090	2	no unique probes on array	-
Tetra_285	tetur03g91554, tetur04g07100	2	no unique probes on array	-
Tetra_1876	tetur01g15070	1	tetur01g15070	1
Tetra_1877	tetur01g15270	1	tetur01g15270	1
Tetra_278	tetur01g92347	1	no unique probes on array	-
Tetra_1879	tetur01g15800	1	tetur01g15800	1
Tetra_273	tetur01g16140, tetur01g16150	2	no unique probes on array	-
Tetra_1880	tetur01g92353, tetur01g04690	2	tetur01g04690	1
Tetra_262	tetur01g92417, tetur01g92416, tetur06g91411, tetur06g91412, tetur11g90943, tetur19g92459	6	no unique probes on array	-
Tetra_260	tetur01g06340, tetur01g92374, tetur04g09150, tetur04g09270	4	no unique probes on array	-
Tetra_2543	tetur79g90109, tetur08g91660	2	no unique probes on array	-
Tetra_2541	tetur66g90069, tetur12g91754	2	no unique probes on array	-
Tetra_2537	tetur39g90801, tetur39g00410	2	no unique probes on array	-
Tetra_2536	tetur64g90072, tetur01g92331	2	no unique probes on array	-
Tetra_2535	tetur63g90345, tetur22g03043	2	no unique probes on array	-
Tetra_1888	tetur02g00070	1	tetur02g00070	1
Tetra_1889	tetur01g16507	1	tetur01g16507	1
Tetra_189	tetur41g00620, tetur41g00640	2	tetur41g00620, tetur41g00640	2
Tetra_1890	tetur01g16522	1	tetur01g16522	1
Tetra_2533	tetur460g90248	1	no unique probes on array	-
Tetra_1892	tetur02g01500	1	tetur02g01500	1
Tetra_1893	tetur02g01790	1	tetur02g01790	1
Tetra_1894	tetur02g02180	1	tetur02g02180	1
Tetra_1895	tetur02g03960	1	tetur02g03960	1
Tetra_2523	tetur46g90023	1	no unique probes on array	-
Tetra_2516	tetur36g91061	1	no unique probes on array	-
Tetra_1898	tetur02g04730	1	tetur02g04730	1
Tetra_1899	tetur02g00420	1	tetur02g00420	1
Tetra_19	tetur02g14280, tetur02g14420, tetur02g14470, tetur08g03060, tetur12g00580, tetur13g04230, tetur19g92445, tetur20g00010, tetur20g00020, tetur20g00030, tetur20g00040, tetur20g00050, tetur20g00090, tetur20g00100, tetur20g00540, tetur20g00550, tetur20g00560, tetur19g00950, tetur20g90779, tetur20g90780, tetur20g90781, tetur19g02210, tetur20g00670, tetur47g00120, tetur47g00170, tetur43g00560, tetur43g0…	37	tetur08g03060, tetur12g00580, tetur13g04230, tetur19g00950, tetur19g02210, tetur20g00010, tetur20g00020, tetur20g00030, tetur20g00050, tetur20g00540, tetur20g00550, tetur20g00560, tetur20g00670, tetur43g00560, tetur43g00570, tetur43g00580, tetur47g00120, tetur58g00010, tetur58g00050	19
Tetra_190	tetur14g03890, tetur14g04030, tetur14g93025, tetur14g93026, tetur14g03840	5	tetur14g04030	1
Tetra_1900	tetur02g00650	1	tetur02g00650	1
Tetra_1901	tetur02g00890	1	tetur02g00890	1
Tetra_1902	tetur02g00930	1	tetur02g00930	1
Tetra_1903	tetur02g00990	1	tetur02g00990	1
Tetra_2511	tetur39g00040	1	no unique probes on array	-
Tetra_1905	tetur02g01390	1	tetur02g01390	1
Tetra_1906	tetur02g04900	1	tetur02g04900	1
Tetra_1907	tetur02g04910	1	tetur02g04910	1
Tetra_1908	tetur02g04930	1	tetur02g04930	1
Tetra_1909	tetur02g04950	1	tetur02g04950	1
Tetra_191	tetur07g01810, tetur12g03720, tetur35g00430	3	tetur07g01810, tetur12g03720, tetur35g00430	3
Tetra_1910	tetur02g05110	1	tetur02g05110	1
Tetra_1911	tetur02g03270	1	tetur02g03270	1
Tetra_1912	tetur02g03720	1	tetur02g03720	1
Tetra_1913	tetur02g03730	1	tetur02g03730	1
Tetra_2510	tetur38g91441, tetur23g91443	2	no unique probes on array	-
Tetra_1915	tetur02g06030	1	tetur02g06030	1
Tetra_1916	tetur02g06390	1	tetur02g06390	1
Tetra_1917	tetur02g07670, tetur01g92406	2	tetur02g07670	1
Tetra_1918	tetur02g08060, tetur02g08020	2	tetur02g08020, tetur02g08060	2
Tetra_1919	tetur02g09410	1	tetur02g09410	1
Tetra_192	tetur03g00360, tetur03g00370, tetur03g00400, tetur03g91620, tetur03g91623, tetur08g07680	6	tetur08g07680	1
Tetra_1920	tetur02g09430	1	tetur02g09430	1
Tetra_2506	tetur36g00830	1	no unique probes on array	-
Tetra_1922	tetur02g09900	1	tetur02g09900	1
Tetra_1923	tetur02g10020	1	tetur02g10020	1
Tetra_1924	tetur02g10120	1	tetur02g10120	1
Tetra_1925	tetur02g09040	1	tetur02g09040	1
Tetra_1926	tetur02g09050	1	tetur02g09050	1
Tetra_1927	tetur02g09190	1	tetur02g09190	1
Tetra_1928	tetur02g09220	1	tetur02g09220	1
Tetra_1929	tetur02g09260	1	tetur02g09260	1
Tetra_193	tetur03g00690, tetur16g90562, tetur87g00020, tetur87g00030, tetur87g00040	5	tetur03g00690, tetur87g00020, tetur87g00030, tetur87g00040	4
Tetra_1930	tetur02g09280	1	tetur02g09280	1
Tetra_2505	tetur35g91787, tetur07g91849	2	no unique probes on array	-
Tetra_1932	tetur02g90705, tetur02g08800	2	tetur02g08800	1
Tetra_2504	tetur35g91784	1	no unique probes on array	-
Tetra_2503	tetur35g91782	1	no unique probes on array	-
Tetra_2502	tetur35g91773, tetur12g91766	2	no unique probes on array	-
Tetra_1936	tetur02g92485	1	tetur02g92485	1
Tetra_1937	tetur02g92522	1	tetur02g92522	1
Tetra_2500	tetur35g01646, tetur35g01390	2	no unique probes on array	-
Tetra_1939	tetur02g10980	1	tetur02g10980	1
Tetra_194	tetur03g00840, tetur03g00860, tetur03g00880, tetur03g00900, tetur03g91614, tetur03g91955	6	tetur03g00840, tetur03g00860, tetur03g00880, tetur03g00900	4
Tetra_1940	tetur02g11110	1	tetur02g11110	1
Tetra_25	tetur20g90775	1	no unique probes on array	-
Tetra_1942	tetur02g11750	1	tetur02g11750	1
Tetra_1943	tetur02g11780	1	tetur02g11780	1
Tetra_1944	tetur02g12170	1	tetur02g12170	1
Tetra_1945	tetur02g12720	1	tetur02g12720	1
Tetra_1946	tetur02g13930	1	tetur02g13930	1
Tetra_2495	tetur34g00260, tetur34g91806	2	no unique probes on array	-
Tetra_1948	tetur03g00250	1	tetur03g00250	1
Tetra_1949	tetur03g00650	1	tetur03g00650	1
Tetra_195	tetur05g05600, tetur03g07440, tetur05g05610, tetur05g05640, tetur08g06760, tetur08g06780, tetur184g00010	7	tetur03g07440, tetur05g05600, tetur05g05610, tetur05g05640, tetur08g06760, tetur08g06780, tetur184g00010	7
Tetra_1950	tetur03g01210	1	tetur03g01210	1
Tetra_1951	tetur03g01660	1	tetur03g01660	1
Tetra_1952	tetur03g03110	1	tetur03g03110	1
Tetra_1953	tetur03g03140	1	tetur03g03140	1
Tetra_1954	tetur03g03510	1	tetur03g03510	1
Tetra_1955	tetur03g03540	1	tetur03g03540	1
Tetra_1956	tetur03g04000	1	tetur03g04000	1
Tetra_2494	tetur33g90849, tetur08g91188	2	no unique probes on array	-
Tetra_1958	tetur03g04110	1	tetur03g04110	1
Tetra_1959	tetur03g10029	1	tetur03g10029	1
Tetra_196	tetur29g01390, tetur29g01400	2	tetur29g01390, tetur29g01400	2
Tetra_2493	tetur33g90848, tetur13g92963	2	no unique probes on array	-
Tetra_248	tetur30g02499, tetur30g02529	2	no unique probes on array	-
Tetra_2478	tetur31g90827, tetur33g90830	2	no unique probes on array	-
Tetra_2468	tetur33g00380, tetur33g00360	2	no unique probes on array	-
Tetra_1964	tetur03g91571, tetur01g13150	2	tetur01g13150	1
Tetra_2466	tetur31g02032	1	no unique probes on array	-
Tetra_1966	tetur03g91582, tetur02g06660	2	tetur02g06660	1
Tetra_2458	tetur31g00400	1	no unique probes on array	-
Tetra_2457	tetur315g90211, tetur03g91486	2	no unique probes on array	-
Tetra_1969	tetur03g05420	1	tetur03g05420	1
Tetra_197	tetur01g00950, tetur01g01000	2	tetur01g00950, tetur01g01000	2
Tetra_2450	tetur29g00540	1	no unique probes on array	-
Tetra_1971	tetur03g05700, tetur03g91544	2	tetur03g05700	1
Tetra_1972	tetur03g06320	1	tetur03g06320	1
Tetra_1973	tetur03g04770	1	tetur03g04770	1
Tetra_1974	tetur03g05140	1	tetur03g05140	1
Tetra_1975	tetur03g05150	1	tetur03g05150	1
Tetra_1976	tetur04g00160	1	tetur04g00160	1
Tetra_1977	tetur04g00220	1	tetur04g00220	1
Tetra_1978	tetur04g00300	1	tetur04g00300	1
Tetra_1979	tetur04g00310	1	tetur04g00310	1
Tetra_198	tetur13g04410, tetur14g02850, tetur37g00370	3	tetur13g04410, tetur14g02850, tetur37g00370	3
Tetra_1980	tetur03g08230	1	tetur03g08230	1
Tetra_1981	tetur03g08820	1	tetur03g08820	1
Tetra_1982	tetur03g09130	1	tetur03g09130	1
Tetra_1983	tetur03g09790	1	tetur03g09790	1
Tetra_245	tetur12g91749	1	no unique probes on array	-
Tetra_2449	tetur305g00010	1	no unique probes on array	-
Tetra_2448	tetur29g92559	1	no unique probes on array	-
Tetra_1987	tetur04g90892	1	tetur04g90892	1
Tetra_2447	tetur28g00500	1	no unique probes on array	-
Tetra_2445	tetur28g00230	1	no unique probes on array	-
Tetra_199	tetur16g02370, tetur26g02470	2	tetur16g02370, tetur26g02470	2
Tetra_1990	tetur04g02000	1	tetur04g02000	1
Tetra_1991	tetur04g02230, tetur04g90909	2	tetur04g02230	1
Tetra_1992	tetur04g02360	1	tetur04g02360	1
Tetra_1993	tetur04g02490	1	tetur04g02490	1
Tetra_1994	tetur04g02660	1	tetur04g02660	1
Tetra_1995	tetur04g05270	1	tetur04g05270	1
Tetra_2439	tetur278g00010, tetur03g00820	2	no unique probes on array	-
Tetra_1997	tetur04g04240	1	tetur04g04240	1
Tetra_2437	tetur27g01420, tetur245g90442	2	no unique probes on array	-
Tetra_1999	tetur04g04800	1	tetur04g04800	1
Tetra_2	tetur01g14820, tetur01g14830, tetur01g14840, tetur01g14870, tetur01g14880, tetur01g14900, tetur01g14950, tetur01g14970, tetur01g91162, tetur02g00190, tetur01g16614, tetur01g16694, tetur02g02230, tetur02g04180, tetur02g04200, tetur02g08930, tetur02g15287, tetur04g09504, tetur04g02560, tetur04g02570, tetur04g05470, tetur04g05500, tetur04g05530, tetur04g05590, tetur04g05610, tetur04g03360, tetur05g0…	153	tetur01g14820, tetur01g14830, tetur01g14840, tetur01g14870, tetur01g14880, tetur01g14900, tetur01g14950, tetur01g14970, tetur01g16614, tetur01g16694, tetur02g00190, tetur02g02230, tetur02g04180, tetur02g04200, tetur02g08930, tetur04g02560, tetur04g03360, tetur04g05470, tetur04g05500, tetur04g05530, tetur04g05590, tetur04g05610, tetur07g01770, tetur07g01820, tetur10g05340, tetur11g05240, tetur11g0…	82
Tetra_20	tetur04g07730, tetur06g02410, tetur07g06450, tetur184g00040, tetur188g00040, tetur21g01370, tetur23g00090, tetur23g00100, tetur23g00140, tetur30g02060	10	tetur04g07730, tetur21g01370, tetur23g00090, tetur23g00140, tetur30g02060	5
Tetra_200	tetur02g05250, tetur04g03910	2	tetur02g05250, tetur04g03910	2
Tetra_2000	tetur04g04940, tetur04g05800	2	tetur04g04940	1
Tetra_2001	tetur04g06490	1	tetur04g06490	1
Tetra_2002	tetur04g06640	1	tetur04g06640	1
Tetra_2003	tetur04g06870	1	tetur04g06870	1
Tetra_2004	tetur04g07110	1	tetur04g07110	1
Tetra_2005	tetur04g02930	1	tetur04g02930	1
Tetra_2006	tetur04g03450	1	tetur04g03450	1
Tetra_2435	tetur27g01070	1	no unique probes on array	-
Tetra_2008	tetur04g08520	1	tetur04g08520	1
Tetra_2009	tetur04g08750	1	tetur04g08750	1
Tetra_201	tetur01g03330	1	tetur01g03330	1
Tetra_2010	tetur04g08880	1	tetur04g08880	1
Tetra_2011	tetur04g08890	1	tetur04g08890	1
Tetra_2423	tetur26g02190	1	no unique probes on array	-
Tetra_2419	tetur25g92716	1	no unique probes on array	-
Tetra_2014	tetur04g09360	1	tetur04g09360	1
Tetra_2015	tetur04g07410, tetur02g09940	2	tetur04g07410	1
Tetra_2016	tetur04g07530	1	tetur04g07530	1
Tetra_2017	tetur04g07850	1	tetur04g07850	1
Tetra_2018	tetur04g07880	1	tetur04g07880	1
Tetra_2019	tetur04g07940	1	tetur04g07940	1
Tetra_202	tetur15g02170, tetur26g01970	2	tetur15g02170	1
Tetra_2020	tetur04g08010	1	tetur04g08010	1
Tetra_2021	tetur04g08290, tetur300g00010	2	tetur04g08290, tetur300g00010	2
Tetra_2022	tetur04g01610	1	tetur04g01610	1
Tetra_2023	tetur04g01760	1	tetur04g01760	1
Tetra_2024	tetur04g92780	1	tetur04g92780	1
Tetra_2025	tetur05g00200, tetur05g00160	2	tetur05g00160, tetur05g00200	2
Tetra_2418	tetur25g92714	1	no unique probes on array	-
Tetra_2027	tetur05g08880	1	tetur05g08880	1
Tetra_2028	tetur05g09405, tetur05g01800	2	tetur05g01800	1
Tetra_2417	tetur25g92709	1	no unique probes on array	-
Tetra_2413	tetur25g92708	1	no unique probes on array	-
Tetra_2408	tetur25g02092	1	no unique probes on array	-
Tetra_2404	tetur24g92192	1	no unique probes on array	-
Tetra_2032	tetur05g92623, tetur05g01190	2	tetur05g01190	1
Tetra_2403	tetur24g92190, tetur24g00880	2	no unique probes on array	-
Tetra_2402	tetur24g92180	1	no unique probes on array	-
Tetra_2396	tetur23g91469	1	no unique probes on array	-
Tetra_2395	tetur23g91451	1	no unique probes on array	-
Tetra_2384	tetur22g92583, tetur22g92582	2	no unique probes on array	-
Tetra_2038	tetur05g08200	1	tetur05g08200	1
Tetra_2039	tetur05g08270	1	tetur05g08270	1
Tetra_2040	tetur05g08320	1	tetur05g08320	1
Tetra_2041	tetur05g08650	1	tetur05g08650	1
Tetra_2042	tetur05g08770	1	tetur05g08770	1
Tetra_2043	tetur05g04940	1	tetur05g04940	1
Tetra_2044	tetur05g05120	1	tetur05g05120	1
Tetra_2045	tetur05g05410	1	tetur05g05410	1
Tetra_2046	tetur05g05430	1	tetur05g05430	1
Tetra_2382	tetur22g92573	1	no unique probes on array	-
Tetra_2048	tetur05g07140	1	tetur05g07140	1
Tetra_2049	tetur05g05870	1	tetur05g05870	1
Tetra_205	tetur10g05100, tetur11g04950	2	tetur10g05100, tetur11g04950	2
Tetra_2050	tetur05g06160	1	tetur05g06160	1
Tetra_2051	tetur05g02750	1	tetur05g02750	1
Tetra_2052	tetur05g02910	1	tetur05g02910	1
Tetra_2053	tetur05g03080	1	tetur05g03080	1
Tetra_2054	tetur05g03110	1	tetur05g03110	1
Tetra_2375	tetur21g91231	1	no unique probes on array	-
Tetra_2056	tetur06g00930	1	tetur06g00930	1
Tetra_2374	tetur21g91220, tetur21g01560	2	no unique probes on array	-
Tetra_2058	tetur06g01870	1	tetur06g01870	1
Tetra_2373	tetur21g91203	1	no unique probes on array	-
Tetra_206	tetur01g13650, tetur01g13860	2	tetur01g13650, tetur01g13860	2
Tetra_2060	tetur06g02330	1	tetur06g02330	1
Tetra_2061	tetur14g04140	1	tetur14g04140	1
Tetra_2062	tetur06g03150	1	tetur06g03150	1
Tetra_2063	tetur06g04200	1	tetur06g04200	1
Tetra_2064	tetur06g04460	1	tetur06g04460	1
Tetra_2065	tetur06g05030	1	tetur06g05030	1
Tetra_2066	tetur06g05130	1	tetur06g05130	1
Tetra_2067	tetur06g05230	1	tetur06g05230	1
Tetra_2068	tetur06g05290	1	tetur06g05290	1
Tetra_2069	tetur06g05310	1	tetur06g05310	1
Tetra_2070	tetur06g05380	1	tetur06g05380	1
Tetra_2071	tetur07g01280	1	tetur07g01280	1
Tetra_2072	tetur07g02120	1	tetur07g02120	1
Tetra_2073	tetur07g02130	1	tetur07g02130	1
Tetra_2074	tetur07g04750, tetur07g04690	2	tetur07g04690	1
Tetra_2369	tetur21g03327	1	no unique probes on array	-
Tetra_2368	tetur21g03310, tetur08g00010	2	no unique probes on array	-
Tetra_2077	tetur07g02840	1	tetur07g02840	1
Tetra_2078	tetur07g00320	1	tetur07g00320	1
Tetra_2364	tetur21g02660	1	no unique probes on array	-
Tetra_208	tetur01g00090, tetur15g03630	2	tetur01g00090, tetur15g03630	2
Tetra_2080	tetur07g00660	1	tetur07g00660	1
Tetra_2081	tetur07g00740	1	tetur07g00740	1
Tetra_2082	tetur07g08269	1	tetur07g08269	1
Tetra_2360	tetur20g01290	1	no unique probes on array	-
Tetra_236	tetur113g00010, tetur12g01590	2	no unique probes on array	-
Tetra_2085	tetur07g91847	1	tetur07g91847	1
Tetra_2086	tetur07g91855, tetur07g91854	2	tetur07g91854	1
Tetra_2087	tetur07g06680	1	tetur07g06680	1
Tetra_2353	tetur19g02780	1	no unique probes on array	-
Tetra_2089	tetur07g07420	1	tetur07g07420	1
Tetra_2090	tetur07g07540	1	tetur07g07540	1
Tetra_2349	tetur21g00120	1	no unique probes on array	-
Tetra_2348	tetur212g00010	1	no unique probes on array	-
Tetra_2347	tetur20g90763	1	no unique probes on array	-
Tetra_2346	tetur20g90755	1	no unique probes on array	-
Tetra_2095	tetur08g00600	1	tetur08g00600	1
Tetra_2096	tetur07g03740	1	tetur07g03740	1
Tetra_2097	tetur08g01180	1	tetur08g01180	1
Tetra_2345	tetur19g00990	1	no unique probes on array	-
Tetra_2099	tetur08g05360	1	tetur08g05360	1
Tetra_21	tetur01g02380, tetur04g00380, tetur04g03300, tetur02g12960, tetur07g91821, tetur08g06380, tetur09g04530, tetur11g02940, tetur123g00030, tetur126g00020, tetur16g00780, tetur16g00800, tetur20g02230, tetur21g01950, tetur22g92572, tetur22g02650, tetur298g00010, tetur29g00960, tetur340g00010, tetur39g00380, tetur37g00270, tetur422g00010, tetur43g00030, tetur383g00010, tetur550g00010	25	tetur01g02380, tetur02g12960, tetur04g00380, tetur04g03300, tetur08g06380, tetur11g02940, tetur126g00020, tetur16g00780, tetur16g00800, tetur20g02230, tetur21g01950, tetur22g02650, tetur298g00010, tetur29g00960, tetur340g00010, tetur37g00270, tetur383g00010, tetur422g00010, tetur43g00030, tetur550g00010	20
Tetra_210	tetur03g02950, tetur12g02030	2	tetur03g02950, tetur12g02030	2
Tetra_2100	tetur08g05410	1	tetur08g05410	1
Tetra_2101	tetur08g05510	1	tetur08g05510	1
Tetra_2102	tetur08g05570	1	tetur08g05570	1
Tetra_2103	tetur08g06000	1	tetur08g06000	1
Tetra_2343	tetur20g00520	1	no unique probes on array	-
Tetra_2105	tetur08g04710	1	tetur08g04710	1
Tetra_2106	tetur08g04910	1	tetur08g04910	1
Tetra_2340	tetur19g92464	1	no unique probes on array	-
Tetra_2108	tetur08g05250	1	tetur08g05250	1
Tetra_2329	tetur18g02570, tetur03g91482	2	no unique probes on array	-
Tetra_211	tetur07g07070, tetur17g01760	2	tetur07g07070, tetur17g01760	2
Tetra_2328	tetur18g02320	1	no unique probes on array	-
Tetra_2321	tetur18g92104	1	no unique probes on array	-
Tetra_2112	tetur08g91669, tetur08g03190	2	tetur08g03190	1
Tetra_2113	tetur08g91670, tetur01g05150	2	tetur01g05150	1
Tetra_2314	tetur18g00880	1	no unique probes on array	-
Tetra_2115	tetur09g00170, tetur09g00150	2	tetur09g00150	1
Tetra_2304	tetur17g01280	1	no unique probes on array	-
Tetra_2117	tetur08g07190	1	tetur08g07190	1
Tetra_230	tetur02g92515	1	no unique probes on array	-
Tetra_2296	tetur17g92129	1	no unique probes on array	-
Tetra_212	tetur09g02470, tetur09g02490, tetur09g07530	3	tetur09g02470, tetur09g02490	2
Tetra_2120	tetur08g08369	1	tetur08g08369	1
Tetra_2295	tetur17g92120	1	no unique probes on array	-
Tetra_2122	tetur09g04740	1	tetur09g04740	1
Tetra_2294	tetur17g03520	1	no unique probes on array	-
Tetra_2124	tetur09g04900	1	tetur09g04900	1
Tetra_2125	tetur09g04910	1	tetur09g04910	1
Tetra_2126	tetur09g04960	1	tetur09g04960	1
Tetra_2127	tetur09g04980	1	tetur09g04980	1
Tetra_2128	tetur09g05020	1	tetur09g05020	1
Tetra_2129	tetur09g05040	1	tetur09g05040	1
Tetra_2130	tetur09g05070	1	tetur09g05070	1
Tetra_2131	tetur09g05090	1	tetur09g05090	1
Tetra_2132	tetur09g02910	1	tetur09g02910	1
Tetra_2133	tetur09g03100	1	tetur09g03100	1
Tetra_2134	tetur09g03190	1	tetur09g03190	1
Tetra_2288	tetur16g01070	1	no unique probes on array	-
Tetra_2136	tetur09g03990	1	tetur09g03990	1
Tetra_2137	tetur09g02680, tetur09g02770	2	tetur09g02680, tetur09g02770	2
Tetra_2138	tetur09g02830	1	tetur09g02830	1
Tetra_2139	tetur09g00900, tetur03g10103	2	tetur03g10103, tetur09g00900	2
Tetra_214	tetur01g14550, tetur15g01020	2	tetur01g14550	1
Tetra_2140	tetur09g01280	1	tetur09g01280	1
Tetra_2141	tetur09g01590	1	tetur09g01590	1
Tetra_2283	tetur16g02070	1	no unique probes on array	-
Tetra_2143	tetur09g01800	1	tetur09g01800	1
Tetra_2144	tetur09g92864, tetur09g04630	2	tetur09g04630, tetur09g92864	2
Tetra_2281	tetur16g90594	1	no unique probes on array	-
Tetra_2146	tetur09g05890	1	tetur09g05890	1
Tetra_2147	tetur09g06090	1	tetur09g06090	1
Tetra_2148	tetur09g06110	1	tetur09g06110	1
Tetra_2149	tetur09g06200, tetur09g06190	2	tetur09g06190, tetur09g06200	2
Tetra_215	tetur08g07810, tetur08g07830	2	tetur08g07810, tetur08g07830	2
Tetra_2150	tetur10g00090	1	tetur10g00090	1
Tetra_2151	tetur10g00100	1	tetur10g00100	1
Tetra_2280	tetur16g90591	1	no unique probes on array	-
Tetra_2153	tetur10g00480	1	tetur10g00480	1
Tetra_2154	tetur10g00660	1	tetur10g00660	1
Tetra_2155	tetur10g00870	1	tetur10g00870	1
Tetra_2156	tetur10g01390	1	tetur10g01390	1
Tetra_2157	tetur10g01560	1	tetur10g01560	1
Tetra_2158	tetur10g01630	1	tetur10g01630	1
Tetra_2159	tetur10g01840	1	tetur10g01840	1
Tetra_216	tetur11g05280, tetur12g00890	2	tetur11g05280, tetur12g00890	2
Tetra_2160	tetur10g01920	1	tetur10g01920	1
Tetra_2161	tetur10g02180	1	tetur10g02180	1
Tetra_2162	tetur10g02290	1	tetur10g02290	1
Tetra_2163	tetur10g02390	1	tetur10g02390	1
Tetra_2164	tetur10g02480	1	tetur10g02480	1
Tetra_2165	tetur10g02570	1	tetur10g02570	1
Tetra_2166	tetur10g02760	1	tetur10g02760	1
Tetra_2167	tetur09g06540	1	tetur09g06540	1
Tetra_2168	tetur09g06729	1	tetur09g06729	1
Tetra_2169	tetur10g03190	1	tetur10g03190	1
Tetra_217	tetur01g08730, tetur05g03010	2	tetur01g08730, tetur05g03010	2
Tetra_2170	tetur10g03590	1	tetur10g03590	1
Tetra_2171	tetur10g05470	1	tetur10g05470	1
Tetra_2172	tetur10g05650, tetur07g91832	2	tetur10g05650	1
Tetra_2279	tetur16g90569, tetur16g90568	2	no unique probes on array	-
Tetra_2278	tetur16g90561	1	no unique probes on array	-
Tetra_2175	tetur10g92068, tetur10g05490	2	tetur10g05490	1
Tetra_2176	tetur110g00040, tetur04g00440	2	tetur04g00440, tetur110g00040	2
Tetra_2177	tetur11g00050, tetur08g00900	2	tetur08g00900	1
Tetra_2178	tetur10g04440	1	tetur10g04440	1
Tetra_2179	tetur10g04630	1	tetur10g04630	1
Tetra_218	tetur05g01250, tetur15g01490	2	tetur05g01250, tetur15g01490	2
Tetra_2180	tetur10g04670	1	tetur10g04670	1
Tetra_2181	tetur10g05250	1	tetur10g05250	1
Tetra_2182	tetur11g02470	1	tetur11g02470	1
Tetra_2183	tetur11g02680	1	tetur11g02680	1
Tetra_2184	tetur11g01730	1	tetur11g01730	1
Tetra_2277	tetur16g90559	1	no unique probes on array	-
Tetra_2275	tetur16g00480	1	no unique probes on array	-
Tetra_2187	tetur12g00220	1	tetur12g00220	1
Tetra_2188	tetur11g03330	1	tetur11g03330	1
Tetra_2189	tetur11g03870	1	tetur11g03870	1
Tetra_219	tetur07g00370, tetur19g02360	2	tetur07g00370, tetur19g02360	2
Tetra_2190	tetur11g03940	1	tetur11g03940	1
Tetra_2191	tetur11g00280	1	tetur11g00280	1
Tetra_2192	tetur11g05070	1	tetur11g05070	1
Tetra_2193	tetur12g00470	1	tetur12g00470	1
Tetra_2194	tetur12g01050	1	tetur12g01050	1
Tetra_2195	tetur12g01110	1	tetur12g01110	1
Tetra_2196	tetur12g01240	1	tetur12g01240	1
Tetra_2274	tetur15g91285, tetur15g91282	2	no unique probes on array	-
Tetra_2268	tetur15g03320	1	no unique probes on array	-
Tetra_2199	tetur12g01340	1	tetur12g01340	1
Tetra_22	tetur02g03490, tetur02g12320, tetur06g03010, tetur06g03050, tetur11g05440, tetur11g05720, tetur11g05730, tetur11g05740, tetur15g01400, tetur15g01410, tetur15g91258, tetur15g91259, tetur22g02110, tetur22g02120, tetur22g02130, tetur22g02150, tetur22g02170, tetur22g02180, tetur22g02200, tetur22g02530, tetur46g00010	21	tetur02g03490, tetur02g12320, tetur11g05440, tetur11g05720, tetur11g05730, tetur15g01400, tetur15g01410, tetur22g02110, tetur22g02120, tetur22g02130, tetur22g02150, tetur22g02170, tetur22g02180, tetur22g02200, tetur22g02530	15
Tetra_220	tetur05g92629, tetur07g05450	2	tetur07g05450	1
Tetra_2200	tetur11g05630	1	tetur11g05630	1
Tetra_2201	tetur11g05660	1	tetur11g05660	1
Tetra_2202	tetur11g06270	1	tetur11g06270	1
Tetra_2203	tetur12g01610, tetur01g01550	2	tetur01g01550, tetur12g01610	2
Tetra_2204	tetur12g01650	1	tetur12g01650	1
Tetra_2205	tetur12g01770	1	tetur12g01770	1
Tetra_2206	tetur12g01900	1	tetur12g01900	1
Tetra_2207	tetur12g01920	1	tetur12g01920	1
Tetra_2208	tetur12g02160	1	tetur12g02160	1
Tetra_2209	tetur12g02520	1	tetur12g02520	1
Tetra_226	tetur02g09560, tetur05g00780	2	no unique probes on array	-
Tetra_2256	tetur14g00770, tetur14g04179	2	no unique probes on array	-
Tetra_2211	tetur138g00010, tetur38g00480	2	tetur138g00010, tetur38g00480	2
Tetra_2212	tetur12g02700	1	tetur12g02700	1
Tetra_2213	tetur12g02840, tetur12g02560	2	tetur12g02560, tetur12g02840	2
Tetra_2214	tetur12g02920	1	tetur12g02920	1
Tetra_2215	tetur12g04480	1	tetur12g04480	1
Tetra_2251	tetur157g00050, tetur12g02740	2	no unique probes on array	-
Tetra_2217	tetur13g00710	1	tetur13g00710	1
Tetra_2218	tetur13g00720	1	tetur13g00720	1
Tetra_2250	tetur14g93020	1	no unique probes on array	-
Tetra_222	tetur04g00110, tetur32g01760	2	tetur04g00110, tetur32g01760	2
Tetra_2220	tetur13g01580	1	tetur13g01580	1
Tetra_2221	tetur13g01610	1	tetur13g01610	1
Tetra_2222	tetur13g01850	1	tetur13g01850	1
Tetra_2223	tetur13g02140	1	tetur13g02140	1
Tetra_2224	tetur13g02280	1	tetur13g02280	1
Tetra_2249	tetur14g92995	1	no unique probes on array	-
Tetra_2241	tetur13g03650	1	no unique probes on array	-
Tetra_2238	tetur13g03560	1	no unique probes on array	-
Tetra_2228	tetur14g00110, tetur14g00080	2	tetur14g00080, tetur14g00110	2
Tetra_2229	tetur14g00230	1	tetur14g00230	1
Tetra_223	tetur02g05850, tetur20g02270	2	tetur02g05850, tetur20g02270	2
Tetra_2232	tetur13g03960	1	no unique probes on array	-
Tetra_2231	tetur14g00580	1	tetur14g00580	1
Tetra_2230	tetur14g00340	1	no unique probes on array	-
Tetra_2233	tetur13g04310	1	tetur13g04310	1
Tetra_2234	tetur13g02800	1	tetur13g02800	1
Tetra_2235	tetur13g03000	1	tetur13g03000	1
Tetra_2236	tetur13g03130	1	tetur13g03130	1
Tetra_2237	tetur13g03320, tetur13g03310	2	tetur13g03310, tetur13g03320	2
Tetra_2227	tetur13g92984, tetur03g91567	2	no unique probes on array	-
Tetra_2239	tetur13g03630	1	tetur13g03630	1
Tetra_224	tetur02g00570, tetur27g01840	2	tetur02g00570, tetur27g01840	2
Tetra_2240	tetur13g03640	1	tetur13g03640	1
Tetra_2226	tetur13g92959	1	no unique probes on array	-
Tetra_2242	tetur13g03680	1	tetur13g03680	1
Tetra_2243	tetur13g03830	1	tetur13g03830	1
Tetra_2244	tetur14g03870	1	tetur14g03870	1
Tetra_2245	tetur14g04110	1	tetur14g04110	1
Tetra_2246	tetur14g04130	1	tetur14g04130	1
Tetra_2247	tetur14g04150	1	tetur14g04150	1
Tetra_2248	tetur14g92990, tetur03g91503	2	tetur14g92990	1
Tetra_2225	tetur13g02340	1	no unique probes on array	-
Tetra_225	tetur40g00290, tetur40g00320	2	tetur40g00290, tetur40g00320	2
Tetra_2219	tetur13g01520	1	no unique probes on array	-
Tetra_2216	tetur12g04630	1	no unique probes on array	-
Tetra_2252	tetur15g00060	1	tetur15g00060	1
Tetra_2253	tetur15g00100	1	tetur15g00100	1
Tetra_2254	tetur14g00720	1	tetur14g00720	1
Tetra_2255	tetur14g00750	1	tetur14g00750	1
Tetra_2210	tetur12g91763	1	no unique probes on array	-
Tetra_2257	tetur14g01050	1	tetur14g01050	1
Tetra_2258	tetur14g03220	1	tetur14g03220	1
Tetra_2259	tetur14g03340	1	tetur14g03340	1
Tetra_221	tetur33g00550, tetur33g00370, tetur33g90844	3	no unique probes on array	-
Tetra_2260	tetur14g03500	1	tetur14g03500	1
Tetra_2261	tetur14g02110	1	tetur14g02110	1
Tetra_2262	tetur14g02120	1	tetur14g02120	1
Tetra_2263	tetur14g02420	1	tetur14g02420	1
Tetra_2264	tetur15g01610	1	tetur15g01610	1
Tetra_2265	tetur15g01790	1	tetur15g01790	1
Tetra_2266	tetur15g02820	1	tetur15g02820	1
Tetra_2267	tetur15g03230	1	tetur15g03230	1
Tetra_2198	tetur12g01330	1	no unique probes on array	-
Tetra_2269	tetur15g03830	1	tetur15g03830	1
Tetra_227	tetur03g01460, tetur06g04430, tetur06g04510	3	tetur06g04510	1
Tetra_2270	tetur15g00470	1	tetur15g00470	1
Tetra_2271	tetur15g00480	1	tetur15g00480	1
Tetra_2272	tetur15g00540	1	tetur15g00540	1
Tetra_2273	tetur15g00630	1	tetur15g00630	1
Tetra_2197	tetur12g01290	1	no unique probes on array	-
Tetra_2186	tetur11g90939, tetur11g90937	2	no unique probes on array	-
Tetra_2276	tetur16g00520	1	tetur16g00520	1
Tetra_2185	tetur11g01920	1	no unique probes on array	-
Tetra_2174	tetur10g92064	1	no unique probes on array	-
Tetra_2173	tetur10g92026	1	no unique probes on array	-
Tetra_228	tetur17g03490, tetur17g03560	2	tetur17g03490, tetur17g03560	2
Tetra_2152	tetur10g00240	1	no unique probes on array	-
Tetra_2145	tetur09g92900	1	no unique probes on array	-
Tetra_2282	tetur17g00100, tetur01g91318	2	tetur17g00100	1
Tetra_2142	tetur09g01690	1	no unique probes on array	-
Tetra_2284	tetur16g02210	1	tetur16g02210	1
Tetra_2285	tetur16g02310, tetur12g91716	2	tetur16g02310	1
Tetra_2286	tetur16g02460	1	tetur16g02460	1
Tetra_2287	tetur16g02490, tetur14g93004	2	tetur16g02490	1
Tetra_2135	tetur09g03240	1	no unique probes on array	-
Tetra_2289	tetur16g01370	1	tetur16g01370	1
Tetra_229	tetur02g07090, tetur02g09630	2	tetur02g07090, tetur02g09630	2
Tetra_2290	tetur16g01420	1	tetur16g01420	1
Tetra_2291	tetur17g02750	1	tetur17g02750	1
Tetra_2292	tetur17g02780	1	tetur17g02780	1
Tetra_2293	tetur17g03200	1	tetur17g03200	1
Tetra_2123	tetur09g04860	1	no unique probes on array	-
Tetra_2121	tetur08g91630	1	no unique probes on array	-
Tetra_2119	tetur08g07570	1	no unique probes on array	-
Tetra_2297	tetur17g92138	1	tetur17g92138	1
Tetra_2298	tetur17g92156	1	tetur17g92156	1
Tetra_2299	tetur181g00010, tetur14g92993	2	tetur181g00010	1
Tetra_23	tetur01g06390, tetur02g15605, tetur03g02490, tetur04g04980, tetur07g03230, tetur07g06380, tetur13g00830, tetur13g02750, tetur13g02760, tetur15g03300, tetur23g01270	11	tetur01g06390, tetur03g02490, tetur04g04980, tetur07g06380, tetur13g00830, tetur13g02750, tetur13g02760, tetur15g03300, tetur23g01270	9
Tetra_2118	tetur08g07350, tetur08g91959	2	no unique probes on array	-
Tetra_2300	tetur16g02830	1	tetur16g02830	1
Tetra_2301	tetur17g00620	1	tetur17g00620	1
Tetra_2302	tetur17g01160	1	tetur17g01160	1
Tetra_2303	tetur17g01200	1	tetur17g01200	1
Tetra_2116	tetur08g07110	1	no unique probes on array	-
Tetra_2305	tetur17g01390	1	tetur17g01390	1
Tetra_2306	tetur17g01990	1	tetur17g01990	1
Tetra_2307	tetur17g02230	1	tetur17g02230	1
Tetra_2308	tetur17g02290, tetur17g92135	2	tetur17g02290	1
Tetra_2309	tetur17g02630	1	tetur17g02630	1
Tetra_231	tetur07g02720, tetur28g01560	2	tetur07g02720, tetur28g01560	2
Tetra_2310	tetur18g00320	1	tetur18g00320	1
Tetra_2311	tetur18g00380	1	tetur18g00380	1
Tetra_2312	tetur18g00480	1	tetur18g00480	1
Tetra_2313	tetur18g00560	1	tetur18g00560	1
Tetra_2114	tetur09g00060	1	no unique probes on array	-
Tetra_2315	tetur18g00930	1	tetur18g00930	1
Tetra_2316	tetur18g01020	1	tetur18g01020	1
Tetra_2317	tetur18g03440	1	tetur18g03440	1
Tetra_2318	tetur18g03500, tetur04g07890	2	tetur04g07890, tetur18g03500	2
Tetra_2319	tetur18g03711, tetur16g03896	2	tetur16g03896	1
Tetra_232	tetur08g04210, tetur13g03220	2	tetur08g04210, tetur13g03220	2
Tetra_2320	tetur18g92103	1	tetur18g92103	1
Tetra_2111	tetur08g91649	1	no unique probes on array	-
Tetra_2322	tetur18g01320	1	tetur18g01320	1
Tetra_2323	tetur18g01590	1	tetur18g01590	1
Tetra_2324	tetur18g01670	1	tetur18g01670	1
Tetra_2325	tetur18g01820	1	tetur18g01820	1
Tetra_2326	tetur18g01870	1	tetur18g01870	1
Tetra_2327	tetur18g02030	1	tetur18g02030	1
Tetra_2110	tetur08g91640	1	no unique probes on array	-
Tetra_2109	tetur08g91637	1	no unique probes on array	-
Tetra_233	tetur04g06180, tetur04g06340, tetur04g06370, tetur77g00060	4	tetur04g06370, tetur77g00060	2
Tetra_2330	tetur18g03050	1	tetur18g03050	1
Tetra_2331	tetur19g01100	1	tetur19g01100	1
Tetra_2332	tetur19g01350	1	tetur19g01350	1
Tetra_2333	tetur19g01410	1	tetur19g01410	1
Tetra_2334	tetur19g01450	1	tetur19g01450	1
Tetra_2335	tetur19g01500	1	tetur19g01500	1
Tetra_2336	tetur19g01920	1	tetur19g01920	1
Tetra_2337	tetur19g02120	1	tetur19g02120	1
Tetra_2338	tetur19g03371	1	tetur19g03371	1
Tetra_2339	tetur19g92450, tetur04g00170	2	tetur04g00170	1
Tetra_2107	tetur08g05150	1	no unique probes on array	-
Tetra_2341	tetur209g00010, tetur05g92634	2	tetur209g00010	1
Tetra_2342	tetur20g00180	1	tetur20g00180	1
Tetra_2104	tetur08g04480	1	no unique probes on array	-
Tetra_2344	tetur19g00410	1	tetur19g00410	1
Tetra_2098	tetur08g04180	1	no unique probes on array	-
Tetra_2094	tetur08g00590	1	no unique probes on array	-
Tetra_2093	tetur08g00060	1	no unique probes on array	-
Tetra_2092	tetur07g91897	1	no unique probes on array	-
Tetra_2091	tetur07g91896	1	no unique probes on array	-
Tetra_235	tetur05g02020, tetur10g92049	2	tetur05g02020	1
Tetra_2350	tetur20g02660	1	tetur20g02660	1
Tetra_2351	tetur19g02380	1	tetur19g02380	1
Tetra_2352	tetur19g02580	1	tetur19g02580	1
Tetra_2088	tetur07g07040	1	no unique probes on array	-
Tetra_2354	tetur19g03180	1	tetur19g03180	1
Tetra_2355	tetur20g00690, tetur20g90772	2	tetur20g00690	1
Tetra_2356	tetur20g00960	1	tetur20g00960	1
Tetra_2357	tetur20g00970	1	tetur20g00970	1
Tetra_2358	tetur20g01030	1	tetur20g01030	1
Tetra_2359	tetur20g01260	1	tetur20g01260	1
Tetra_2084	tetur07g91823, tetur07g91819	2	no unique probes on array	-
Tetra_2083	tetur07g91816	1	no unique probes on array	-
Tetra_2361	tetur21g00460	1	tetur21g00460	1
Tetra_2362	tetur21g00990	1	tetur21g00990	1
Tetra_2363	tetur21g02350	1	tetur21g02350	1
Tetra_2079	tetur07g00360	1	no unique probes on array	-
Tetra_2365	tetur21g02900	1	tetur21g02900	1
Tetra_2366	tetur21g02910	1	tetur21g02910	1
Tetra_2367	tetur21g03300, tetur04g07740	2	tetur04g07740, tetur21g03300	2
Tetra_2076	tetur07g02480	1	no unique probes on array	-
Tetra_2075	tetur07g04800	1	no unique probes on array	-
Tetra_237	tetur03g91602, tetur05g09210	2	tetur05g09210	1
Tetra_2370	tetur21g01890	1	tetur21g01890	1
Tetra_2371	tetur21g01920	1	tetur21g01920	1
Tetra_2372	tetur21g02070	1	tetur21g02070	1
Tetra_2059	tetur06g01940	1	no unique probes on array	-
Tetra_2057	tetur06g91367	1	no unique probes on array	-
Tetra_2055	tetur05g92656	1	no unique probes on array	-
Tetra_2376	tetur22g00560	1	tetur22g00560	1
Tetra_2377	tetur22g01390	1	tetur22g01390	1
Tetra_2378	tetur22g01400	1	tetur22g01400	1
Tetra_2379	tetur22g01410	1	tetur22g01410	1
Tetra_238	tetur01g00610, tetur02g03940, tetur366g00010	3	tetur01g00610, tetur02g03940, tetur366g00010	3
Tetra_2380	tetur22g01820	1	tetur22g01820	1
Tetra_2381	tetur22g01880	1	tetur22g01880	1
Tetra_2047	tetur05g07020	1	no unique probes on array	-
Tetra_2383	tetur22g92580	1	tetur22g92580	1
Tetra_2037	tetur05g07980	1	no unique probes on array	-
Tetra_2385	tetur23g00480, tetur23g00470	2	tetur23g00470, tetur23g00480	2
Tetra_2386	tetur23g00560	1	tetur23g00560	1
Tetra_2387	tetur23g01100	1	tetur23g01100	1
Tetra_2388	tetur23g01610	1	tetur23g01610	1
Tetra_2389	tetur23g01720	1	tetur23g01720	1
Tetra_2390	tetur22g02370	1	tetur22g02370	1
Tetra_2391	tetur22g02400	1	tetur22g02400	1
Tetra_2392	tetur22g02420	1	tetur22g02420	1
Tetra_2393	tetur22g02880	1	tetur22g02880	1
Tetra_2394	tetur23g02000	1	tetur23g02000	1
Tetra_2036	tetur05g07940	1	no unique probes on array	-
Tetra_2035	tetur05g03420	1	no unique probes on array	-
Tetra_2397	tetur24g01050	1	tetur24g01050	1
Tetra_2398	tetur24g01070	1	tetur24g01070	1
Tetra_2399	tetur24g02230	1	tetur24g02230	1
Tetra_24	tetur02g11310, tetur03g09770, tetur05g01720, tetur05g01730, tetur06g03420, tetur11g05010, tetur11g05020, tetur11g05420, tetur11g05450, tetur15g01970, tetur15g01980, tetur06g03380, tetur17g03460, tetur17g00740, tetur20g00700, tetur20g00710, tetur20g00720, tetur20g00740, tetur20g00750, tetur318g00010, tetur46g00020	21	tetur02g11310, tetur05g01720, tetur05g01730, tetur06g03380, tetur06g03420, tetur11g05010, tetur15g01970, tetur15g01980, tetur17g00740, tetur17g03460, tetur20g00700, tetur20g00710, tetur20g00720, tetur20g00740, tetur20g00750	15
Tetra_240	tetur01g09840, tetur01g09850, tetur01g09870	3	tetur01g09870	1
Tetra_2400	tetur24g02410	1	tetur24g02410	1
Tetra_2401	tetur24g02470	1	tetur24g02470	1
Tetra_2034	tetur05g03390	1	no unique probes on array	-
Tetra_2033	tetur05g92632	1	no unique probes on array	-
Tetra_2031	tetur05g92607	1	no unique probes on array	-
Tetra_2405	tetur24g02040	1	tetur24g02040	1
Tetra_2406	tetur24g02050	1	tetur24g02050	1
Tetra_2407	tetur25g01840	1	tetur25g01840	1
Tetra_2030	tetur05g92602, tetur05g00190	2	no unique probes on array	-
Tetra_2409	tetur25g00190	1	tetur25g00190	1
Tetra_241	tetur02g10740, tetur23g02020	2	tetur02g10740, tetur23g02020	2
Tetra_2410	tetur25g00270	1	tetur25g00270	1
Tetra_2411	tetur25g00630	1	tetur25g00630	1
Tetra_2412	tetur25g00640	1	tetur25g00640	1
Tetra_203	tetur12g91750	1	no unique probes on array	-
Tetra_2414	tetur25g00930	1	tetur25g00930	1
Tetra_2415	tetur25g00980	1	tetur25g00980	1
Tetra_2416	tetur25g01040	1	tetur25g01040	1
Tetra_2029	tetur05g92596	1	no unique probes on array	-
Tetra_2026	tetur05g00480	1	no unique probes on array	-
Tetra_2013	tetur04g09290	1	no unique probes on array	-
Tetra_242	tetur16g01140, tetur16g01160, tetur16g01170, tetur16g01180	4	tetur16g01140, tetur16g01160, tetur16g01170, tetur16g01180	4
Tetra_2420	tetur26g00120	1	tetur26g00120	1
Tetra_2421	tetur26g00580, tetur26g00520	2	tetur26g00520, tetur26g00580	2
Tetra_2422	tetur26g01820	1	tetur26g01820	1
Tetra_2012	tetur04g09230, tetur04g09160	2	no unique probes on array	-
Tetra_2424	tetur26g02220	1	tetur26g02220	1
Tetra_2425	tetur26g02570	1	tetur26g02570	1
Tetra_2426	tetur26g01190	1	tetur26g01190	1
Tetra_2427	tetur26g01590	1	tetur26g01590	1
Tetra_2428	tetur26g01680	1	tetur26g01680	1
Tetra_2429	tetur28g02240	1	tetur28g02240	1
Tetra_243	tetur05g07740, tetur09g05300, tetur183g00020	3	tetur05g07740, tetur09g05300	2
Tetra_2430	tetur28g02290	1	tetur28g02290	1
Tetra_2431	tetur28g02619, tetur08g91657	2	tetur28g02619	1
Tetra_2432	tetur29g00100	1	tetur29g00100	1
Tetra_2433	tetur29g00370	1	tetur29g00370	1
Tetra_2434	tetur27g00740	1	tetur27g00740	1
Tetra_2007	tetur04g03750	1	no unique probes on array	-
Tetra_2436	tetur27g01400	1	tetur27g01400	1
Tetra_1998	tetur04g04730	1	no unique probes on array	-
Tetra_2438	tetur271g00040	1	tetur271g00040	1
Tetra_1996	tetur04g05730, tetur04g09505	2	no unique probes on array	-
Tetra_244	tetur25g92702, tetur25g00080, tetur25g00100	3	tetur25g00080, tetur25g00100	2
Tetra_2440	tetur27g00080	1	tetur27g00080	1
Tetra_2441	tetur27g00180	1	tetur27g00180	1
Tetra_2442	tetur27g01950, tetur01g14160	2	tetur01g14160, tetur27g01950	2
Tetra_2443	tetur27g02400	1	tetur27g02400	1
Tetra_2444	tetur27g91687	1	tetur27g91687	1
Tetra_1989	tetur04g92219	1	no unique probes on array	-
Tetra_2446	tetur28g00270	1	tetur28g00270	1
Tetra_1988	tetur04g92208	1	no unique probes on array	-
Tetra_1986	tetur04g90888, tetur04g90882	2	no unique probes on array	-
Tetra_1985	tetur04g90877	1	no unique probes on array	-
Tetra_1984	tetur03g09810, tetur03g91928	2	no unique probes on array	-
Tetra_1970	tetur03g05610	1	no unique probes on array	-
Tetra_2451	tetur29g01100	1	tetur29g01100	1
Tetra_2452	tetur28g01680	1	tetur28g01680	1
Tetra_2453	tetur28g01990	1	tetur28g01990	1
Tetra_2454	tetur28g02140	1	tetur28g02140	1
Tetra_2455	tetur28g02150	1	tetur28g02150	1
Tetra_2456	tetur314g90452, tetur02g10630	2	tetur02g10630	1
Tetra_1968	tetur03g06810	1	no unique probes on array	-
Tetra_1967	tetur03g02470	1	no unique probes on array	-
Tetra_2459	tetur31g00480	1	tetur31g00480	1
Tetra_246	tetur08g02630, tetur08g02650	2	tetur08g02630, tetur08g02650	2
Tetra_2460	tetur31g00600	1	tetur31g00600	1
Tetra_2461	tetur30g02100	1	tetur30g02100	1
Tetra_2462	tetur31g01470	1	tetur31g01470	1
Tetra_2463	tetur31g01550, tetur09g92876	2	tetur31g01550	1
Tetra_2464	tetur31g01820	1	tetur31g01820	1
Tetra_2465	tetur31g01830	1	tetur31g01830	1
Tetra_1965	tetur03g91575	1	no unique probes on array	-
Tetra_2467	tetur32g90851, tetur20g01380	2	tetur20g01380, tetur32g90851	2
Tetra_1963	tetur03g91535	1	no unique probes on array	-
Tetra_2469	tetur33g00570	1	tetur33g00570	1
Tetra_247	tetur02g90683, tetur04g04560, tetur07g01880	3	tetur04g04560, tetur07g01880	2
Tetra_2470	tetur33g00580	1	tetur33g00580	1
Tetra_2471	tetur34g01140	1	tetur34g01140	1
Tetra_2472	tetur34g01160	1	tetur34g01160	1
Tetra_2473	tetur34g91807, tetur04g92269	2	tetur34g91807	1
Tetra_2474	tetur353g00020, tetur353g00010	2	tetur353g00020	1
Tetra_2475	tetur35g00440	1	tetur35g00440	1
Tetra_2476	tetur35g00470	1	tetur35g00470	1
Tetra_2477	tetur35g00680	1	tetur35g00680	1
Tetra_1962	tetur03g91509	1	no unique probes on array	-
Tetra_2479	tetur32g00790	1	tetur32g00790	1
Tetra_1961	tetur03g91500, tetur03g91499	2	no unique probes on array	-
Tetra_2480	tetur32g00810	1	tetur32g00810	1
Tetra_2481	tetur32g00840	1	tetur32g00840	1
Tetra_2482	tetur32g00860	1	tetur32g00860	1
Tetra_2483	tetur32g01260	1	tetur32g01260	1
Tetra_2484	tetur32g01530	1	tetur32g01530	1
Tetra_2485	tetur32g01860	1	tetur32g01860	1
Tetra_2486	tetur32g01930	1	tetur32g01930	1
Tetra_2487	tetur33g00730, tetur10g92062	2	tetur33g00730	1
Tetra_2488	tetur33g00930	1	tetur33g00930	1
Tetra_2489	tetur33g01090	1	tetur33g01090	1
Tetra_249	tetur01g05410, tetur23g01690, tetur23g01710, tetur23g01740	4	tetur23g01690	1
Tetra_2490	tetur33g01110	1	tetur33g01110	1
Tetra_2491	tetur33g01310, tetur33g01300	2	tetur33g01300, tetur33g01310	2
Tetra_2492	tetur33g01560	1	tetur33g01560	1
Tetra_1960	tetur03g10032, tetur03g10031	2	no unique probes on array	-
Tetra_1957	tetur03g04030, tetur03g04020	2	no unique probes on array	-
Tetra_1947	tetur02g92538	1	no unique probes on array	-
Tetra_2496	tetur34g00470	1	tetur34g00470	1
Tetra_2497	tetur34g00540	1	tetur34g00540	1
Tetra_2498	tetur34g00690	1	tetur34g00690	1
Tetra_2499	tetur35g01520	1	tetur35g01520	1
Tetra_1941	tetur02g90619	1	no unique probes on array	-
Tetra_250	tetur01g05530, tetur02g01610, tetur30g00150	3	tetur01g05530, tetur02g01610, tetur30g00150	3
Tetra_1938	tetur02g10580, tetur02g90673	2	no unique probes on array	-
Tetra_2501	tetur35g01676	1	tetur35g01676	1
Tetra_1935	tetur02g90998, tetur02g07640	2	no unique probes on array	-
Tetra_1934	tetur02g90718, tetur02g07540	2	no unique probes on array	-
Tetra_1933	tetur02g90709, tetur02g90708	2	no unique probes on array	-
Tetra_1931	tetur02g90690, tetur02g90688	2	no unique probes on array	-
Tetra_1921	tetur02g09550	1	no unique probes on array	-
Tetra_2507	tetur36g00870	1	tetur36g00870	1
Tetra_2508	tetur38g00620	1	tetur38g00620	1
Tetra_2509	tetur38g00670	1	tetur38g00670	1
Tetra_1914	tetur02g06000	1	no unique probes on array	-
Tetra_1904	tetur02g01060	1	no unique probes on array	-
Tetra_2512	tetur39g00120, tetur145g00010	2	tetur145g00010, tetur39g00120	2
Tetra_2513	tetur39g00190	1	tetur39g00190	1
Tetra_2514	tetur36g01110	1	tetur36g01110	1
Tetra_2515	tetur36g01310	1	tetur36g01310	1
Tetra_1897	tetur02g04650	1	no unique probes on array	-
Tetra_2517	tetur37g00030	1	tetur37g00030	1
Tetra_2518	tetur37g00170	1	tetur37g00170	1
Tetra_2519	tetur37g00180	1	tetur37g00180	1
Tetra_252	tetur25g01610, tetur25g01800, tetur25g01810	3	tetur25g01610, tetur25g01810	2
Tetra_2520	tetur41g00290	1	tetur41g00290	1
Tetra_2521	tetur41g00540	1	tetur41g00540	1
Tetra_2522	tetur42g00110, tetur368g00010	2	tetur368g00010	1
Tetra_1896	tetur02g04450	1	no unique probes on array	-
Tetra_2524	tetur47g00020, tetur33g01180	2	tetur33g01180, tetur47g00020	2
Tetra_2525	tetur483g00020	1	tetur483g00020	1
Tetra_2526	tetur37g00540	1	tetur37g00540	1
Tetra_2527	tetur37g00850	1	tetur37g00850	1
Tetra_2528	tetur43g90785	1	tetur43g90785	1
Tetra_2529	tetur448g00010, tetur14g04080	2	tetur14g04080, tetur448g00010	2
Tetra_253	tetur30g00040, tetur30g00140, tetur30g02200	3	tetur30g00040, tetur30g00140, tetur30g02200	3
Tetra_2530	tetur44g00150	1	tetur44g00150	1
Tetra_2531	tetur45g00040, tetur45g00030	2	tetur45g00030, tetur45g00040	2
Tetra_2532	tetur45g90011, tetur45g00080	2	tetur45g00080	1
Tetra_1891	tetur01g17064	1	no unique probes on array	-
Tetra_2534	tetur62g00010, tetur31g01570	2	tetur31g01570, tetur62g00010	2
Tetra_1887	tetur01g92427	1	no unique probes on array	-
Tetra_1886	tetur01g92425	1	no unique probes on array	-
Tetra_1885	tetur01g92415	1	no unique probes on array	-
Tetra_2538	tetur39g90809, tetur31g00010	2	tetur31g00010	1
Tetra_2539	tetur418g00030	1	tetur418g00030	1
Tetra_254	tetur20g01930, tetur20g02010, tetur472g00020, tetur619g00010	4	tetur20g02010, tetur472g00020, tetur619g00010	3
Tetra_2540	tetur41g00240, tetur26g02710	2	tetur41g00240	1
Tetra_1884	tetur01g92411	1	no unique probes on array	-
Tetra_2542	tetur79g00030, tetur08g04570	2	tetur08g04570	1
Tetra_1883	tetur01g92376	1	no unique probes on array	-
Tetra_255	tetur04g09501, tetur04g03160, tetur04g03180	3	tetur04g03160	1
Tetra_256	tetur06g04790, tetur06g04810	2	tetur06g04790	1
Tetra_257	tetur01g11290, tetur02g07800, tetur03g00150, tetur12g00740	4	tetur01g11290, tetur02g07800, tetur03g00150	3
Tetra_258	tetur02g09600, tetur02g90697	2	tetur02g09600	1
Tetra_259	tetur01g05610, tetur01g05620, tetur114g00050, tetur37g00260	4	tetur01g05610, tetur114g00050, tetur37g00260	3
Tetra_26	tetur02g90620, tetur02g90621, tetur02g90624, tetur02g90626, tetur02g90627, tetur02g90631, tetur02g90632, tetur02g90633, tetur02g90634, tetur02g90635, tetur02g90636, tetur02g13880, tetur02g13900, tetur02g13940, tetur02g13950, tetur02g13980, tetur02g13990, tetur02g14030, tetur02g14040, tetur05g05230, tetur16g03660, tetur83g00020, tetur83g00030, tetur83g90112, tetur83g90373	25	tetur02g13880, tetur02g13940, tetur02g13950, tetur02g13990, tetur02g14040, tetur02g90626, tetur02g90632, tetur05g05230, tetur16g03660, tetur83g00020, tetur83g00030, tetur83g90112, tetur83g90373	13
Tetra_1882	tetur01g92366	1	no unique probes on array	-
Tetra_261	tetur01g04520, tetur01g04130, tetur05g05620, tetur09g92860, tetur12g02980, tetur14g01660	6	tetur01g04130, tetur01g04520, tetur05g05620, tetur12g02980, tetur14g01660	5
Tetra_1881	tetur01g92354	1	no unique probes on array	-
Tetra_263	tetur02g92477, tetur01g15790, tetur05g01690, tetur07g06400, tetur09g00930, tetur211g00010	6	tetur01g15790, tetur05g01690, tetur07g06400, tetur09g00930, tetur211g00010	5
Tetra_264	tetur05g02390, tetur05g02420, tetur49g00080, tetur49g00120, tetur49g00170	5	tetur05g02390, tetur05g02420, tetur49g00080, tetur49g00120, tetur49g00170	5
Tetra_265	tetur09g01020, tetur09g01000, tetur09g01050, tetur11g03420, tetur13g02160, tetur645g00010	6	tetur09g01000, tetur09g01050, tetur11g03420, tetur13g02160	4
Tetra_266	tetur15g04080, tetur01g14100, tetur09g01940, tetur18g00350, tetur24g02240, tetur31g00040	6	tetur01g14100, tetur09g01940, tetur18g00350, tetur24g02240	4
Tetra_268	tetur18g01950	1	tetur18g01950	1
Tetra_269	tetur01g11090, tetur28g02380	2	tetur01g11090, tetur28g02380	2
Tetra_27	tetur01g05160, tetur05g08660, tetur05g08670, tetur05g08690, tetur08g02970, tetur08g04460, tetur17g02340, tetur20g03230, tetur28g01890, tetur28g01900, tetur38g00300	11	tetur01g05160, tetur05g08660, tetur05g08670, tetur05g08690, tetur08g02970, tetur08g04460, tetur17g02340, tetur20g03230, tetur28g01890, tetur28g01900, tetur38g00300	11
Tetra_270	tetur17g92161, tetur17g00500	2	tetur17g00500, tetur17g92161	2
Tetra_188	tetur17g92146	1	no unique probes on array	-
Tetra_275	tetur10g03040, tetur10g03080	2	tetur10g03040, tetur10g03080	2
Tetra_276	tetur01g16774, tetur13g00950	2	tetur13g00950	1
Tetra_277	tetur11g02590, tetur11g03180	2	tetur11g02590, tetur11g03180	2
Tetra_1878	tetur01g15370	1	no unique probes on array	-
Tetra_28	tetur02g02980, tetur02g14300, tetur02g90642, tetur03g10377, tetur03g02480, tetur03g02840, tetur04g08990, tetur06g03900, tetur07g07490, tetur07g06470, tetur11g02840, tetur11g02850, tetur16g03400, tetur21g00340, tetur21g01380, tetur21g01390, tetur74g00030	17	tetur02g02980, tetur02g14300, tetur03g02480, tetur04g08990, tetur07g06470, tetur11g02840, tetur11g02850, tetur16g03400, tetur21g00340, tetur21g01380, tetur21g01390, tetur74g00030	12
Tetra_280	tetur04g04480	1	tetur04g04480	1
Tetra_281	tetur10g00300	1	tetur10g00300	1
Tetra_282	tetur03g02210, tetur10g05170	2	tetur03g02210	1
Tetra_283	tetur17g01630	1	tetur17g01630	1
Tetra_284	tetur39g00600, tetur39g00610	2	tetur39g00600, tetur39g00610	2
Tetra_1875	tetur01g92326, tetur01g92323	2	no unique probes on array	-
Tetra_287	tetur10g04520, tetur24g01550	2	tetur10g04520, tetur24g01550	2
Tetra_288	tetur05g04540	1	tetur05g04540	1
Tetra_289	tetur27g02050, tetur556g00010	2	tetur27g02050, tetur556g00010	2
Tetra_29	tetur05g09280, tetur05g06300, tetur05g06310, tetur05g06320, tetur05g06330, tetur05g06340, tetur05g06350, tetur05g06360, tetur05g06370, tetur05g06380, tetur05g06390, tetur05g06400, tetur05g06410, tetur05g06420, tetur05g06430, tetur05g06440, tetur05g06450, tetur05g06460, tetur05g06470, tetur05g06480, tetur05g92676, tetur05g92677, tetur05g92678, tetur13g01630	24	tetur05g06300, tetur05g06310, tetur05g06320, tetur05g06330, tetur05g06340, tetur05g06350, tetur05g06360, tetur05g06370, tetur05g06390, tetur05g06400, tetur05g06410, tetur05g06420, tetur05g06430, tetur05g06440, tetur05g06450, tetur05g06460, tetur05g06470, tetur05g09280, tetur13g01630	19
Tetra_290	tetur06g05180, tetur50g00010	2	tetur06g05180, tetur50g00010	2
Tetra_291	tetur02g13320, tetur08g03430	2	tetur02g13320, tetur08g03430	2
Tetra_292	tetur09g01290, tetur38g00140	2	tetur09g01290, tetur38g00140	2
Tetra_293	tetur09g01200	1	tetur09g01200	1
Tetra_294	tetur13g03460	1	tetur13g03460	1
Tetra_295	tetur17g03860, tetur17g03870, tetur17g03880	3	tetur17g03860, tetur17g03870, tetur17g03880	3
Tetra_296	tetur02g03430, tetur17g03120	2	tetur02g03430, tetur17g03120	2
Tetra_1874	tetur01g92298	1	no unique probes on array	-
Tetra_298	tetur17g02240, tetur17g02300	2	tetur17g02240, tetur17g02300	2
Tetra_299	tetur10g02460	1	tetur10g02460	1
Tetra_3	tetur02g04810, tetur02g02750, tetur02g09200, tetur02g92493, tetur02g92516, tetur04g09629, tetur04g92234, tetur04g92236, tetur04g05690, tetur04g04320, tetur04g04680, tetur04g04690, tetur04g04710, tetur04g04720, tetur04g04740, tetur04g04750, tetur05g07410, tetur06g01410, tetur06g91408, tetur10g05280, tetur13g03410, tetur14g01110, tetur14g01130, tetur14g01150, tetur14g01200, tetur04g92282, tetur14g0…	175	tetur02g02750, tetur02g04810, tetur02g09200, tetur04g04320, tetur04g04710, tetur04g04720, tetur04g04750, tetur04g05690, tetur04g09629, tetur05g07410, tetur06g01410, tetur10g05280, tetur13g03410, tetur14g01110, tetur14g01130, tetur14g01150, tetur14g01200, tetur14g03130, tetur14g03180, tetur15g01420, tetur15g01430, tetur15g01440, tetur15g01450, tetur15g01460, tetur15g01470, tetur15g01520, tetur15g0…	132
Tetra_30	tetur07g03360, tetur10g01020, tetur12g01000, tetur14g02810, tetur269g00010, tetur354g00010, tetur44g00120, tetur01g92368	8	tetur07g03360, tetur10g01020, tetur12g01000, tetur14g02810, tetur269g00010, tetur44g00120	6
Tetra_300	tetur02g10330, tetur03g03130	2	tetur02g10330, tetur03g03130	2
Tetra_301	tetur07g05330, tetur13g03450	2	tetur07g05330, tetur13g03450	2
Tetra_302	tetur03g08780, tetur11g01550	2	tetur03g08780, tetur11g01550	2
Tetra_303	tetur25g01220, tetur25g01350	2	tetur25g01220, tetur25g01350	2
Tetra_304	tetur06g02110, tetur06g02150	2	tetur06g02110	1
Tetra_305	tetur01g08560, tetur27g00190	2	tetur01g08560, tetur27g00190	2
Tetra_306	tetur01g13330, tetur01g13340	2	tetur01g13330, tetur01g13340	2
Tetra_307	tetur01g00940, tetur01g01010	2	tetur01g00940, tetur01g01010	2
Tetra_308	tetur13g01210, tetur13g01870	2	tetur13g01870	1
Tetra_309	tetur03g06630, tetur05g06910	2	tetur03g06630, tetur05g06910	2
Tetra_31	tetur02g07460, tetur02g07480, tetur02g07500, tetur02g07520, tetur02g07610, tetur02g07680, tetur02g07700, tetur02g07970, tetur02g08000, tetur02g08050, tetur02g08090, tetur02g08160, tetur02g09700, tetur02g09750, tetur02g09770, tetur02g09790, tetur07g04900, tetur07g04910, tetur07g04930, tetur07g91859, tetur07g04110, tetur07g04250, tetur07g04260, tetur20g90760, tetur472g00010	25	tetur02g07480, tetur02g07610, tetur02g07700, tetur02g08050, tetur02g08160, tetur02g09700, tetur02g09750, tetur02g09770, tetur02g09790, tetur07g04110, tetur07g04250, tetur07g04260, tetur07g04900, tetur07g04910, tetur07g04930, tetur472g00010	16
Tetra_1873	tetur01g91176	1	no unique probes on array	-
Tetra_1872	tetur01g91158	1	no unique probes on array	-
Tetra_312	tetur04g07140, tetur27g01640	2	tetur27g01640	1
Tetra_313	tetur139g00030, tetur22g00500	2	tetur22g00500	1
Tetra_315	tetur13g00540, tetur13g00560	2	tetur13g00540, tetur13g00560	2
Tetra_316	tetur04g03330, tetur10g04080, tetur28g01750	3	tetur04g03330, tetur10g04080, tetur28g01750	3
Tetra_317	tetur05g08750, tetur05g92672	2	tetur05g08750	1
Tetra_318	tetur09g00560, tetur09g04290	2	tetur09g04290	1
Tetra_1871	tetur01g91132	1	no unique probes on array	-
Tetra_1870	tetur01g07890	1	no unique probes on array	-
Tetra_321	tetur13g02200	1	tetur13g02200	1
Tetra_322	tetur06g00230	1	tetur06g00230	1
Tetra_323	tetur08g00620, tetur08g00630	2	tetur08g00620	1
Tetra_324	tetur22g01900, tetur22g01970	2	tetur22g01900, tetur22g01970	2
Tetra_325	tetur12g03980, tetur66g00030, tetur66g00140	3	tetur12g03980, tetur66g00140	2
Tetra_1869	tetur01g07390	1	no unique probes on array	-
Tetra_327	tetur17g00900, tetur18g01750	2	tetur17g00900, tetur18g01750	2
Tetra_328	tetur08g06210, tetur169g00020	2	tetur08g06210	1
Tetra_329	tetur05g07690, tetur33g00220	2	tetur05g07690, tetur33g00220	2
Tetra_33	tetur03g04060, tetur03g04080, tetur03g04090, tetur03g04500, tetur03g04530, tetur03g04610, tetur05g08600, tetur07g91898, tetur10g03460, tetur11g01450, tetur16g00450	11	tetur03g04080, tetur03g04500, tetur03g04530, tetur03g04610, tetur05g08600, tetur10g03460, tetur11g01450, tetur16g00450	8
Tetra_330	tetur03g04460, tetur03g04470	2	tetur03g04460, tetur03g04470	2
Tetra_331	tetur24g02300, tetur24g02310	2	tetur24g02300, tetur24g02310	2
Tetra_332	tetur19g01080, tetur19g01050	2	tetur19g01050	1
Tetra_333	tetur07g01660	1	tetur07g01660	1
Tetra_334	tetur07g91828, tetur07g07770, tetur34g00040	3	tetur07g07770	1
Tetra_336	tetur02g14250, tetur47g00190, tetur47g00220	3	tetur47g00190, tetur47g00220	2
Tetra_337	tetur07g06660, tetur07g06670	2	tetur07g06660	1
Tetra_338	tetur03g01520	1	tetur03g01520	1
Tetra_339	tetur169g00030, tetur25g01500, tetur01g92350	3	tetur169g00030, tetur25g01500	2
Tetra_34	tetur02g15081, tetur02g15327, tetur02g90644, tetur02g90646, tetur02g90647, tetur02g90648, tetur02g90650, tetur02g90651, tetur02g12450, tetur02g12460, tetur02g14871, tetur06g91357, tetur06g91359, tetur12g03210, tetur13g92962, tetur56g00020, tetur56g90039, tetur56g90040, tetur56g90043, tetur56g90044, tetur56g90045, tetur56g90047	22	tetur02g12450, tetur02g12460, tetur02g15081, tetur06g91359, tetur12g03210, tetur56g00020	6
Tetra_340	tetur20g01590, tetur39g00470	2	tetur20g01590, tetur39g00470	2
Tetra_341	tetur19g02240, tetur19g02270	2	tetur19g02240	1
Tetra_342	tetur02g06110, tetur02g06170, tetur126g00010	3	tetur126g00010	1
Tetra_343	tetur33g00530, tetur33g00540	2	tetur33g00530, tetur33g00540	2
Tetra_344	tetur03g03050, tetur03g91581, tetur29g92555, tetur68g90096	4	tetur03g03050	1
Tetra_345	tetur03g91515, tetur12g03270, tetur01g16483, tetur16g03876	4	tetur01g16483, tetur12g03270, tetur16g03876	3
Tetra_346	tetur04g02500, tetur03g04550, tetur04g07490, tetur80g00050	4	tetur03g04550, tetur04g02500, tetur80g00050	3
Tetra_347	tetur05g92659, tetur04g92242, tetur11g90957, tetur123g00010	4	tetur123g00010	1
Tetra_348	tetur10g03890, tetur14g03810, tetur17g02390, tetur285g00020	4	tetur10g03890, tetur14g03810, tetur17g02390	3
Tetra_349	tetur11g04850, tetur139g00040, tetur22g00470, tetur23g00080	4	tetur139g00040, tetur23g00080	2
Tetra_35	tetur01g12430, tetur01g07430, tetur01g07440, tetur01g07460, tetur01g07950, tetur01g07960, tetur01g08020, tetur01g08220, tetur01g08290, tetur01g91174, tetur01g15040, tetur01g92398, tetur01g92399, tetur01g92402, tetur01g92405, tetur02g14320, tetur07g03650, tetur10g04090, tetur47g00100, tetur47g00130, tetur86g00040	21	tetur01g07430, tetur01g07440, tetur01g07460, tetur01g07950, tetur01g07960, tetur01g08020, tetur01g08220, tetur01g15040, tetur07g03650, tetur10g04090, tetur47g00130	11
Tetra_350	tetur35g00560, tetur35g00570, tetur35g00590, tetur35g00620, tetur35g91785	5	tetur35g00560, tetur35g00570, tetur35g00590, tetur35g00620	4
Tetra_351	tetur32g00070, tetur504g00010, tetur72g00040, tetur72g00050	4	tetur32g00070, tetur504g00010, tetur72g00040, tetur72g00050	4
Tetra_352	tetur37g00880	1	tetur37g00880	1
Tetra_353	tetur09g06500	1	tetur09g06500	1
Tetra_354	tetur03g02390	1	tetur03g02390	1
Tetra_356	tetur07g06760	1	tetur07g06760	1
Tetra_357	tetur07g03280	1	tetur07g03280	1
Tetra_358	tetur06g00510, tetur29g01360	2	tetur29g01360	1
Tetra_359	tetur09g00370	1	tetur09g00370	1
Tetra_36	tetur30g90546, tetur30g90547, tetur30g01650, tetur30g01660, tetur30g01680, tetur30g01730, tetur30g01760, tetur30g01770, tetur30g01780, tetur30g01800, tetur30g01820, tetur30g01840, tetur30g01870, tetur30g01900, tetur30g01930, tetur30g02120, tetur30g90541, tetur30g90543, tetur30g90545	19	tetur30g01650, tetur30g01660, tetur30g01680, tetur30g01730, tetur30g01760, tetur30g01770, tetur30g01780, tetur30g01800, tetur30g01820, tetur30g01840, tetur30g01870, tetur30g01900, tetur30g01930, tetur30g02120	14
Tetra_360	tetur02g00920	1	tetur02g00920	1
Tetra_361	tetur02g02430	1	tetur02g02430	1
Tetra_362	tetur17g02190, tetur17g02210	2	tetur17g02190, tetur17g02210	2
Tetra_363	tetur12g02460	1	tetur12g02460	1
Tetra_364	tetur251g00020, tetur54g00080	2	tetur251g00020, tetur54g00080	2
Tetra_365	tetur21g00590	1	tetur21g00590	1
Tetra_366	tetur04g06060	1	tetur04g06060	1
Tetra_367	tetur02g11980	1	tetur02g11980	1
Tetra_368	tetur06g01430	1	tetur06g01430	1
Tetra_369	tetur02g10340	1	tetur02g10340	1
Tetra_1867	tetur01g13390	1	no unique probes on array	-
Tetra_370	tetur11g04640	1	tetur11g04640	1
Tetra_371	tetur03g06580	1	tetur03g06580	1
Tetra_372	tetur03g02460	1	tetur03g02460	1
Tetra_373	tetur15g02700	1	tetur15g02700	1
Tetra_374	tetur20g00130	1	tetur20g00130	1
Tetra_375	tetur04g04820, tetur04g04830	2	tetur04g04820, tetur04g04830	2
Tetra_376	tetur04g04640	1	tetur04g04640	1
Tetra_377	tetur179g00010, tetur19g00500	2	tetur19g00500	1
Tetra_378	tetur07g04840	1	tetur07g04840	1
Tetra_1860	tetur01g10890	1	no unique probes on array	-
Tetra_38	tetur11g01150, tetur11g01170, tetur11g01200, tetur11g00750, tetur11g00760, tetur11g00770, tetur11g00810, tetur11g00840, tetur11g00850, tetur11g00860, tetur11g00880, tetur11g00900, tetur11g00940, tetur11g00950, tetur11g00960, tetur11g00990, tetur11g01020, tetur11g01040, tetur11g01080, tetur11g01100, tetur11g01130, tetur11g06502, tetur11g90923, tetur11g90925	24	tetur11g00760, tetur11g00770, tetur11g00810, tetur11g00840, tetur11g00850, tetur11g00860, tetur11g00880, tetur11g00940, tetur11g00950, tetur11g00960, tetur11g00990, tetur11g01020, tetur11g01040, tetur11g01080, tetur11g01100, tetur11g01130, tetur11g01150, tetur11g01170, tetur11g01200	19
Tetra_380	tetur26g02080	1	tetur26g02080	1
Tetra_381	tetur13g03990	1	tetur13g03990	1
Tetra_382	tetur38g00400	1	tetur38g00400	1
Tetra_383	tetur361g00010, tetur38g00030	2	tetur38g00030	1
Tetra_384	tetur06g02160	1	tetur06g02160	1
Tetra_385	tetur21g02810, tetur21g02830	2	tetur21g02810	1
Tetra_386	tetur21g02550	1	tetur21g02550	1
Tetra_387	tetur01g10850, tetur01g10880	2	tetur01g10850, tetur01g10880	2
Tetra_388	tetur26g01210, tetur26g91088	2	tetur26g01210	1
Tetra_1856	tetur01g12500	1	no unique probes on array	-
Tetra_39	tetur05g09110, tetur05g09120, tetur05g09010, tetur05g09130, tetur08g07760, tetur08g07790, tetur08g07920, tetur08g08251, tetur20g02940, tetur19g02390, tetur437g00010, tetur43g00450, tetur614g00010	13	tetur05g09010, tetur05g09110, tetur05g09120, tetur08g07920, tetur19g02390, tetur20g02940, tetur43g00450, tetur614g00010	8
Tetra_390	tetur27g00380, tetur27g91686	2	tetur27g00380	1
Tetra_391	tetur06g01350	1	tetur06g01350	1
Tetra_392	tetur13g01730, tetur13g01740	2	tetur13g01730, tetur13g01740	2
Tetra_1837	tetur01g05960	1	no unique probes on array	-
Tetra_394	tetur26g00530, tetur26g00590	2	tetur26g00590	1
Tetra_395	tetur01g04370	1	tetur01g04370	1
Tetra_1818	tetur01g01580	1	no unique probes on array	-
Tetra_397	tetur02g02080, tetur02g02130	2	tetur02g02080, tetur02g02130	2
Tetra_398	tetur10g03440	1	tetur10g03440	1
Tetra_399	tetur05g03690	1	tetur05g03690	1
Tetra_4	tetur01g92312, tetur01g16734, tetur01g16744, tetur01g16754, tetur01g16784, tetur01g16834, tetur01g16844, tetur01g16854, tetur01g16864, tetur02g06680, tetur02g06690, tetur02g06710, tetur02g06720, tetur02g06730, tetur02g06740, tetur02g06750, tetur02g06760, tetur02g06770, tetur02g06780, tetur02g06800, tetur02g06810, tetur02g06820, tetur02g06830, tetur02g06860, tetur02g06870, tetur02g08860, tetur02g9…	139	tetur01g16864, tetur02g06680, tetur02g06690, tetur02g06710, tetur02g06720, tetur02g06730, tetur02g06740, tetur02g06750, tetur02g06760, tetur02g06770, tetur02g06780, tetur02g06820, tetur02g06870, tetur02g08860, tetur02g14340, tetur02g14350, tetur02g15237, tetur03g04270, tetur03g07800, tetur03g07910, tetur07g04990, tetur07g05000, tetur07g05030, tetur07g08097, tetur08g00530, tetur08g00540, tetur08g0…	64
Tetra_40	tetur03g03380, tetur03g02690, tetur04g08980, tetur08g03260, tetur01g13300, tetur12g01440, tetur17g00370, tetur17g01240, tetur193g00010, tetur01g12060, tetur19g02090, tetur22g92568, tetur30g02549, tetur31g02010, tetur63g00080, tetur81g00010, tetur83g00040	17	tetur01g12060, tetur01g13300, tetur03g03380, tetur08g03260, tetur12g01440, tetur193g00010, tetur30g02549, tetur31g02010, tetur63g00080, tetur81g00010, tetur83g00040	11
Tetra_400	tetur05g01770	1	tetur05g01770	1
Tetra_401	tetur11g04740	1	tetur11g04740	1
Tetra_402	tetur22g02960, tetur29g00030	2	tetur29g00030	1
Tetra_1810	tetur01g03380	1	no unique probes on array	-
Tetra_1809	tetur01g03350	1	no unique probes on array	-
Tetra_405	tetur37g00530	1	tetur37g00530	1
Tetra_406	tetur11g06010	1	tetur11g06010	1
Tetra_1807	tetur01g02970	1	no unique probes on array	-
Tetra_408	tetur11g00130, tetur11g00140	2	tetur11g00130, tetur11g00140	2
Tetra_409	tetur04g09511, tetur10g04150	2	tetur04g09511, tetur10g04150	2
Tetra_41	tetur01g17194, tetur02g15435, tetur09g07550, tetur10g01860, tetur117g00090, tetur15g04127, tetur16g90558, tetur24g92175	8	tetur10g01860	1
Tetra_410	tetur32g00120	1	tetur32g00120	1
Tetra_1776	tetur01g17134	1	no unique probes on array	-
Tetra_412	tetur09g03750, tetur09g07490	2	tetur09g03750	1
Tetra_414	tetur21g01310	1	tetur21g01310	1
Tetra_415	tetur21g01140, tetur21g01150	2	tetur21g01140, tetur21g01150	2
Tetra_416	tetur01g07160	1	tetur01g07160	1
Tetra_417	tetur08g07410, tetur23g00930	2	tetur23g00930	1
Tetra_418	tetur12g00370, tetur12g04687	2	tetur12g00370, tetur12g04687	2
Tetra_163	tetur12g00020, tetur12g00030, tetur12g00040, tetur12g00050, tetur27g02490	5	no unique probes on array	-
Tetra_42	tetur01g04350, tetur08g06390, tetur108g00030, tetur126g00030, tetur126g90126, tetur161g00020, tetur20g00320, tetur20g02220, tetur21g01940, tetur22g01950, tetur25g92701, tetur37g00250, tetur01g04340, tetur451g00010, tetur77g00080	15	tetur01g04340, tetur01g04350, tetur08g06390, tetur108g00030, tetur126g00030, tetur161g00020, tetur20g00320, tetur20g02220, tetur21g01940, tetur22g01950, tetur37g00250, tetur451g00010, tetur77g00080	13
Tetra_420	tetur01g10650, tetur01g10670	2	tetur01g10650	1
Tetra_421	tetur02g07850	1	tetur02g07850	1
Tetra_423	tetur08g06120	1	tetur08g06120	1
Tetra_425	tetur08g02120	1	tetur08g02120	1
Tetra_426	tetur01g91144, tetur26g00040	2	tetur26g00040	1
Tetra_427	tetur10g03110	1	tetur10g03110	1
Tetra_428	tetur21g01630, tetur21g01640	2	tetur21g01640	1
Tetra_429	tetur10g00150, tetur10g00160	2	tetur10g00150	1
Tetra_43	tetur08g01370, tetur08g01380, tetur08g01390, tetur08g01400, tetur08g01420, tetur08g01440, tetur08g01450, tetur08g01490, tetur08g01510, tetur08g08299, tetur08g08309, tetur08g08319, tetur08g08329, tetur08g08379	14	tetur08g01370, tetur08g01380, tetur08g01390, tetur08g01400, tetur08g01420, tetur08g01440, tetur08g01450, tetur08g01510, tetur08g08299, tetur08g08309, tetur08g08329	11
Tetra_430	tetur07g03040	1	tetur07g03040	1
Tetra_161	tetur25g92723, tetur31g90813, tetur44g90872	3	no unique probes on array	-
Tetra_157	tetur06g06853	1	no unique probes on array	-
Tetra_433	tetur43g00540	1	tetur43g00540	1
Tetra_156	tetur03g01900, tetur09g92913, tetur191g00030	3	no unique probes on array	-
Tetra_149	tetur117g00100, tetur25g92722	2	no unique probes on array	-
Tetra_436	tetur17g00430, tetur32g00540	2	tetur17g00430	1
Tetra_1472	tetur32g90852, tetur39g90804	2	no unique probes on array	-
Tetra_438	tetur18g00400	1	tetur18g00400	1
Tetra_439	tetur01g11410, tetur01g11430	2	tetur01g11430	1
Tetra_44	tetur01g05860, tetur01g11280, tetur02g05310, tetur02g03030, tetur02g90713, tetur03g00160, tetur04g08200, tetur10g92061, tetur146g00030, tetur23g02449, tetur47g00080, tetur607g90275	12	tetur01g05860, tetur01g11280, tetur02g03030, tetur02g05310, tetur03g00160, tetur04g08200, tetur146g00030, tetur23g02449, tetur47g00080	9
Tetra_440	tetur01g10050, tetur146g00010	2	tetur146g00010	1
Tetra_441	tetur01g09790, tetur01g92428	2	tetur01g09790	1
Tetra_442	tetur07g06330, tetur15g00940	2	tetur07g06330, tetur15g00940	2
Tetra_444	tetur05g02710, tetur05g02760	2	tetur05g02710, tetur05g02760	2
Tetra_1467	tetur24g01480, tetur24g01490	2	no unique probes on array	-
Tetra_446	tetur05g02040	1	tetur05g02040	1
Tetra_1466	tetur24g02983, tetur53g00120	2	no unique probes on array	-
Tetra_448	tetur15g02500, tetur15g91265	2	tetur15g02500	1
Tetra_449	tetur10g00940, tetur10g00990	2	tetur10g00990	1
Tetra_45	tetur11g02820, tetur11g02790, tetur11g02830, tetur11g02800, tetur11g02870, tetur11g02860, tetur11g02880, tetur11g02890, tetur11g02910, tetur11g02920, tetur11g02930, tetur11g02950, tetur11g02960, tetur11g02970, tetur11g02980, tetur11g02990, tetur11g03000, tetur11g03010, tetur11g90955, tetur11g90956, tetur11g90958, tetur11g90959	22	tetur11g02790, tetur11g02800, tetur11g02820, tetur11g02830, tetur11g02860, tetur11g02870, tetur11g02880, tetur11g02890, tetur11g02910, tetur11g02920, tetur11g02930, tetur11g02950, tetur11g02960, tetur11g02970, tetur11g02980, tetur11g02990, tetur11g03000, tetur11g03010	18
Tetra_450	tetur03g01500	1	tetur03g01500	1
Tetra_451	tetur12g02670, tetur12g02680	2	tetur12g02670, tetur12g02680	2
Tetra_452	tetur12g02320, tetur12g02330	2	tetur12g02320, tetur12g02330	2
Tetra_453	tetur12g02110, tetur12g02260	2	tetur12g02110, tetur12g02260	2
Tetra_1464	tetur20g90754, tetur20g02510	2	no unique probes on array	-
Tetra_455	tetur28g01640	1	tetur28g01640	1
Tetra_456	tetur09g02190	1	tetur09g02190	1
Tetra_457	tetur40g00210, tetur95g00050	2	tetur40g00210, tetur95g00050	2
Tetra_1455	tetur140g00010, tetur14g01710	2	no unique probes on array	-
Tetra_46	tetur07g00430, tetur07g00440, tetur07g00450, tetur07g00970, tetur11g01910, tetur18g01530	6	tetur07g00430, tetur07g00440, tetur07g00450, tetur07g00970, tetur11g01910, tetur18g01530	6
Tetra_460	tetur06g00650, tetur06g91348	2	tetur06g00650	1
Tetra_1454	tetur13g92968, tetur13g92969	2	no unique probes on array	-
Tetra_462	tetur08g04540, tetur14g00990, tetur79g00010	3	tetur14g00990	1
Tetra_463	tetur05g08040, tetur21g00620	2	tetur05g08040, tetur21g00620	2
Tetra_464	tetur14g02650, tetur18g01410	2	tetur14g02650, tetur18g01410	2
Tetra_465	tetur01g91111, tetur07g03660	2	tetur07g03660	1
Tetra_466	tetur18g02960, tetur18g02980	2	tetur18g02960	1
Tetra_467	tetur42g00150, tetur677g00010	2	tetur42g00150	1
Tetra_468	tetur63g00020	1	tetur63g00020	1
Tetra_469	tetur01g16521, tetur11g01610	2	tetur01g16521, tetur11g01610	2
Tetra_47	tetur02g09510, tetur03g04310, tetur05g01140, tetur05g01150, tetur07g06990, tetur12g01360, tetur22g92570, tetur36g00050, tetur39g00420, tetur36g01270	10	tetur02g09510, tetur03g04310, tetur05g01140, tetur05g01150, tetur07g06990, tetur12g01360, tetur36g00050, tetur36g01270, tetur39g00420	9
Tetra_470	tetur16g02890, tetur16g02900	2	tetur16g02900	1
Tetra_471	tetur02g12050, tetur21g03323	2	tetur02g12050, tetur21g03323	2
Tetra_472	tetur01g06300	1	tetur01g06300	1
Tetra_473	tetur03g08390, tetur23g00440	2	tetur03g08390, tetur23g00440	2
Tetra_474	tetur23g00590	1	tetur23g00590	1
Tetra_475	tetur05g07720, tetur183g00050	2	tetur183g00050	1
Tetra_1448	tetur11g00790, tetur11g90927, tetur11g90926	3	no unique probes on array	-
Tetra_477	tetur02g12850	1	tetur02g12850	1
Tetra_1443	tetur09g92892, tetur09g92893	2	no unique probes on array	-
Tetra_479	tetur02g08950, tetur02g08970	2	tetur02g08950	1
Tetra_1442	tetur08g06440	1	no unique probes on array	-
Tetra_481	tetur01g02660, tetur01g02610, tetur14g02050	3	tetur01g02610, tetur01g02660, tetur14g02050	3
Tetra_482	tetur01g92327, tetur01g03450, tetur217g90175, tetur01g03460	4	tetur01g03450, tetur01g03460, tetur217g90175	3
Tetra_483	tetur01g15780, tetur10g05000, tetur419g00010	3	tetur01g15780, tetur10g05000, tetur419g00010	3
Tetra_484	tetur01g92361, tetur03g91497, tetur07g07110, tetur36g00060	4	tetur07g07110, tetur36g00060	2
Tetra_485	tetur03g08400, tetur02g13960, tetur16g03580, tetur30g01270	4	tetur02g13960, tetur03g08400, tetur16g03580, tetur30g01270	4
Tetra_1437	tetur07g91864, tetur13g92965	2	no unique probes on array	-
Tetra_487	tetur04g08920, tetur04g07870, tetur24g02660, tetur270g00010	4	tetur04g07870, tetur04g08920, tetur24g02660, tetur270g00010	4
Tetra_488	tetur04g01480, tetur47g90018, tetur04g07260	3	tetur04g01480, tetur04g07260	2
Tetra_1436	tetur07g91815, tetur34g91810	2	no unique probes on array	-
Tetra_49	tetur07g00920, tetur07g91900, tetur377g00010	3	tetur07g00920, tetur377g00010	2
Tetra_490	tetur07g91860, tetur05g07760, tetur206g00010, tetur21g00470	4	tetur05g07760, tetur206g00010, tetur21g00470	3
Tetra_491	tetur08g05810, tetur08g05820	2	tetur08g05810, tetur08g05820	2
Tetra_492	tetur08g04440	1	tetur08g04440	1
Tetra_493	tetur12g01710	1	tetur12g01710	1
Tetra_494	tetur15g03350, tetur15g91272, tetur32g00650	3	tetur32g00650	1
Tetra_1431	tetur05g92667, tetur60g00030	2	no unique probes on array	-
Tetra_496	tetur178g90155, tetur04g00400, tetur228g90178, tetur26g91097	4	tetur04g00400	1
Tetra_497	tetur17g92160, tetur09g92877, tetur24g02560, tetur40g00380	4	tetur17g92160, tetur24g02560, tetur40g00380	3
Tetra_498	tetur17g01890, tetur17g01820, tetur17g01940, tetur06g00070	4	tetur17g01890, tetur17g01940	2
Tetra_499	tetur18g92092, tetur01g92364, tetur272g00010, tetur08g91666	4	tetur272g00010	1
Tetra_5	tetur01g14890, tetur01g15000, tetur01g15010, tetur01g15050, tetur02g03020, tetur02g03060, tetur02g12970, tetur02g12980, tetur02g13030, tetur02g13040, tetur02g13050, tetur02g13070, tetur02g13080, tetur02g90608, tetur02g90609, tetur02g90610, tetur02g90641, tetur02g14100, tetur02g14120, tetur02g14130, tetur02g14140, tetur02g14150, tetur02g14440, tetur02g14450, tetur02g14460, tetur02g14500, tetur02g1…	115	tetur01g14890, tetur01g15000, tetur01g15010, tetur01g15050, tetur02g03020, tetur02g03060, tetur02g12980, tetur02g13030, tetur02g13040, tetur02g13080, tetur02g14100, tetur02g14120, tetur02g14140, tetur02g14440, tetur02g14450, tetur02g14460, tetur02g14500, tetur03g02750, tetur03g06980, tetur03g06990, tetur03g07010, tetur03g07020, tetur03g07030, tetur03g07040, tetur03g07050, tetur03g07220, tetur03g0…	78
Tetra_1430	tetur05g92608	1	no unique probes on array	-
Tetra_500	tetur18g02050, tetur18g02080, tetur571g00010	3	tetur18g02050, tetur18g02080, tetur571g00010	3
Tetra_501	tetur21g01670, tetur21g01680, tetur21g01700	3	tetur21g01680	1
Tetra_502	tetur22g00680, tetur22g00690, tetur447g00010	3	tetur22g00680, tetur22g00690, tetur447g00010	3
Tetra_503	tetur22g02380, tetur22g92579, tetur22g92578, tetur22g02390	4	tetur22g02380, tetur22g02390	2
Tetra_504	tetur24g00420, tetur24g00620, tetur24g00660	3	tetur24g00420	1
Tetra_505	tetur28g02250, tetur28g02230, tetur28g02270	3	tetur28g02230, tetur28g02250, tetur28g02270	3
Tetra_506	tetur28g01350, tetur24g02620, tetur55g00050, tetur239g90187	4	tetur24g02620, tetur28g01350, tetur55g00050	3
Tetra_507	tetur52g00070, tetur52g00080, tetur52g90036	3	tetur52g00070, tetur52g00080	2
Tetra_508	tetur03g09360	1	tetur03g09360	1
Tetra_51	tetur02g09090, tetur04g03920, tetur12g03920, tetur30g02559, tetur30g00670, tetur30g01380	6	tetur02g09090, tetur04g03920, tetur12g03920, tetur30g00670, tetur30g01380	5
Tetra_511	tetur02g05650	1	tetur02g05650	1
Tetra_512	tetur26g00420	1	tetur26g00420	1
Tetra_513	tetur33g00830	1	tetur33g00830	1
Tetra_514	tetur07g03310	1	tetur07g03310	1
Tetra_515	tetur15g00720	1	tetur15g00720	1
Tetra_516	tetur01g02310	1	tetur01g02310	1
Tetra_517	tetur06g05440	1	tetur06g05440	1
Tetra_519	tetur02g00170	1	tetur02g00170	1
Tetra_52	tetur33g00060	1	tetur33g00060	1
Tetra_520	tetur02g04990	1	tetur02g04990	1
Tetra_1421	tetur03g10397, tetur03g04890	2	no unique probes on array	-
Tetra_522	tetur11g00450	1	tetur11g00450	1
Tetra_523	tetur29g00280	1	tetur29g00280	1
Tetra_1417	tetur02g10620, tetur314g00010	2	no unique probes on array	-
Tetra_525	tetur09g04180, tetur09g92871	2	tetur09g04180	1
Tetra_528	tetur01g02860	1	tetur01g02860	1
Tetra_529	tetur22g01680	1	tetur22g01680	1
Tetra_53	tetur03g08790, tetur03g08910, tetur03g08920, tetur03g08930, tetur03g08950, tetur03g08960, tetur03g08990, tetur03g09010, tetur598g00020	9	tetur03g08790, tetur03g08910, tetur03g08920, tetur03g08930, tetur03g08950, tetur03g08990, tetur03g09010	7
Tetra_1410	tetur02g04020	1	no unique probes on array	-
Tetra_534	tetur04g04660	1	tetur04g04660	1
Tetra_535	tetur11g00400	1	tetur11g00400	1
Tetra_536	tetur12g04410	1	tetur12g04410	1
Tetra_537	tetur22g02600	1	tetur22g02600	1
Tetra_538	tetur34g00850	1	tetur34g00850	1
Tetra_539	tetur07g07430	1	tetur07g07430	1
Tetra_54	tetur03g07610, tetur03g07590, tetur14g02720, tetur31g00630, tetur31g00690, tetur31g00740, tetur31g00770, tetur31g00810, tetur31g00820, tetur31g00830, tetur31g00850, tetur31g00890, tetur31g00910, tetur31g01040, tetur31g01060, tetur31g01860	16	tetur14g02720, tetur31g00630, tetur31g00690, tetur31g00810, tetur31g00830, tetur31g00910, tetur31g01040, tetur31g01060, tetur31g01860	9
Tetra_540	tetur17g01400	1	tetur17g01400	1
Tetra_541	tetur14g01770	1	tetur14g01770	1
Tetra_543	tetur17g00770	1	tetur17g00770	1
Tetra_547	tetur19g00450	1	tetur19g00450	1
Tetra_1407	tetur01g92412, tetur07g06730	2	no unique probes on array	-
Tetra_549	tetur02g15207	1	tetur02g15207	1
Tetra_55	tetur02g07490, tetur02g07470, tetur02g07530, tetur02g07660, tetur02g07690, tetur02g07960, tetur02g07990, tetur02g08080, tetur02g09690, tetur02g09740, tetur02g09780, tetur02g09800, tetur02g90694, tetur02g14651, tetur07g04890, tetur07g08000, tetur07g91858, tetur07g04240	18	tetur02g07470, tetur02g07490, tetur02g07530, tetur02g07690, tetur02g07960, tetur02g07990, tetur02g08080, tetur02g09690, tetur02g09740, tetur02g09780, tetur02g09800, tetur02g14651, tetur07g04240, tetur07g04890, tetur07g08000	15
Tetra_551	tetur08g00580	1	tetur08g00580	1
Tetra_553	tetur05g06700	1	tetur05g06700	1
Tetra_1406	tetur01g92325, tetur01g92324, tetur01g92328	3	no unique probes on array	-
Tetra_556	tetur20g90747, tetur20g02650	2	tetur20g02650	1
Tetra_1403	tetur01g09500	1	no unique probes on array	-
Tetra_559	tetur32g01270	1	tetur32g01270	1
Tetra_56	tetur03g01350, tetur04g02840, tetur14g00470, tetur14g00520, tetur14g00530, tetur18g03000	6	tetur03g01350, tetur04g02840, tetur14g00470, tetur18g03000	4
Tetra_560	tetur15g03400	1	tetur15g03400	1
Tetra_561	tetur01g15840	1	tetur01g15840	1
Tetra_562	tetur37g00520	1	tetur37g00520	1
Tetra_563	tetur24g01200	1	tetur24g01200	1
Tetra_564	tetur11g05700	1	tetur11g05700	1
Tetra_1401	tetur41g91055	1	no unique probes on array	-
Tetra_1383	tetur01g12250	1	no unique probes on array	-
Tetra_567	tetur04g06520	1	tetur04g06520	1
Tetra_568	tetur01g11440	1	tetur01g11440	1
Tetra_569	tetur20g00810	1	tetur20g00810	1
Tetra_570	tetur28g02130	1	tetur28g02130	1
Tetra_571	tetur24g00910	1	tetur24g00910	1
Tetra_572	tetur03g02200	1	tetur03g02200	1
Tetra_573	tetur03g01970	1	tetur03g01970	1
Tetra_574	tetur04g03580	1	tetur04g03580	1
Tetra_1381	tetur01g12530	1	no unique probes on array	-
Tetra_577	tetur24g01410	1	tetur24g01410	1
Tetra_1375	tetur17g01340	1	no unique probes on array	-
Tetra_1374	tetur02g10250	1	no unique probes on array	-
Tetra_1373	tetur15g01550	1	no unique probes on array	-
Tetra_580	tetur18g03580	1	tetur18g03580	1
Tetra_581	tetur01g06380	1	tetur01g06380	1
Tetra_582	tetur17g03750	1	tetur17g03750	1
Tetra_583	tetur17g03730	1	tetur17g03730	1
Tetra_584	tetur17g03660	1	tetur17g03660	1
Tetra_1364	tetur06g04260	1	no unique probes on array	-
Tetra_586	tetur17g03280	1	tetur17g03280	1
Tetra_587	tetur04g04870	1	tetur04g04870	1
Tetra_1355	tetur02g01520	1	no unique probes on array	-
Tetra_589	tetur04g04400	1	tetur04g04400	1
Tetra_59	tetur03g00040, tetur03g00050, tetur03g00070, tetur08g08070, tetur32g01880, tetur33g00840, tetur33g00850, tetur33g00860, tetur33g00870	9	tetur03g00050, tetur03g00070, tetur08g08070, tetur32g01880, tetur33g00840, tetur33g00850, tetur33g00860, tetur33g00870	8
Tetra_590	tetur04g04370	1	tetur04g04370	1
Tetra_591	tetur04g04170	1	tetur04g04170	1
Tetra_592	tetur04g04140	1	tetur04g04140	1
Tetra_593	tetur19g00250	1	tetur19g00250	1
Tetra_594	tetur07g04940	1	tetur07g04940	1
Tetra_595	tetur07g04790	1	tetur07g04790	1
Tetra_596	tetur04g00040	1	tetur04g00040	1
Tetra_597	tetur04g00180	1	tetur04g00180	1
Tetra_598	tetur04g00210	1	tetur04g00210	1
Tetra_599	tetur17g02770	1	tetur17g02770	1
Tetra_6	tetur09g00360, tetur09g00516, tetur09g00536, tetur09g04510, tetur09g04640, tetur09g04650, tetur09g04660, tetur09g04670, tetur09g04680, tetur09g04690, tetur09g04830, tetur09g03700, tetur09g03710, tetur09g07590, tetur09g07600, tetur09g07630, tetur09g07640, tetur09g07650, tetur09g07660, tetur09g07670, tetur09g07680, tetur09g07690, tetur09g07700, tetur09g07710, tetur09g07720, tetur09g07730, tetur09g0…	89	tetur09g03700, tetur09g03710, tetur09g04510, tetur09g04640, tetur09g04650, tetur09g04660, tetur09g04670, tetur09g04680, tetur09g04690, tetur09g04830, tetur09g06739, tetur09g07330, tetur19g02830, tetur25g01690	14
Tetra_60	tetur13g02380, tetur16g01670, tetur266g00010	3	tetur13g02380, tetur16g01670, tetur266g00010	3
Tetra_600	tetur17g02260	1	tetur17g02260	1
Tetra_601	tetur17g02220	1	tetur17g02220	1
Tetra_602	tetur17g01770	1	tetur17g01770	1
Tetra_603	tetur17g01720	1	tetur17g01720	1
Tetra_604	tetur19g00400	1	tetur19g00400	1
Tetra_605	tetur19g00490	1	tetur19g00490	1
Tetra_606	tetur19g00810	1	tetur19g00810	1
Tetra_607	tetur19g01280	1	tetur19g01280	1
Tetra_608	tetur19g01370	1	tetur19g01370	1
Tetra_609	tetur19g01660	1	tetur19g01660	1
Tetra_61	tetur08g03510, tetur11g02330, tetur14g00460, tetur15g00160, tetur15g00180, tetur32g00340, tetur70g00030	7	tetur08g03510, tetur11g02330, tetur14g00460, tetur15g00160, tetur15g00180, tetur32g00340, tetur70g00030	7
Tetra_610	tetur19g01800	1	tetur19g01800	1
Tetra_611	tetur19g01890	1	tetur19g01890	1
Tetra_612	tetur03g09620	1	tetur03g09620	1
Tetra_613	tetur03g09430	1	tetur03g09430	1
Tetra_614	tetur03g09400	1	tetur03g09400	1
Tetra_615	tetur03g09240	1	tetur03g09240	1
Tetra_616	tetur03g09220	1	tetur03g09220	1
Tetra_617	tetur43g00310	1	tetur43g00310	1
Tetra_618	tetur43g00190	1	tetur43g00190	1
Tetra_619	tetur39g00520	1	tetur39g00520	1
Tetra_62	tetur01g16564, tetur04g09459, tetur04g09479, tetur04g09489, tetur04g00770, tetur12g00700, tetur143g00020, tetur32g02287, tetur32g02297, tetur32g00050, tetur44g00291, tetur44g00301, tetur86g00050, tetur86g00060	14	tetur01g16564, tetur04g00770, tetur04g09459, tetur04g09479, tetur04g09489, tetur12g00700, tetur143g00020, tetur86g00060	8
Tetra_620	tetur28g00480	1	tetur28g00480	1
Tetra_621	tetur03g09580	1	tetur03g09580	1
Tetra_622	tetur32g00410	1	tetur32g00410	1
Tetra_623	tetur32g00800	1	tetur32g00800	1
Tetra_624	tetur32g01130	1	tetur32g01130	1
Tetra_625	tetur13g03610	1	tetur13g03610	1
Tetra_1344	tetur09g04170, tetur09g03970	2	no unique probes on array	-
Tetra_627	tetur13g03180	1	tetur13g03180	1
Tetra_628	tetur13g03270	1	tetur13g03270	1
Tetra_629	tetur13g02960	1	tetur13g02960	1
Tetra_630	tetur04g06590	1	tetur04g06590	1
Tetra_1341	tetur03g03490	1	no unique probes on array	-
Tetra_632	tetur12g01220	1	tetur12g01220	1
Tetra_633	tetur12g01200	1	tetur12g01200	1
Tetra_634	tetur12g01190	1	tetur12g01190	1
Tetra_635	tetur03g08710	1	tetur03g08710	1
Tetra_636	tetur03g08560	1	tetur03g08560	1
Tetra_637	tetur02g08400	1	tetur02g08400	1
Tetra_638	tetur03g08300	1	tetur03g08300	1
Tetra_639	tetur01g06170	1	tetur01g06170	1
Tetra_64	tetur04g06240, tetur04g03150, tetur06g02860, tetur16g00870	4	tetur04g03150, tetur04g06240, tetur16g00870	3
Tetra_640	tetur01g06140	1	tetur01g06140	1
Tetra_641	tetur32g01470	1	tetur32g01470	1
Tetra_642	tetur32g01480	1	tetur32g01480	1
Tetra_643	tetur32g01630	1	tetur32g01630	1
Tetra_644	tetur06g06170	1	tetur06g06170	1
Tetra_645	tetur06g06110	1	tetur06g06110	1
Tetra_646	tetur06g05920	1	tetur06g05920	1
Tetra_647	tetur06g05880	1	tetur06g05880	1
Tetra_648	tetur06g05810	1	tetur06g05810	1
Tetra_649	tetur25g00290	1	tetur25g00290	1
Tetra_65	tetur03g00510, tetur03g00570, tetur03g00580, tetur03g00600, tetur03g00620, tetur03g00790, tetur03g00920, tetur03g00950, tetur03g00980, tetur278g00040	10	tetur03g00510, tetur03g00570, tetur03g00580, tetur03g00600, tetur03g00620, tetur03g00790, tetur03g00920, tetur03g00950, tetur03g00980	9
Tetra_650	tetur25g00340	1	tetur25g00340	1
Tetra_651	tetur25g00480	1	tetur25g00480	1
Tetra_1332	tetur23g00350	1	no unique probes on array	-
Tetra_653	tetur25g00510	1	tetur25g00510	1
Tetra_654	tetur25g00520	1	tetur25g00520	1
Tetra_1312	tetur18g03350	1	no unique probes on array	-
Tetra_656	tetur25g00660	1	tetur25g00660	1
Tetra_657	tetur25g00810	1	tetur25g00810	1
Tetra_658	tetur25g01480	1	tetur25g01480	1
Tetra_659	tetur07g05580	1	tetur07g05580	1
Tetra_66	tetur01g10080, tetur01g10090, tetur05g04560, tetur05g04580, tetur16g90599, tetur196g90150, tetur28g01330, tetur28g01360, tetur28g01380, tetur28g01410, tetur55g00040, tetur55g00090	12	tetur05g04560, tetur05g04580, tetur16g90599, tetur196g90150, tetur55g00090	5
Tetra_660	tetur07g05410	1	tetur07g05410	1
Tetra_661	tetur38g00430	1	tetur38g00430	1
Tetra_662	tetur38g00330	1	tetur38g00330	1
Tetra_663	tetur06g02250	1	tetur06g02250	1
Tetra_664	tetur06g02190	1	tetur06g02190	1
Tetra_665	tetur06g02170	1	tetur06g02170	1
Tetra_666	tetur06g02090	1	tetur06g02090	1
Tetra_667	tetur24g00320	1	tetur24g00320	1
Tetra_668	tetur24g00360	1	tetur24g00360	1
Tetra_669	tetur24g00370	1	tetur24g00370	1
Tetra_67	tetur05g00100, tetur06g91414	2	tetur05g00100	1
Tetra_670	tetur24g00550	1	tetur24g00550	1
Tetra_671	tetur24g00570	1	tetur24g00570	1
Tetra_672	tetur24g01170	1	tetur24g01170	1
Tetra_674	tetur02g11830	1	tetur02g11830	1
Tetra_675	tetur02g11950	1	tetur02g11950	1
Tetra_676	tetur21g02780	1	tetur21g02780	1
Tetra_677	tetur21g02620	1	tetur21g02620	1
Tetra_678	tetur21g02610	1	tetur21g02610	1
Tetra_679	tetur21g02600	1	tetur21g02600	1
Tetra_68	tetur02g06140, tetur22g92584	2	tetur02g06140	1
Tetra_680	tetur01g11180	1	tetur01g11180	1
Tetra_1293	tetur12g91752	1	no unique probes on array	-
Tetra_682	tetur26g01170	1	tetur26g01170	1
Tetra_683	tetur26g01090	1	tetur26g01090	1
Tetra_684	tetur26g01080	1	tetur26g01080	1
Tetra_685	tetur08g01940	1	tetur08g01940	1
Tetra_686	tetur27g02568	1	tetur27g02568	1
Tetra_687	tetur27g00170	1	tetur27g00170	1
Tetra_688	tetur07g02070	1	tetur07g02070	1
Tetra_689	tetur13g04520	1	tetur13g04520	1
Tetra_69	tetur30g01670, tetur30g01720, tetur30g01740, tetur30g01750, tetur30g01790, tetur30g01810, tetur30g01850, tetur30g01860, tetur30g01880, tetur30g01890, tetur30g02090	11	tetur30g01720, tetur30g01740, tetur30g01750, tetur30g01790, tetur30g01850, tetur30g01890, tetur30g02090	7
Tetra_690	tetur09g02790	1	tetur09g02790	1
Tetra_691	tetur09g02950	1	tetur09g02950	1
Tetra_692	tetur01g13010	1	tetur01g13010	1
Tetra_693	tetur01g13060	1	tetur01g13060	1
Tetra_694	tetur01g13190	1	tetur01g13190	1
Tetra_695	tetur01g13370	1	tetur01g13370	1
Tetra_696	tetur01g13420	1	tetur01g13420	1
Tetra_698	tetur26g01290	1	tetur26g01290	1
Tetra_699	tetur01g15880	1	tetur01g15880	1
Tetra_7	tetur06g01380, tetur08g01680, tetur142g00010, tetur142g00020, tetur142g00030, tetur142g00050, tetur15g01220, tetur15g01250, tetur15g01270, tetur15g01280, tetur15g01310, tetur15g01340, tetur15g01350, tetur15g01360, tetur15g01370, tetur15g01380, tetur15g01390, tetur15g91246, tetur15g91247, tetur15g91248, tetur15g91249, tetur15g91251, tetur15g91255, tetur15g91256, tetur15g91257, tetur15g00260, tetur…	75	tetur06g01380, tetur08g01680, tetur142g00050, tetur15g00260, tetur15g00820, tetur15g00860, tetur15g01060, tetur15g01070, tetur15g01090, tetur15g01100, tetur15g01110, tetur15g01130, tetur15g01140, tetur15g01160, tetur15g01180, tetur15g01220, tetur15g01250, tetur15g01310, tetur15g01350, tetur15g01370, tetur15g01390, tetur16g02580, tetur16g02590, tetur18g00440, tetur20g02100, tetur20g02110, tetur20g…	38
Tetra_70	tetur01g02640, tetur01g05760, tetur01g92338, tetur02g07910, tetur03g07190, tetur05g08840, tetur08g91190, tetur09g04260, tetur10g02200, tetur11g05250, tetur12g01600, tetur541g00010	12	tetur01g02640, tetur01g05760, tetur02g07910, tetur03g07190, tetur05g08840, tetur10g02200, tetur11g05250, tetur12g01600	8
Tetra_700	tetur01g15900	1	tetur01g15900	1
Tetra_701	tetur01g15920	1	tetur01g15920	1
Tetra_702	tetur12g01510	1	tetur12g01510	1
Tetra_703	tetur04g08130	1	tetur04g08130	1
Tetra_704	tetur04g08090	1	tetur04g08090	1
Tetra_705	tetur04g07830	1	tetur04g07830	1
Tetra_706	tetur10g04740	1	tetur10g04740	1
Tetra_708	tetur09g02440	1	tetur09g02440	1
Tetra_709	tetur14g03320	1	tetur14g03320	1
Tetra_71	tetur05g01960, tetur188g00020, tetur188g00030, tetur23g91463, tetur284g00010, tetur311g00020	6	tetur05g01960, tetur188g00020, tetur188g00030, tetur284g00010, tetur311g00020	5
Tetra_710	tetur14g03200	1	tetur14g03200	1
Tetra_711	tetur20g00110	1	tetur20g00110	1
Tetra_712	tetur20g00200	1	tetur20g00200	1
Tetra_1289	tetur37g00090	1	no unique probes on array	-
Tetra_714	tetur20g00840	1	tetur20g00840	1
Tetra_1286	tetur04g90894	1	no unique probes on array	-
Tetra_716	tetur22g02330	1	tetur22g02330	1
Tetra_717	tetur22g02410	1	tetur22g02410	1
Tetra_718	tetur22g02580	1	tetur22g02580	1
Tetra_719	tetur26g01430	1	tetur26g01430	1
Tetra_72	tetur02g15535, tetur05g07610, tetur09g07580, tetur10g05854, tetur14g04233, tetur16g90560	6	tetur02g15535, tetur05g07610	2
Tetra_720	tetur01g13780	1	tetur01g13780	1
Tetra_722	tetur13g02000	1	tetur13g02000	1
Tetra_723	tetur13g01830	1	tetur13g01830	1
Tetra_724	tetur13g01710	1	tetur13g01710	1
Tetra_726	tetur05g06690	1	tetur05g06690	1
Tetra_727	tetur05g07080	1	tetur05g07080	1
Tetra_728	tetur01g07660	1	tetur01g07660	1
Tetra_1282	tetur08g01340	1	no unique probes on array	-
Tetra_73	tetur07g07140, tetur14g00800, tetur20g01360, tetur20g01390, tetur20g01400, tetur20g01410, tetur20g01420, tetur39g00220	8	tetur07g07140, tetur20g01360, tetur20g01390, tetur20g01400, tetur20g01410, tetur20g01420, tetur39g00220	7
Tetra_730	tetur19g03160	1	tetur19g03160	1
Tetra_731	tetur15g00570	1	tetur15g00570	1
Tetra_732	tetur15g00460	1	tetur15g00460	1
Tetra_733	tetur01g01460	1	tetur01g01460	1
Tetra_1276	tetur10g92045	1	no unique probes on array	-
Tetra_735	tetur26g00710	1	tetur26g00710	1
Tetra_736	tetur26g00780	1	tetur26g00780	1
Tetra_737	tetur01g04260	1	tetur01g04260	1
Tetra_738	tetur26g00340	1	tetur26g00340	1
Tetra_739	tetur12g04270	1	tetur12g04270	1
Tetra_74	tetur02g14310, tetur04g00870, tetur05g04040, tetur06g04530, tetur06g04550, tetur06g04580, tetur06g04600, tetur21g01340, tetur21g01410, tetur21g01420, tetur21g01430, tetur22g02500, tetur47g00140	13	tetur04g00870, tetur06g04530, tetur06g04550, tetur06g04580, tetur06g04600, tetur21g01340, tetur21g01410, tetur21g01420, tetur21g01430, tetur22g02500, tetur47g00140	11
Tetra_740	tetur15g02020	1	tetur15g02020	1
Tetra_741	tetur15g02030	1	tetur15g02030	1
Tetra_742	tetur15g02070	1	tetur15g02070	1
Tetra_743	tetur15g02150	1	tetur15g02150	1
Tetra_744	tetur15g02160	1	tetur15g02160	1
Tetra_745	tetur03g05280	1	tetur03g05280	1
Tetra_746	tetur03g05360	1	tetur03g05360	1
Tetra_747	tetur01g16230	1	tetur01g16230	1
Tetra_748	tetur02g02090	1	tetur02g02090	1
Tetra_749	tetur04g07060	1	tetur04g07060	1
Tetra_75	tetur03g91518, tetur06g06380, tetur09g06726, tetur10g04800, tetur128g00040, tetur14g04193, tetur15g00840, tetur24g01320	8	tetur06g06380, tetur09g06726, tetur15g00840, tetur24g01320	4
Tetra_750	tetur04g07190	1	tetur04g07190	1
Tetra_751	tetur01g09250	1	tetur01g09250	1
Tetra_753	tetur08g02150	1	tetur08g02150	1
Tetra_754	tetur08g02220	1	tetur08g02220	1
Tetra_755	tetur08g02320	1	tetur08g02320	1
Tetra_756	tetur08g02400	1	tetur08g02400	1
Tetra_757	tetur22g00940	1	tetur22g00940	1
Tetra_1270	tetur10g02660	1	no unique probes on array	-
Tetra_759	tetur02g08990	1	tetur02g08990	1
Tetra_76	tetur04g03610, tetur06g91363, tetur06g91364, tetur06g91366, tetur07g07990, tetur09g03040, tetur17g92125, tetur17g01220, tetur34g00350, tetur68g90094	10	tetur04g03610, tetur09g03040, tetur17g01220	3
Tetra_760	tetur05g01470	1	tetur05g01470	1
Tetra_761	tetur05g01460	1	tetur05g01460	1
Tetra_1266	tetur07g01200	1	no unique probes on array	-
Tetra_1256	tetur09g00160	1	no unique probes on array	-
Tetra_764	tetur05g01100	1	tetur05g01100	1
Tetra_765	tetur05g00890	1	tetur05g00890	1
Tetra_766	tetur01g08970	1	tetur01g08970	1
Tetra_767	tetur04g08550	1	tetur04g08550	1
Tetra_768	tetur04g08510	1	tetur04g08510	1
Tetra_769	tetur11g04720	1	tetur11g04720	1
Tetra_770	tetur27g02470	1	tetur27g02470	1
Tetra_771	tetur27g02440	1	tetur27g02440	1
Tetra_772	tetur08g00090	1	tetur08g00090	1
Tetra_773	tetur08g00270	1	tetur08g00270	1
Tetra_774	tetur08g00290	1	tetur08g00290	1
Tetra_1251	tetur17g00700	1	no unique probes on array	-
Tetra_776	tetur01g01710	1	tetur01g01710	1
Tetra_777	tetur01g01700	1	tetur01g01700	1
Tetra_1244	tetur02g04770	1	no unique probes on array	-
Tetra_779	tetur22g02890	1	tetur22g02890	1
Tetra_780	tetur18g02940	1	tetur18g02940	1
Tetra_781	tetur18g02850	1	tetur18g02850	1
Tetra_782	tetur12g00100	1	tetur12g00100	1
Tetra_783	tetur12g00090	1	tetur12g00090	1
Tetra_784	tetur09g03090	1	tetur09g03090	1
Tetra_785	tetur10g92060	1	tetur10g92060	1
Tetra_786	tetur10g05130	1	tetur10g05130	1
Tetra_787	tetur10g05260	1	tetur10g05260	1
Tetra_788	tetur05g08420	1	tetur05g08420	1
Tetra_789	tetur05g08450	1	tetur05g08450	1
Tetra_790	tetur01g01640	1	tetur01g01640	1
Tetra_1242	tetur02g05410	1	no unique probes on array	-
Tetra_1233	tetur09g00870	1	no unique probes on array	-
Tetra_793	tetur01g11660	1	tetur01g11660	1
Tetra_794	tetur01g11550	1	tetur01g11550	1
Tetra_1231	tetur09g01230	1	no unique probes on array	-
Tetra_796	tetur10g03950	1	tetur10g03950	1
Tetra_797	tetur10g03940	1	tetur10g03940	1
Tetra_798	tetur11g00210	1	tetur11g00210	1
Tetra_799	tetur04g02470	1	tetur04g02470	1
Tetra_8	tetur01g00540, tetur02g00760, tetur02g00770, tetur02g06970, tetur02g06980, tetur02g15595, tetur02g11870, tetur02g11890, tetur02g11910, tetur02g12400, tetur02g12440, tetur03g91502, tetur03g07530, tetur03g04430, tetur05g00510, tetur05g00520, tetur05g00540, tetur05g00550, tetur05g00610, tetur05g00640, tetur05g00650, tetur05g00660, tetur05g00670, tetur05g00680, tetur05g00700, tetur05g92610, tetur05g9…	63	tetur01g00540, tetur02g00760, tetur02g00770, tetur02g06970, tetur02g06980, tetur02g11870, tetur02g11890, tetur02g11910, tetur02g12400, tetur02g12440, tetur03g04430, tetur03g07530, tetur05g00510, tetur05g00520, tetur05g00540, tetur05g00550, tetur05g00610, tetur05g00640, tetur05g00650, tetur05g00660, tetur05g00670, tetur05g00680, tetur06g06651, tetur09g03340, tetur09g03380, tetur09g03390, tetur09g0…	48
Tetra_1221	tetur21g01730	1	no unique probes on array	-
Tetra_800	tetur04g09494	1	tetur04g09494	1
Tetra_801	tetur04g02390	1	tetur04g02390	1
Tetra_802	tetur27g01810	1	tetur27g01810	1
Tetra_804	tetur10g04220	1	tetur10g04220	1
Tetra_805	tetur05g09260	1	tetur05g09260	1
Tetra_806	tetur05g05980	1	tetur05g05980	1
Tetra_807	tetur05g06170	1	tetur05g06170	1
Tetra_808	tetur05g06260	1	tetur05g06260	1
Tetra_809	tetur32g00230	1	tetur32g00230	1
Tetra_81	tetur01g92421, tetur07g01150, tetur07g07000, tetur04g03590, tetur12g00990, tetur14g02200, tetur15g01260, tetur23g00780, tetur23g00790, tetur267g00010, tetur354g00020	11	tetur04g03590, tetur07g01150, tetur07g07000, tetur14g02200, tetur15g01260, tetur23g00780, tetur23g00790, tetur267g00010	8
Tetra_810	tetur32g00300	1	tetur32g00300	1
Tetra_811	tetur02g10370	1	tetur02g10370	1
Tetra_1212	tetur06g01880	1	no unique probes on array	-
Tetra_813	tetur05g05370	1	tetur05g05370	1
Tetra_814	tetur05g05450	1	tetur05g05450	1
Tetra_815	tetur26g02590	1	tetur26g02590	1
Tetra_816	tetur02g10760	1	tetur02g10760	1
Tetra_817	tetur02g10910	1	tetur02g10910	1
Tetra_818	tetur02g11050	1	tetur02g11050	1
Tetra_819	tetur02g11230	1	tetur02g11230	1
Tetra_82	tetur07g07710, tetur07g07730	2	tetur07g07710, tetur07g07730	2
Tetra_820	tetur16g01290	1	tetur16g01290	1
Tetra_1190	tetur03g01580	1	no unique probes on array	-
Tetra_822	tetur16g00940	1	tetur16g00940	1
Tetra_823	tetur16g00910	1	tetur16g00910	1
Tetra_824	tetur16g00280	1	tetur16g00280	1
Tetra_826	tetur09g03960	1	tetur09g03960	1
Tetra_827	tetur09g03940	1	tetur09g03940	1
Tetra_828	tetur09g03930	1	tetur09g03930	1
Tetra_829	tetur09g03920	1	tetur09g03920	1
Tetra_1179	tetur10g01490	1	no unique probes on array	-
Tetra_830	tetur38g00700	1	tetur38g00700	1
Tetra_831	tetur09g00300	1	tetur09g00300	1
Tetra_832	tetur09g00380	1	tetur09g00380	1
Tetra_1172	tetur05g07180	1	no unique probes on array	-
Tetra_834	tetur01g00080	1	tetur01g00080	1
Tetra_835	tetur01g00370	1	tetur01g00370	1
Tetra_836	tetur02g08600	1	tetur02g08600	1
Tetra_837	tetur02g08670	1	tetur02g08670	1
Tetra_838	tetur02g05490	1	tetur02g05490	1
Tetra_839	tetur05g04870	1	tetur05g04870	1
Tetra_1170	tetur08g04160	1	no unique probes on array	-
Tetra_840	tetur05g04910	1	tetur05g04910	1
Tetra_841	tetur08g03470	1	tetur08g03470	1
Tetra_842	tetur08g03480	1	tetur08g03480	1
Tetra_843	tetur08g03400	1	tetur08g03400	1
Tetra_844	tetur21g01300	1	tetur21g01300	1
Tetra_1164	tetur01g05210	1	no unique probes on array	-
Tetra_846	tetur21g01030	1	tetur21g01030	1
Tetra_847	tetur21g01070	1	tetur21g01070	1
Tetra_848	tetur21g01090	1	tetur21g01090	1
Tetra_849	tetur09g06580	1	tetur09g06580	1
Tetra_85	tetur01g13270, tetur01g13280, tetur01g13310, tetur01g13320, tetur22g02680, tetur22g02750, tetur22g02991, tetur31g02000, tetur33g01500, tetur63g90083	10	tetur01g13270, tetur01g13280, tetur01g13310, tetur01g13320, tetur22g02750	5
Tetra_850	tetur07g03420	1	tetur07g03420	1
Tetra_1156	tetur10g92036	1	no unique probes on array	-
Tetra_852	tetur13g02870	1	tetur13g02870	1
Tetra_853	tetur04g02150	1	tetur04g02150	1
Tetra_1154	tetur16g90557	1	no unique probes on array	-
Tetra_855	tetur14g01310	1	tetur14g01310	1
Tetra_856	tetur05g04970	1	tetur05g04970	1
Tetra_857	tetur05g09220	1	tetur05g09220	1
Tetra_858	tetur05g09180	1	tetur05g09180	1
Tetra_859	tetur05g09070	1	tetur05g09070	1
Tetra_1145	tetur23g01680	1	no unique probes on array	-
Tetra_860	tetur05g09060	1	tetur05g09060	1
Tetra_861	tetur05g08970	1	tetur05g08970	1
Tetra_862	tetur13g02080	1	tetur13g02080	1
[truncated: 6,126 more rows]
